# Supplementary material for: Stochastic Gain and Loss of Novel Transcribed Open Reading Frames in the Human Lineage
Source: Oxford University Press journal article supplement (doi:10.1093/gbe/evaa194), 2020-09-14
Supplement: evaa194_supplementary_data.zip [file evaa194_supplementary_data.zip]

Archive with 2 entries (2 files):
- dowling-codeml-results.csv
- dowling-supplementary-material-1.pdf
