# Supplementary material for: Stochastic Gain and Loss of Novel Transcribed Open Reading Frames in the Human Lineage
Source: Oxford University Press journal article supplement (doi:10.1093/gbe/evaa194), 2020-09-14
Supplement: evaa194_supplementary_data.zip [file evaa194_supplementary_data.zip › dowling-codeml-results.csv]

	orf_id	m0	dnds.m0	m1a	dnds.m1a	m2a	dnds.m2a	LRT	p.value	p.value.adjust	omega	age
1	gene10304_2	-522.608165	999	-524.194441	1	-522.608262	951.4395	-3.172552	1	1	999	90
2	gene10449_2	-974.836269	0.6071	-974.83627	0.6071	-974.83627	0.6071	-2.00E-06	1	1	0.6071	90
3	gene10583_3	-1743.203792	1.00E-04	-1743.203257	0	-1743.20318	0	0.00107	0.999465143	1	1.00E-04	90
4	gene10583_3	-1743.203792	1.00E-04	-1743.203257	0	-1743.20318	0	0.00107	0.999465143	1	1.00E-04	90
5	gene11836_1	-2213.244927	0.5949	-2205.017375	0.3787	-2182.375247	71.7068	16.455104	0.00026719	0.002720114	0.3787	90
6	gene11912_2	-598.847452	1.2765	-597.171902	0.4787	-585.809653	7.8911	3.3511	0.187205188	0.650834143	1.2765	90
7	gene12015_4	-1716.498376	0.465	-1713.668582	0.4774	-1712.531402	20.5321	5.659588	0.059025012	0.255091751	0.465	90
8	gene13087_3	-768.736467	999	-769.586819	1	-768.736789	949.025	-1.700704	1	1	999	90
9	gene13207_4	-552.05056	0.0062	-551.003987	0.4655	-552.05056	0.0062	2.093146	0.351139043	1	0.0062	90
10	gene13248_3	-503.653456	121.7883	-504.08423	1	-503.650561	259.1585	-0.861548	1	1	121.7883	90
11	gene13465_2	-472.751425	2.1	-472.751415	0.3274	-472.75142	0.7283	2.00E-05	0.99999	1	2.1	90
12	gene13715_4	-1762.197321	0.3132	-1762.197323	0.3132	-1762.197321	0.3132	-4.00E-06	1	1	0.3132	90
13	gene14140_1	-486.042149	0.5377	-486.03029	0.5384	-486.03029	0.5384	0.023718	0.988211041	1	0.5377	90
14	gene14146_3	-1355.839973	0.5597	-1352.071783	0.7452	-1351.862806	1.2219	7.53638	0.023093825	0.118178489	0.5597	90
15	gene1422_5	-1241.481105	0.8948	-1241.340956	0.9095	-1241.481105	0.8948	0.280298	0.869228711	1	0.8948	90
16	gene14692_4	-2596.102065	0.6632	-2595.965647	0.6624	-2594.766839	0.8829	0.272836	0.872477861	1	0.6632	90
17	gene14734_2	-810.849077	999	-812.845345	1	-809.263412	101.6676	-3.992536	1	1	999	90
18	gene14769_1	-285.412176	0.5353	-278.011725	0.2906	-263.437309	245.5809	14.800902	0.000610977	0.005568201	0.2906	90
19	gene14769_1	-285.412176	0.5353	-278.011725	0.2906	-263.437309	245.5809	14.800902	0.000610977	0.005568201	0.2906	90
20	gene14913_1	-556.784155	0.3163	-556.783045	0.3194	-556.764826	0.4717	0.00222	0.998890616	1	0.3163	90
21	gene15500_8	-369.979396	113.6833	-369.979374	0.6315	-369.979348	0	4.40E-05	0.999978	1	113.6833	90
22	gene15561_1	-178.060224	999	-178.466869	1	-178.060379	950.0935	-0.81329	1	1	999	6.65
23	gene15647_7	-5896.312777	1.0414	-5896.172011	0.8965	-5893.592699	1.2636	0.281532	0.868692562	1	1.0414	90
24	gene15747_3	-230.209378	2.1001	-230.209388	0.6303	-230.20937	998.9875	-2.00E-05	1	1	2.1001	90
25	gene15909_1	-547.525047	1.3684	-547.322848	0.5242	-544.978378	2.5124	0.404398	0.816932342	1	1.3684	90
26	gene1617_1	-786.960092	0.3562	-786.887964	0.4027	-786.88795	0.4035	0.144256	0.930411795	1	0.3562	90
27	gene16616_3	-924.943746	0.9254	-924.943749	0.9238	-924.943746	0.9254	-6.00E-06	1	1	0.9254	90
28	gene1667_3	-1943.995481	1.5414	-1944.302889	1	-1943.109337	1.9282	-0.614816	1	1	1.5414	90
29	gene16695_2	-1465.250033	0.8468	-1459.703417	0.4602	-1440.958709	73.2436	11.093232	0.003900635	0.027126209	0.4602	90
30	gene16786_1	-402.561639	0.3151	-402.561639	0.3151	-402.561639	0.3151	0	1	1	0.3151	90
31	gene16819_1	-1475.365091	0.0049	-1475.372319	0.4305	-1474.244889	24.9677	-0.014456	1	1	0.0049	90
32	gene16824_1	-895.318358	1.9944	-895.966831	1	-895.318358	1.9944	-1.296946	1	1	1.9944	90
33	gene16875_4	-303.200553	1.6742	-303.306227	1	-303.200553	1.6742	-0.211348	1	1	1.6742	29.44
34	gene17044_2	-869.187764	1.0162	-869.188205	1	-868.735376	1.0771	-0.000882	1	1	1.0162	90
35	gene17884_8	-1759.901842	0.0053	-1759.724273	0.3582	-1759.724273	0.3582	0.355138	0.837303223	1	0.0053	90
36	gene18093_4	-607.977063	999	-608.93014	1	-607.97712	951.435	-1.906154	1	1	999	90
37	gene18144_3	-378.163425	1.1121	-378.166154	1	-378.162385	1.1122	-0.005458	1	1	1.1121	90
38	gene18294_2	-679.611157	0.8781	-679.611719	0.8783	-679.611157	0.8781	-0.001124	1	1	0.8781	90
39	gene18554_4	-2573.086995	0.9512	-2571.37805	0.6714	-2556.425905	14.2784	3.41789	0.181056707	0.634148118	0.9512	90
40	gene18615_5	-380.994801	1.9006	-381.176066	1	-380.994801	1.9006	-0.36253	1	1	1.9006	90
41	gene18662_4	-1237.409367	0.2866	-1237.409367	0.2866	-1237.409367	0.2866	0	1	1	0.2866	90
42	gene18800_5	-300.804336	999	-301.831996	1	-300.804399	951.3283	-2.05532	1	1	999	90
43	gene19305_3	-1120.204218	0.1755	-1120.204227	0.1755	-1120.037711	0.0065	-1.80E-05	1	1	0.1755	90
44	gene19412_13	-2099.841167	0.9619	-2097.4344	0.6504	-2087.41793	72.367	4.813534	0.090106137	0.36006712	0.9619	90
45	gene19446_15	-451.200882	999	-452.972657	1	-451.201499	951.4324	-3.54355	1	1	999	90
46	gene19484_10	-692.525379	999	-694.239102	1	-692.525484	951.435	-3.427446	1	1	999	29.44
47	gene19489_1	-1478.503061	0.4325	-1478.503061	0.4325	-1478.503712	0.434	0	1	1	0.4325	90
48	gene19544_5	-546.744326	0.9486	-546.162292	0.9113	-545.918111	1.5418	1.164068	0.558760691	1	0.9486	29.44
49	gene19722_1	-1773.162149	1.0536	-1773.17404	1	-1773.162149	1.0536	-0.023782	1	1	1.0536	90
50	gene19857_4	-969.895941	0.2002	-964.63646	0.7865	-964.636465	0.8015	10.518962	0.005198002	0.034395911	0.7865	90
51	gene20163_4	-8108.837218	0.2523	-8108.351244	0.2597	-8107.371105	0.3811	0.971948	0.6150978	1	0.2523	90
52	gene2033_3	-1287.550418	0.6196	-1284.655077	0.4013	-1272.852192	4.1555	5.790682	0.055280171	0.241522516	0.6196	90
53	gene20518_1	-444.385173	1.0799	-444.387437	1	-444.385468	1.0798	-0.004528	1	1	1.0799	90
54	gene20666_3	-1780.572949	1.8825	-1780.931201	1	-1780.572949	1.8825	-0.716504	1	1	1.8825	90
55	gene20796_5	-3834.427915	0.4147	-3834.427916	0.4147	-3834.427915	0.4147	-2.00E-06	1	1	0.4147	90
56	gene20837_1	-1161.539079	5.444	-1163.260827	1	-1161.539079	5.444	-3.443496	1	1	5.444	29.44
57	gene21110_11	-1487.089473	0.5645	-1487.089473	0.5645	-1487.089473	0.5645	0	1	1	0.5645	90
58	gene21189_3	-3687.041078	0.0047	-3686.247585	0.2687	-3686.247585	0.2687	1.586986	0.452262281	1	0.0047	90
59	gene21190_2	-5425.449193	1.1414	-5425.529531	1	-5425.449193	1.1414	-0.160676	1	1	1.1414	90
60	gene21243_4	-1139.736809	2.8686	-1140.344224	1	-1138.331582	3.6699	-1.21483	1	1	2.8686	90
61	gene21243_4	-1139.736809	2.8686	-1140.344224	1	-1138.331582	3.6699	-1.21483	1	1	2.8686	90
62	gene21243_4	-1139.736809	2.8686	-1140.344224	1	-1138.331582	3.6699	-1.21483	1	1	2.8686	90
63	gene21243_4	-1139.736809	2.8686	-1140.344224	1	-1138.331582	3.6699	-1.21483	1	1	2.8686	90
64	gene21243_4	-1139.736809	2.8686	-1140.344224	1	-1138.331582	3.6699	-1.21483	1	1	2.8686	90
65	gene21245_4	-1139.736809	2.8686	-1140.344224	1	-1138.331582	3.6699	-1.21483	1	1	2.8686	90
66	gene21245_4	-1139.736809	2.8686	-1140.344224	1	-1138.331582	3.6699	-1.21483	1	1	2.8686	90
67	gene21245_4	-1139.736809	2.8686	-1140.344224	1	-1138.331582	3.6699	-1.21483	1	1	2.8686	90
68	gene21245_4	-1139.736809	2.8686	-1140.344224	1	-1138.331582	3.6699	-1.21483	1	1	2.8686	90
69	gene21245_4	-1139.736809	2.8686	-1140.344224	1	-1138.331582	3.6699	-1.21483	1	1	2.8686	90
70	gene21290_5	-2915.793198	0.5882	-2905.46314	0.3432	-2870.956591	18.7585	20.660116	3.26E-05	0.000432336	0.3432	90
71	gene2135_10	-1060.664509	0.3821	-1060.664509	0.3821	-1060.664509	0.3821	0	1	1	0.3821	90
72	gene2194_2	-1275.2442	0.9882	-1275.244205	0.9886	-1275.244202	0.9884	-1.00E-05	1	1	0.9882	90
73	gene22031_3	-620.970532	1.5736	-619.424063	0.4834	-602.576957	79.8806	3.092938	0.212998746	0.720612262	1.5736	90
74	gene22130_3	-1869.342818	0.685	-1869.342819	0.685	-1869.342818	0.685	-2.00E-06	1	1	0.685	90
75	gene22530_1	-834.09991	0.4464	-833.410875	0.6735	-833.153757	8.0581	1.37807	0.502060324	1	0.4464	90
76	gene22850_3	-2186.843955	1.5851	-2187.813915	1	-2185.568783	1.6907	-1.93992	1	1	1.5851	90
77	gene22910_3	-1532.704388	0.3658	-1524.540482	0.3908	-1518.899125	17.1536	16.327812	0.000284748	0.002882222	0.3908	29.44
78	gene23630_2	-977.662151	0.7315	-968.41433	0.4602	-955.302168	15.7063	18.495642	9.63E-05	0.001111056	0.4602	90
79	gene23747_4	-2138.69024	0.6593	-2138.611498	0.6592	-2138.23536	1.6499	0.157484	0.924278358	1	0.6593	90
80	gene23967_4	-2661.847745	0.3147	-2659.959547	0.6202	-2658.915251	18.9315	3.776396	0.151344286	0.548328201	0.3147	90
81	gene24336_4	-452.196695	1.00E-04	-452.196694	0	-452.196944	0.6139	2.00E-06	0.999999	1	1.00E-04	90
82	gene24381_2	-1517.345053	0.9555	-1517.153028	0.7617	-1515.876453	1.1128	0.38405	0.825286236	1	0.9555	90
83	gene25017_1	-804.402345	0.142	-804.402364	0.142	-804.402345	0.142	-3.80E-05	1	1	0.142	90
84	gene25020_2	-488.698222	999	-489.925537	1	-488.698222	999	-2.45463	1	1	999	90
85	gene25057_1	-1334.711715	2.0913	-1335.276996	0.8933	-1328.958777	3.0786	-1.130562	1	1	2.0913	90
86	gene2515_4	-877.891976	1.312	-877.919875	1	-877.891976	1.312	-0.055798	1	1	1.312	90
87	gene25160_5	-3034.223923	0.9134	-3013.035477	0.3839	-2931.650259	95.1289	42.376892	6.28E-10	2.64E-08	0.3839	90
88	gene2531_3	-850.969945	0.4832	-850.969945	0.4832	-850.969945	0.4832	0	1	1	0.4832	90
89	gene2535_2	-829.533073	1.5575	-829.611793	1	-829.533486	1.5574	-0.15744	1	1	1.5575	90
90	gene25379_1	-238.287882	0.5561	-238.287882	0.5561	-238.287882	0.5561	0	1	1	0.5561	90
91	gene25481_4	-418.042567	999	-418.92718	1	-418.042879	951.3958	-1.769226	1	1	999	90
92	gene25523_4	-661.467076	0.0062	-660.090388	0.5287	-659.937348	11.7655	2.753376	0.252413163	0.825189376	0.0062	90
93	gene25523_4	-661.467076	0.0062	-660.090388	0.5287	-659.937348	11.7655	2.753376	0.252413163	0.825189376	0.0062	90
94	gene25551_4	-1274.720669	0.6887	-1270.170334	0.5735	-1258.960895	127.8968	9.10067	0.010563665	0.062179836	0.5735	29.44
95	gene2556_3	-1229.21775	0.3445	-1222.94899	0.7158	-1222.850946	1.5446	12.53752	0.001894576	0.014807319	0.7158	29.44
96	gene25595_3	-846.840016	1.7258	-839.094875	0.5303	-839.00677	12.9173	15.490282	0.000432841	0.004135837	0.5303	90
97	gene25642_4	-1852.266985	0.8828	-1850.507254	0.6663	-1844.332048	1.7242	3.519462	0.17209115	0.608285427	0.8828	90
98	gene25652_3	-1210.936567	0.8259	-1210.936567	0.8259	-1210.936567	0.8259	0	1	1	0.8259	90
99	gene25662_10	-1539.012292	1.4744	-1539.488103	1	-1539.012292	1.4744	-0.951622	1	1	1.4744	29.44
100	gene25677_6	-852.233783	0.5029	-847.737181	0.8036	-846.956363	18.7442	8.993204	0.011146809	0.064943747	0.8036	15.76
101	gene25683_1	-609.128406	0.7588	-607.871495	0.3802	-601.627158	35.776	2.513822	0.284531588	0.909392016	0.7588	90
102	gene25695_4	-756.400791	1.6215	-743.802764	0.3915	-743.802763	0.3915	25.196054	3.38E-06	5.81E-05	0.3915	90
103	gene25727_2	-1066.081193	0.2896	-1066.081199	0.2896	-1066.081193	0.2896	-1.20E-05	1	1	0.2896	90
104	gene25727_2	-1066.081193	0.2896	-1066.081199	0.2896	-1066.081193	0.2896	-1.20E-05	1	1	0.2896	90
105	gene25731_4	-756.400791	1.7283	-746.418739	0.5287	-746.2657	13.2611	19.964104	4.62E-05	0.000582735	0.5287	90
106	gene25994_2	-4591.48258	0.0061	-4587.894036	0.3899	-4587.894036	0.3899	7.177088	0.027638543	0.13680238	0.0061	90
107	gene26056_2	-1236.392254	3.4601	-1237.301327	1	-1236.392254	3.4601	-1.818146	1	1	3.4601	90
108	gene26059_1	-470.239875	0.3159	-470.239875	0.3159	-470.239875	0.3159	0	1	1	0.3159	90
109	gene26255_4	-1693.558183	0.8601	-1693.558183	0.8601	-1693.558346	0.8619	0	1	1	0.8601	90
110	gene27385_1	-282.167277	0.4979	-281.083323	0.2317	-278.752873	5.2745	2.167908	0.338255416	1	0.4979	90
111	gene27552_3	-270.186256	0.9371	-270.186256	0.9371	-270.186256	0.9371	0	1	1	0.9371	90
112	gene2764_2	-458.081099	0.7863	-458.0811	0.7863	-458.081099	0.7863	-2.00E-06	1	1	0.7863	90
113	gene27778_6	-2571.095032	0.5327	-2566.38093	0.4526	-2551.927839	39.1379	9.428204	0.008967916	0.054328825	0.4526	90
114	gene27814_3	-1263.235744	0.1729	-1262.509013	0.6186	-1262.509013	0.6186	1.453462	0.483486928	1	0.1729	90
115	gene2788_4	-1019.399006	1.0419	-1019.402274	1	-1019.399006	1.0419	-0.006536	1	1	1.0419	90
116	gene27936_5	-2515.201738	0.5939	-2491.737233	0.3687	-2431.636338	50.8327	46.92901	6.45E-11	3.32E-09	0.3687	90
117	gene27959_6	-2511.646153	0.566	-2486.743762	0.3532	-2425.657048	35.6393	49.804782	1.53E-11	8.97E-10	0.3532	90
118	gene28016_7	-1098.81463	0.3659	-1098.814634	0.3659	-1098.81463	0.3659	-8.00E-06	1	1	0.3659	90
119	gene2817_3	-2821.270347	0.7759	-2810.443917	0.3933	-2776.169124	8.8733	21.65286	1.99E-05	0.000278895	0.3933	90
120	gene28234_1	-1542.426372	0.5114	-1541.970044	0.5843	-1541.557839	8.6213	0.912656	0.63360598	1	0.5114	90
121	gene28292_1	-193.962044	1.00E-04	-193.961934	0	-193.961917	0	0.00022	0.999890006	1	1.00E-04	90
122	gene28306_3	-1241.440633	0.2458	-1241.440634	0.2458	-1241.440633	0.2458	-2.00E-06	1	1	0.2458	90
123	gene28403_4	-3904.858899	1.0615	-3904.876412	1	-3891.767599	4.8138	-0.035026	1	1	1.0615	90
124	gene29297_5	-531.053929	1.2135	-531.080657	1	-531.053929	1.2135	-0.053456	1	1	1.2135	29.44
125	gene2948_1	-201.539992	0.7727	-201.465098	0.7422	-200.338905	2.975	0.149788	0.927841832	1	0.7727	90
126	gene29673_6	-441.900871	0.1975	-441.900871	0.1975	-441.900871	0.1975	0	1	1	0.1975	90
127	gene30520_1	-532.734055	0.7514	-529.566198	0.536	-520.201971	27.7923	6.335714	0.042093708	0.192747272	0.7514	90
128	gene30623_1	-560.863184	1.00E-04	-560.863086	0	-560.863036	0	0.000196	0.999902005	1	1.00E-04	90
129	gene30623_1	-560.863184	1.00E-04	-560.863086	0	-560.863036	0	0.000196	0.999902005	1	1.00E-04	90
130	gene30980_1	-708.036237	0.6959	-704.628594	0.3282	-691.467434	27.1561	6.815286	0.03311917	0.15855462	0.6959	90
131	gene31121_2	-2562.919214	0.509	-2562.816304	0.522	-2561.518659	5.7477	0.20582	0.902208169	1	0.509	90
132	gene31673_5	-1026.950603	0.9013	-1026.950603	0.9013	-1026.950603	0.9013	0	1	1	0.9013	90
133	gene31766_1	-206.952312	907.9546	-207.3801	1	-206.952413	951.4347	-0.855576	1	1	907.9546	90
134	gene32132_1	-322.912011	0.5515	-321.564327	0.5445	-318.694726	3.6815	2.695368	0.259841357	0.843736593	0.5515	90
135	gene32767_7	-450.766175	999	-450.999086	1	-450.766188	951.4319	-0.465822	1	1	999	90
136	gene33710_2	-1294.978984	1.5781	-1295.237577	1	-1294.978984	1.5781	-0.517186	1	1	1.5781	90
137	gene34089_2	-821.621622	0.5106	-821.621623	0.5106	-821.621622	0.5106	-2.00E-06	1	1	0.5106	90
138	gene3409_5	-1107.620838	0.0345	-1104.852314	0.7077	-1104.852314	0.7077	5.537048	0.062754562	0.268088199	0.0345	90
139	gene34336_1	-238.786488	0.6681	-238.786489	0.6681	-238.786488	0.6681	-2.00E-06	1	1	0.6681	90
140	gene34498_2	-688.929893	0.5686	-688.930236	0.5685	-688.930236	0.5686	-0.000686	1	1	0.5686	90
141	gene34759_1	-720.999353	2.5665	-721.872163	1	-720.999354	2.5665	-1.74562	1	1	2.5665	90
142	gene35063_1	-633.075834	2.0997	-633.075606	0	-633.075483	0	0.000456	0.999772026	1	2.0997	90
143	gene35265_8	-4092.169319	0.4979	-4084.716268	0.2638	-4053.518413	9.648	14.906102	0.00057967	0.005319395	0.2638	90
144	gene35424_2	-648.833109	0.1289	-648.83311	0.1289	-648.833109	0.1289	-2.00E-06	1	1	0.1289	90
145	gene36021_1	-545.62868	1.4858	-545.694633	1	-545.62868	1.4858	-0.131906	1	1	1.4858	90
146	gene36332_3	-679.169074	0.2963	-672.921842	0.478	-672.746768	0.6732	12.494464	0.001935805	0.015067457	0.478	90
147	gene36752_3	-718.312573	0.007	-718.024276	0.4066	-718.024276	0.4066	0.576594	0.749538946	1	0.007	90
148	gene37058_3	-797.222017	1.875	-797.566886	1	-797.222017	1.875	-0.689738	1	1	1.875	90
149	gene37195_3	-1406.490101	0.6483	-1406.490102	0.6483	-1406.490101	0.6483	-2.00E-06	1	1	0.6483	90
150	gene37442_2	-1025.100473	0.9295	-1025.100473	0.9295	-1025.100473	0.9295	0	1	1	0.9295	90
151	gene37700_1	-343.257055	999	-343.97129	1	-343.257097	951.4307	-1.42847	1	1	999	90
152	gene37898_1	-441.570294	0.2874	-440.128769	0.3128	-438.890681	2.5922	2.88305	0.236566719	0.783020874	0.2874	29.44
153	gene37986_4	-1412.665568	0.269	-1412.665582	0.269	-1412.665568	0.269	-2.80E-05	1	1	0.269	90
154	gene38351_8	-2001.844147	0.4826	-1989.327781	0.3593	-1970.02831	144.5447	25.032732	3.67E-06	6.23E-05	0.3593	90
155	gene38674_5	-3419.815327	0.4798	-3419.416158	0.5003	-3417.741577	1.059	0.798338	0.670877314	1	0.4798	90
156	gene38678_7	-1255.444805	0.5389	-1249.687138	0.613	-1240.924603	50.0764	11.515334	0.003158472	0.022734763	0.613	29.44
157	gene38681_5	-3420.549592	0.5042	-3420.216117	0.5234	-3418.490739	1.1255	0.66695	0.716429809	1	0.5042	90
158	gene38884_6	-5958.473608	0.213	-5958.473608	0.213	-5958.476024	0.214	0	1	1	0.213	90
159	gene38886_7	-7461.296081	0.226	-7461.296083	0.226	-7461.296081	0.226	-4.00E-06	1	1	0.226	90
160	gene39053_3	-1063.211604	1.06	-1063.20667	1	-1063.205683	1.0617	0.009868	0.995078152	1	1.06	90
161	gene39836_2	-1159.633508	0.5587	-1149.916614	0.4178	-1131.674957	40.248	19.433788	6.03E-05	0.000731765	0.4178	90
162	gene40064_10	-1252.112172	0.4681	-1250.025227	0.3073	-1242.27232	16.7949	4.17389	0.124065578	0.467095088	0.4681	90
163	gene40067_5	-1555.549282	0.4619	-1553.11546	0.7501	-1552.983427	23.3909	4.867644	0.087700998	0.352507313	0.4619	90
164	gene40231_3	-801.620404	1.61	-799.571581	0.0142	-799.571578	0.0141	4.097646	0.128886514	0.481390219	1.61	90
165	gene40428_2	-1085.630651	0.0258	-1084.891441	0.797	-1085.377919	0.2943	1.47842	0.477490984	1	0.0258	90
166	gene40525_11	-2824.126066	1.1125	-2824.16254	1	-2818.286829	3.3528	-0.072948	1	1	1.1125	90
167	gene40570_8	-5818.894325	0.91	-5816.386176	0.5707	-5778.205058	16.6509	5.016298	0.081418806	0.331935795	0.91	90
168	gene40590_9	-2792.917209	0.9888	-2792.778805	0.8091	-2788.739905	1.0955	0.276808	0.870746839	1	0.9888	90
169	gene40593_10	-6394.516813	0.8312	-6391.659573	0.5569	-6353.224632	14.2719	5.71448	0.05742704	0.249057617	0.8312	90
170	gene40794_3	-2945.078071	0.3977	-2944.082164	0.2986	-2942.398875	2.2678	1.991814	0.369388257	1	0.3977	29.44
171	gene40844_2	-2830.909906	2.1262	-2832.837077	1	-2826.469079	2.891	-3.854342	1	1	2.1262	29.44
172	gene4094_4	-746.254699	0.214	-744.619006	0.1645	-737.375513	24.552	3.271386	0.194817316	0.671450036	0.214	90
173	gene4148_1	-712.213785	0.6447	-712.213785	0.6447	-712.213785	0.6447	0	1	1	0.6447	90
174	gene41849_2	-510.800527	0.2737	-510.80054	0.2737	-510.800527	0.2737	-2.60E-05	1	1	0.2737	90
175	gene41871_1	-3355.942894	0.7043	-3350.58728	0.4096	-3334.693209	115.1044	10.711228	0.00472157	0.031820581	0.4096	90
176	gene42031_6	-627.446338	0.6556	-627.213293	0.5135	-624.245021	20.9134	0.46609	0.792117927	1	0.6556	90
177	gene42652_4	-1239.847217	0.2026	-1239.847218	0.2026	-1239.847771	0.2026	-2.00E-06	1	1	0.2026	90
178	gene42700_4	-1668.236575	0.4894	-1668.236579	0.4894	-1668.236575	0.4894	-8.00E-06	1	1	0.4894	90
179	gene42737_3	-677.649261	0.3002	-677.649264	0.3002	-677.649261	0.3002	-6.00E-06	1	1	0.3002	90
180	gene42895_2	-1005.853954	2.1054	-1006.123785	1	-1005.853954	2.1054	-0.539662	1	1	2.1054	90
181	gene42951_2	-230.906156	0.7988	-230.648563	0.6544	-230.248924	1.0073	0.515186	0.772909742	1	0.7988	29.44
182	gene42967_4	-3205.919978	0.0088	-3203.469457	0.5218	-3203.469457	0.5218	4.901042	0.086248639	0.347607156	0.0088	90
183	gene43347_8	-918.184795	0.7958	-918.185463	0.7958	-918.185592	0.7963	-0.001336	1	1	0.7958	90
184	gene43540_3	-766.444336	114.0965	-766.818719	1	-766.444411	114.6073	-0.748766	1	1	114.0965	90
185	gene43550_5	-7207.639377	0.6785	-7206.311664	0.6018	-7192.19835	8.4178	2.655426	0.265082813	0.858516061	0.6785	90
186	gene43560_2	-540.886958	999	-541.330547	1	-540.887121	950.1222	-0.887178	1	1	999	90
187	gene43561_4	-1441.074362	0.4885	-1436.237321	0.7971	-1436.237321	0.7971	9.674082	0.007930486	0.048969476	0.7971	90
188	gene43799_2	-1443.849861	999	-1446.071806	1	-1443.849996	951.4395	-4.44389	1	1	999	90
189	gene43919_7	-289.149006	0.1496	-289.149007	0.1496	-289.149006	0.1496	-2.00E-06	1	1	0.1496	90
190	gene44024_8	-3257.834158	0.6348	-3236.904541	0.5972	-3216.314078	111.5877	41.859234	8.14E-10	3.32E-08	0.5972	90
191	gene44046_4	-4564.675407	0.3856	-4561.658304	0.4937	-4558.145632	19.2052	6.034206	0.0489428	0.217709278	0.3856	90
192	gene44052_1	-418.900162	1.0044	-415.769181	0.6689	-407.663778	476.0662	6.261962	0.043674931	0.198271066	1.0044	90
193	gene44690_2	-456.121875	0.3275	-456.071327	0.4997	-456.071327	0.4997	0.101096	0.950708294	1	0.3275	90
194	gene44957_2	-1177.486749	0.2006	-1177.113118	0.205	-1176.718958	0.2692	0.747262	0.688230822	1	0.2006	90
195	gene4510_17	-761.58874	0.6949	-761.58874	0.6949	-761.58874	0.6949	0	1	1	0.6949	29.44
196	gene45876_2	-774.557364	0.539	-772.224563	0.3168	-764.939121	75.5305	4.665602	0.097023603	0.381866851	0.539	90
197	gene45966_3	-1542.028984	0.8178	-1541.504628	0.43	-1538.809667	2.8964	1.048712	0.591936449	1	0.8178	90
198	gene46003_7	-554.464986	1.00E-04	-554.464495	0	-554.464442	0	0.000982	0.999509121	1	1.00E-04	90
199	gene46017_2	-923.128247	0.1635	-920.147132	0.5903	-920.120221	1.3666	5.96223	0.050736231	0.224733035	0.1635	90
200	gene46091_3	-1230.285423	0.5244	-1230.285423	0.5244	-1230.285423	0.5244	0	1	1	0.5244	90
201	gene46343_2	-684.196869	0.4466	-684.196871	0.4466	-684.196869	0.4466	-4.00E-06	1	1	0.4466	90
202	gene468_2	-631.926673	999	-632.751149	1	-629.369282	45.854	-1.648952	1	1	999	90
203	gene46891_2	-2534.095588	0.9946	-2534.02133	0.8426	-2533.232273	1.0982	0.148516	0.928432127	1	0.9946	90
204	gene4708_2	-839.346636	0.9548	-839.347174	0.9647	-839.346636	0.9548	-0.001076	1	1	0.9548	90
205	gene475_5	-498.89106	0.618	-498.89106	0.618	-498.89106	0.618	0	1	1	0.618	29.44
206	gene47500_1	-419.759226	1.514	-419.827111	1	-419.759226	1.514	-0.13577	1	1	1.514	90
207	gene47522_3	-343.985114	1.5144	-344.056527	1	-343.985114	1.5144	-0.142826	1	1	1.5144	90
208	gene47553_2	-1204.486042	1.8661	-1189.741478	0.5545	-1189.738979	4.6755	29.489128	3.95E-07	8.63E-06	0.5545	90
209	gene4759_1	-716.22483	1.0209	-716.22537	1	-716.22537	1	-0.00108	1	1	1.0209	90
210	gene47874_9	-1342.321529	0.844	-1333.807914	0.5881	-1319.121705	23.9556	17.02723	0.000200717	0.002117789	0.5881	29.44
211	gene4827_1	-749.057299	0.8856	-748.95562	0.8954	-748.616271	48.6279	0.203358	0.903319471	1	0.8856	90
212	gene48517_3	-927.961628	0.4029	-927.961628	0.4029	-927.961628	0.4029	0	1	1	0.4029	90
213	gene48823_3	-1319.142882	0.6492	-1317.84964	0.7676	-1317.824657	0.8639	2.586484	0.2743798	0.884024471	0.6492	90
214	gene49312_4	-3527.817715	0.9273	-3526.683096	0.641	-3507.746873	14.4186	2.269238	0.321544606	1	0.9273	90
215	gene49660_6	-764.506022	0.6099	-764.506022	0.6099	-764.506022	0.6099	0	1	1	0.6099	29.44
216	gene49737_2	-1492.64103	999	-1497.977841	1	-1489.878032	126.3297	-10.673622	1	1	999	90
217	gene49748_1	-1194.422495	0.7295	-1189.279449	0.492	-1177.476582	100.4687	10.286092	0.005839874	0.03787325	0.492	90
218	gene50426_1	-279.688717	500.7198	-280.405788	1	-279.687845	999	-1.434142	1	1	500.7198	90
219	gene50466_9	-1207.383949	0.8036	-1200.613597	0.602	-1186.74642	46.2832	13.540704	0.001147291	0.009604644	0.602	90
220	gene50779_2	-602.322347	0.4479	-602.32235	0.4479	-602.322347	0.4479	-6.00E-06	1	1	0.4479	90
221	gene50933_1	-1258.189266	0.7574	-1255.133408	0.6278	-1252.867933	2.3651	6.111716	0.047082307	0.211067218	0.7574	90
222	gene5103_3	-1816.335148	1.1149	-1816.364054	1	-1816.335148	1.1149	-0.057812	1	1	1.1149	90
223	gene51955_2	-966.487496	2.0749	-966.730018	1	-966.487496	2.0749	-0.485044	1	1	2.0749	90
224	gene52239_8	-1085.820614	475.6691	-1086.846272	1	-1085.820386	520.9727	-2.051316	1	1	475.6691	90
225	gene52244_4	-1731.597044	2.0381	-1731.834219	1	-1731.599056	2.0276	-0.47435	1	1	2.0381	90
226	gene52245_1	-456.306999	1.97	-448.693061	0.7988	-447.119477	34.1457	15.227876	0.000493525	0.004634049	0.7988	90
227	gene52260_4	-885.236931	0.9326	-880.303069	0.6171	-860.427829	233.313	9.867724	0.007198648	0.045082121	0.6171	90
228	gene52269_4	-1849.591935	0.738	-1849.591935	0.738	-1849.591935	0.738	0	1	1	0.738	90
229	gene525_1	-813.648748	0.8893	-806.710089	0.5994	-791.974844	26.9025	13.877318	0.000969569	0.008267324	0.5994	29.44
230	gene52818_16	-906.483682	1.00E-04	-906.483552	0	-906.483532	0	0.00026	0.999870008	1	1.00E-04	90
231	gene53037_4	-354.624334	1.00E-04	-354.61645	0	-354.616494	0	0.015768	0.992146997	1	1.00E-04	90
232	gene53038_4	-670.790685	0.116	-670.729349	0.2621	-670.729349	0.2621	0.122672	0.940507176	1	0.116	90
233	gene53048_9	-979.709559	999	-980.357251	0.5772	-974.063498	32.9744	-1.295384	1	1	999	90
234	gene53337_9	-1555.519229	2.2404	-1555.819317	1	-1555.519229	2.2403	-0.600176	1	1	2.2404	90
235	gene53337_9	-1555.519229	2.2404	-1555.819317	1	-1555.519229	2.2403	-0.600176	1	1	2.2404	90
236	gene53581_4	-732.002803	1.9967	-732.432012	1	-732.002803	1.9967	-0.858418	1	1	1.9967	90
237	gene53984_2	-1426.388883	0.6671	-1426.388884	0.6671	-1426.388883	0.6671	-2.00E-06	1	1	0.6671	29.44
238	gene54006_18	-785.862941	0.9322	-785.862941	0.9322	-785.862941	0.9322	0	1	1	0.9322	29.44
239	gene55029_11	-13903.33007	0.7701	-13903.33007	0.7701	-13903.33007	0.7701	-2.00E-06	1	1	0.7701	90
240	gene55060_6	-627.446338	0.6556	-627.213293	0.5135	-624.245021	20.9134	0.46609	0.792117927	1	0.6556	90
241	gene55513_24	-759.108564	0.7872	-759.108564	0.7872	-759.108564	0.7872	0	1	1	0.7872	29.44
242	gene55513_24	-759.108564	0.7872	-759.108564	0.7872	-759.108564	0.7872	0	1	1	0.7872	29.44
243	gene55636_1	-1475.365092	0.0049	-1475.372319	0.4305	-1474.244888	32.0924	-0.014454	1	1	0.0049	90
244	gene56754_10	-2828.230791	1.1713	-2828.31261	1	-2822.477253	3.354	-0.163638	1	1	1.1713	90
245	gene56761_4	-2735.595773	0.9156	-2735.596102	0.9176	-2735.595773	0.9156	-0.000658	1	1	0.9156	90
246	gene56795_8	-5854.556419	0.8519	-5851.806902	0.5631	-5814.609456	14.5501	5.499034	0.063958746	0.27186001	0.8519	90
247	gene57018_12	-1466.251137	1.6043	-1464.23151	0.5077	-1429.02999	29.157	4.039254	0.132704955	0.492867507	1.6043	90
248	gene57037_12	-1470.092842	1.406	-1467.412237	0.4899	-1433.144267	29.0448	5.36121	0.068521686	0.287801756	1.406	90
249	gene57037_12	-1470.092842	1.406	-1467.412237	0.4899	-1433.144267	29.0448	5.36121	0.068521686	0.287801756	1.406	90
250	gene57038_20	-488.445062	0.0703	-488.260335	0.3348	-488.260335	0.3348	0.369454	0.831331206	1	0.0703	90
251	gene57606_8	-1679.102526	0.4978	-1679.102527	0.4979	-1679.102526	0.4978	-2.00E-06	1	1	0.4978	90
252	gene58020_4	-2025.66825	1.199	-2017.191561	0.5685	-1971.569124	36.3883	16.953378	0.000208267	0.002186547	0.5685	90
253	gene58730_8	-1690.679055	0.3806	-1690.679058	0.3806	-1690.679056	0.3806	-6.00E-06	1	1	0.3806	90
254	gene59446_8	-1678.261761	0.6327	-1678.261762	0.6327	-1678.261761	0.6327	-2.00E-06	1	1	0.6327	90
255	gene59828_8	-1678.261761	0.6327	-1678.261762	0.6327	-1678.261761	0.6327	-2.00E-06	1	1	0.6327	90
256	gene6018_2	-1296.553782	0.7542	-1295.920578	0.529	-1290.690324	9.9513	1.266408	0.530888108	1	0.7542	90
257	gene6045_3	-447.730436	999	-449.739785	1	-447.730436	999	-4.018698	1	1	999	90
258	gene60501_1	-884.041201	25.4897	-899.273487	1	-884.041201	25.4897	-30.464572	1	1	25.4897	90
259	gene60504_1	-305.884286	0.0642	-305.884308	0.0642	-305.884286	0.0642	-4.40E-05	1	1	0.0642	90
260	gene60508_1	-661.640327	2.7545	-663.572679	1	-661.640327	2.7545	-3.864704	1	1	2.7545	29.44
261	gene6405_3	-1303.857003	0.6689	-1303.857003	0.6689	-1303.857003	0.6689	0	1	1	0.6689	90
262	gene6420_3	-246.6909	1.9352	-247.465038	1	-246.6909	1.9352	-1.548276	1	1	1.9352	90
263	gene646_1	-202.889146	999	-203.28323	1	-202.889289	951.4299	-0.788168	1	1	999	90
264	gene6501_8	-2783.543433	0.0078	-2778.509972	0.5351	-2778.509972	0.5351	10.066922	0.006516219	0.041467164	0.5351	90
265	gene6533_1	-495.323971	999	-495.754871	1	-495.324123	951.4604	-0.8618	1	1	999	90
266	gene6581_5	-1151.930159	0.1513	-1147.778584	0.7212	-1147.695041	53.6098	8.30315	0.015739607	0.086463388	0.7212	90
267	gene6630_2	-1489.802398	0.682	-1489.802398	0.682	-1489.802398	0.682	0	1	1	0.682	29.44
268	gene6638_5	-5224.076889	0.562	-5223.519918	0.5373	-5223.025831	0.6545	1.113942	0.572941879	1	0.562	90
269	gene6658_3	-839.876147	0.1678	-838.074085	0.4857	-837.90947	11.4688	3.604124	0.164958393	0.586974184	0.1678	90
270	gene6689_8	-1461.356642	0.6091	-1453.385933	0.7287	-1448.636377	60.9633	15.941418	0.000345434	0.003410012	0.7287	29.44
271	gene7034_1	-512.787238	0.7939	-512.787238	0.7939	-512.787238	0.7939	0	1	1	0.7939	90
272	gene7073_1	-1110.521117	0.6093	-1110.521117	0.6093	-1110.521117	0.6093	0	1	1	0.6093	90
273	gene7355_2	-4840.475181	0.5622	-4817.672483	0.4119	-4780.405355	13.6596	45.605396	1.25E-10	6.02E-09	0.4119	90
274	gene7663_4	-559.079952	2.0999	-559.079639	0	-559.079639	0	0.000626	0.999687049	1	2.0999	90
275	gene767_2	-586.620016	0.4711	-583.341155	0.7472	-582.537827	2.2028	6.557722	0.03767114	0.175303348	0.4711	90
276	gene7779_3	-1163.359316	0.7491	-1162.984426	0.6635	-1158.070957	35.2807	0.74978	0.687364885	1	0.7491	90
277	gene779_2	-733.636658	0.9701	-733.636935	0.97	-733.636936	0.9702	-0.000554	1	1	0.9701	90
278	gene8202_2	-1378.369784	0.9378	-1378.369784	0.9378	-1378.369784	0.9378	0	1	1	0.9378	90
279	gene8268_4	-767.02203	0.2882	-767.02203	0.2882	-767.02203	0.2882	0	1	1	0.2882	90
280	gene8373_15	-622.558835	1.5429	-622.847592	1	-621.413775	3.1388	-0.577514	1	1	1.5429	90
281	gene9056_2	-553.577896	2.6104	-554.047938	1	-553.577896	2.6104	-0.940084	1	1	2.6104	90
282	gene9150_7	-334.701061	999	-335.097705	1	-334.701202	951.7036	-0.793288	1	1	999	90
283	gene9269_3	-898.806345	999	-899.343545	1	-898.806392	949.5585	-1.0744	1	1	999	90
284	gene9872_2	-707.329292	0.7444	-707.329292	0.7444	-707.329292	0.7444	0	1	1	0.7444	90
285	gene9895_3	-609.689738	1.596	-609.448602	0.5252	-600.628876	9.2806	0.482272	0.785734759	1	1.596	90
286	id1704305_1	-834.559531	0.2639	-834.545183	0.2648	-834.545429	0.2648	0.028696	0.985754442	1	0.2639	90
287	MSTRG.10.10_2	-432.17488	1.2726	-432.196359	1	-432.17488	1.2726	-0.042958	1	1	1.2726	29.44
288	MSTRG.10.10_2	-432.17488	1.2726	-432.196359	1	-432.17488	1.2726	-0.042958	1	1	1.2726	29.44
289	MSTRG.10000.1_4	-585.748546	0.8434	-578.76257	0.2115	-555.792298	58.5874	13.971952	0.00092476	0.007952563	0.2115	90
290	MSTRG.10003.1_1	-268.970889	0.5983	-268.970892	0.5983	-268.970889	0.5983	-6.00E-06	1	1	0.5983	29.44
291	MSTRG.10004.1_31	-446.177311	999	-446.62285	1	-446.177464	951.4201	-0.891078	1	1	999	9.06
292	MSTRG.10005.1_2	-288.553329	1.00E-04	-288.553196	0	-288.553176	0	0.000266	0.999867009	1	1.00E-04	9.06
293	MSTRG.10007.16_10	-8767.473925	0.0044	-8761.867816	0.4028	-8761.867816	0.4028	11.212218	0.003675342	0.025822606	0.4028	90
294	MSTRG.10007.2_18	-14631.96284	0.1117	-14631.96285	0.1117	-14631.96284	0.1117	-6.00E-06	1	1	0.1117	90
295	MSTRG.10008.2_1	-435.752923	2.1	-435.752914	0	-435.752913	0.0011	1.80E-05	0.999991	1	2.1	29.44
296	MSTRG.10009.1_3	-195.061431	1.0165	-195.061518	1	-195.061431	1.0165	-0.000174	1	1	1.0165	6.65
297	MSTRG.10010.1_1	-497.214608	0.3731	-497.04468	0.4051	-497.038951	0.4227	0.339856	0.843725563	1	0.3731	29.44
298	MSTRG.10011.1_2	-618.623263	0.8285	-615.592781	0.6438	-610.380761	9.1252	6.060964	0.048292356	0.215231477	0.8285	90
299	MSTRG.10012.50_3	-1310.607764	1.158	-1302.284258	0.294	-1268.453908	111.9925	16.647012	0.000242743	0.002498898	0.294	90
300	MSTRG.10022.1_3	-1855.752468	0.0049	-1854.708628	0.4083	-1854.708627	0.4083	2.08768	0.352100019	1	0.0049	90
301	MSTRG.10022.7_1	-368.658569	195.2413	-368.947265	1	-368.657493	517.9917	-0.577392	1	1	195.2413	29.44
302	MSTRG.10023.1_4	-801.941544	1.0273	-800.308744	0.428	-783.450488	47.5344	3.2656	0.195381739	0.673066387	1.0273	90
303	MSTRG.10023.1_4	-801.941544	1.0273	-800.308744	0.428	-783.450488	47.5344	3.2656	0.195381739	0.673066387	1.0273	90
304	MSTRG.10027.1_4	-264.404421	0.2425	-264.404654	0.2425	-264.404421	0.2425	-0.000466	1	1	0.2425	15.76
305	MSTRG.10029.8_5	-1918.480123	0.1196	-1916.536644	0.492	-1916.536644	0.4919	3.886958	0.143204872	0.524316212	0.1196	90
306	MSTRG.10031.6_3	-1359.280052	0.6273	-1354.120489	0.2828	-1332.503601	62.4771	10.319126	0.005744209	0.037367389	0.2828	90
307	MSTRG.10039.8_17	-864.610435	0.7742	-859.652013	0.592	-852.665629	14.7224	9.916844	0.007024003	0.044145212	0.592	90
308	MSTRG.10046.12_5	-4144.098445	1.00E-04	-4144.095949	0	-4144.095674	0	0.004992	0.997507112	1	1.00E-04	90
309	MSTRG.10052.1_1	-180.878694	1.00E-04	-180.878694	0	-180.878694	0	0	1	1	1.00E-04	6.65
310	MSTRG.10057.27_4	-2430.740203	0.7897	-2420.988051	0.2547	-2372.711209	38.5522	19.504304	5.82E-05	0.000709264	0.2547	90
311	MSTRG.10060.1_2	-1008.430324	0.9342	-1004.716313	0.664	-995.242053	31.495	7.428022	0.024379541	0.123532738	0.9342	29.44
312	MSTRG.10062.1_4	-653.629286	2.0999	-653.629235	0	-653.629277	0.858	0.000102	0.999949001	1	2.0999	90
313	MSTRG.10076.18_1	-580.372969	0.4392	-576.109705	0.2704	-554.463287	110.4919	8.526528	0.014076282	0.078862223	0.2704	90
314	MSTRG.10078.1_2	-1638.622764	0.8167	-1638.622764	0.8168	-1638.622764	0.8167	0	1	1	0.8167	90
315	MSTRG.10082.5_3	-815.984495	1.00E-04	-815.983993	0	-815.983938	0	0.001004	0.999498126	1	1.00E-04	90
316	MSTRG.10084.1_17	-478.021335	1.00E-04	-478.021171	0	-478.021148	0	0.000328	0.999836013	1	1.00E-04	90
317	MSTRG.10086.1_8	-398.764874	1.0154	-398.764978	1	-398.764874	1.0154	-0.000208	1	1	1.0154	29.44
318	MSTRG.10087.1_2	-386.422143	1.9646	-385.224726	0.0143	-384.824279	0.9119	2.394834	0.301973202	0.95575151	1.9646	29.44
319	MSTRG.10090.9_3	-1507.649338	1.00E-04	-1507.649386	0	-1507.649057	0	-9.60E-05	1	1	1.00E-04	90
320	MSTRG.10093.1_1	-609.963475	0.4444	-609.949071	0.5503	-609.949071	0.5503	0.028808	0.985699241	1	0.4444	29.44
321	MSTRG.10096.1_20	-660.79993	0.1627	-660.799931	0.1627	-660.79993	0.1627	-2.00E-06	1	1	0.1627	90
322	MSTRG.101.14_2	-1644.570626	0.6964	-1622.806604	0.4549	-1566.027806	276.5349	43.528044	3.53E-10	1.54E-08	0.4549	90
323	MSTRG.10103.1_4	-491.124021	1.282	-491.072022	0.8263	-490.140414	1.5699	0.103998	0.949329816	1	1.282	29.44
324	MSTRG.10110.1_2	-1416.84632	0.208	-1416.846321	0.208	-1416.846831	0.208	-2.00E-06	1	1	0.208	90
325	MSTRG.10114.5_3	-2107.366373	1.00E-04	-2107.366209	0	-2107.35952	0	0.000328	0.999836013	1	1.00E-04	90
326	MSTRG.10119.2_2	-182.183429	999	-182.593988	1	-182.183582	951.4037	-0.821118	1	1	999	9.06
327	MSTRG.10120.1_2	-3996.099673	1.00E-04	-3996.099318	0	-3996.099257	0	0.00071	0.999645063	1	1.00E-04	90
328	MSTRG.10128.1_4	-380.560337	0.5915	-376.390813	0.6235	-370.771515	308.8617	8.339048	0.015459617	0.085096344	0.6235	90
329	MSTRG.10129.9_2	-1269.265432	0.536	-1248.654186	0.2414	-1214.995395	66.4233	41.222492	1.12E-09	4.41E-08	0.2414	90
330	MSTRG.10134.1_1	-284.529356	1.0556	-284.231742	0.8157	-281.351415	188.0572	0.595228	0.742587923	1	1.0556	29.44
331	MSTRG.10139.1_4	-296.082567	0.4626	-295.326254	0.3508	-294.959267	0.5549	1.512626	0.469393896	1	0.4626	6.65
332	MSTRG.10140.1_6	-830.103846	0.8156	-825.376176	0.7723	-822.76962	2.8064	9.45534	0.008847061	0.053673521	0.7723	29.44
333	MSTRG.10142.1_3	-723.5138	1.5002	-715.156794	0.6918	-715.15664	1.9491	16.714012	0.000234746	0.002429576	0.6918	29.44
334	MSTRG.10144.1_2	-366.924545	0.4009	-366.406931	0.4323	-366.361844	0.5062	1.035228	0.595940768	1	0.4009	29.44
335	MSTRG.10145.1_2	-382.600576	0.7868	-381.940912	0.723	-380.388253	2.0573	1.319328	0.517025026	1	0.7868	29.44
336	MSTRG.10153.1_1	-934.102331	1.1941	-934.124842	1	-934.102331	1.1941	-0.045022	1	1	1.1941	90
337	MSTRG.10158.1_1	-144.516845	999	-145.276666	1	-144.516845	998.9999	-1.519642	1	1	999	6.65
338	MSTRG.10171.1_9	-484.367191	0.7642	-477.412546	0.5748	-469.309313	18.0065	13.90929	0.000954193	0.008159234	0.5748	29.44
339	MSTRG.10177.2_1	-382.311927	2.1	-382.311932	0.7028	-382.311915	205.134	-1.00E-05	1	1	2.1	90
340	MSTRG.10179.4_5	-1078.217685	0.1561	-1078.180866	0.2265	-1078.174046	6.6628	0.073638	0.963850577	1	0.1561	90
341	MSTRG.10182.7_2	-2035.908543	0.2946	-2031.577688	0.1867	-2020.360556	4.7334	8.66171	0.013156294	0.07443739	0.1867	90
342	MSTRG.10183.1_1	-347.180287	0.8309	-344.972876	0.6045	-341.723863	10.224	4.414822	0.109985031	0.423196315	0.8309	29.44
343	MSTRG.10184.1_1	-156.213512	2.1	-156.213495	0.3292	-156.213501	0.5355	3.40E-05	0.999983	1	2.1	6.65
344	MSTRG.10185.1_5	-547.753691	999	-550.297506	0.675	-540.188831	60.8448	-5.08763	1	1	999	29.44
345	MSTRG.10196.3_1	-800.719542	0.6298	-800.719542	0.6298	-800.719542	0.6298	0	1	1	0.6298	15.76
346	MSTRG.10198.1_6	-472.507436	0.5348	-472.507613	0.5348	-472.507605	0.5348	-0.000354	1	1	0.5348	6.65
347	MSTRG.10199.1_4	-392.615319	999	-393.035513	1	-392.615319	999	-0.840388	1	1	999	29.44
348	MSTRG.10202.7_5	-536.247569	0.0046	-536.247575	0.0046	-536.24756	0.0046	-1.20E-05	1	1	0.0046	90
349	MSTRG.10204.1_3	-622.765081	0.349	-622.579291	0.5569	-622.445721	3.4048	0.37158	0.830447971	1	0.349	15.76
350	MSTRG.10207.1_16	-729.366431	0.969	-725.99315	0.8416	-724.703926	2.3042	6.746562	0.03427699	0.163023768	0.969	90
351	MSTRG.10211.1_1	-269.72677	0.521	-269.72677	0.521	-269.727131	0.521	0	1	1	0.521	6.65
352	MSTRG.10221.5_1	-625.359397	0.1748	-622.769449	0.665	-622.768396	0.6694	5.179896	0.075023941	0.309684191	0.1748	90
353	MSTRG.10228.1_5	-235.893955	999	-236.289278	1	-235.894098	951.9025	-0.790646	1	1	999	15.76
354	MSTRG.10229.1_1	-357.956077	0.6931	-355.299883	0.5496	-342.836489	277.7527	5.312388	0.070214952	0.293730929	0.6931	6.65
355	MSTRG.10230.1_1	-355.745058	0.7273	-355.745058	0.7273	-355.745058	0.7273	0	1	1	0.7273	29.44
356	MSTRG.10233.1_2	-344.462246	1.0071	-338.246252	0.4072	-323.899299	316.3011	12.431988	0.00199723	0.01551649	0.4072	6.65
357	MSTRG.10240.1_1	-371.512485	0.7087	-370.501467	0.613	-369.925463	0.995	2.022036	0.363848393	1	0.7087	6.65
358	MSTRG.10241.1_13	-1360.994164	0.5186	-1355.392513	0.6981	-1353.25668	71.3686	11.203302	0.003691764	0.025920763	0.6981	90
359	MSTRG.10246.1_1	-223.133123	0.6211	-223.133123	0.6211	-223.133123	0.6211	0	1	1	0.6211	90
360	MSTRG.10249.1_1	-5458.535213	0.7963	-5458.535213	0.7963	-5458.535213	0.7963	0	1	1	0.7963	90
361	MSTRG.10253.1_1	-246.129746	0.3315	-246.129753	0.3315	-246.129746	0.3315	-1.40E-05	1	1	0.3315	29.44
362	MSTRG.10255.1_3	-386.422512	2.0999	-386.422482	0.1418	-386.422441	0	6.00E-05	0.99997	1	2.0999	90
363	MSTRG.10255.1_3	-386.422512	2.0999	-386.422482	0.1418	-386.422441	0	6.00E-05	0.99997	1	2.0999	90
364	MSTRG.10257.1_2	-5438.686558	2.1001	-5438.686554	1	-5438.686557	0.7471	8.00E-06	0.999996	1	2.1001	90
365	MSTRG.10257.1_2	-5438.686558	2.1001	-5438.686554	1	-5438.686557	0.7471	8.00E-06	0.999996	1	2.1001	90
366	MSTRG.10258.2_1	-1326.57719	0.3692	-1326.57719	0.3692	-1326.57719	0.3692	0	1	1	0.3692	90
367	MSTRG.10261.1_4	-332.981446	1.5714	-332.981372	0.1939	-332.981298	0	0.000148	0.999926003	1	1.5714	15.76
368	MSTRG.10281.1_1	-178.94016	999	-179.135305	1	-178.940171	951.4316	-0.39029	1	1	999	6.65
369	MSTRG.10283.1_17	-3298.373825	0.9531	-3294.030532	0.6686	-3265.510577	59.807	8.686586	0.01299367	0.073694659	0.6686	29.44
370	MSTRG.10292.1_3	-350.261671	0.2622	-350.261671	0.2622	-350.261671	0.2622	0	1	1	0.2622	90
371	MSTRG.10293.1_2	-205.544095	2.1098	-205.544078	0.2932	-205.544088	0.8038	3.40E-05	0.999983	1	2.1098	6.65
372	MSTRG.10294.1_1	-474.174751	0.5901	-471.893505	0.4793	-461.947635	82.7636	4.562492	0.10215684	0.398718743	0.5901	29.44
373	MSTRG.103.2_3	-880.711438	1.001	-880.632249	0.8193	-880.057124	1.108	0.158378	0.923865297	1	1.001	15.76
374	MSTRG.10309.1_6	-297.128236	1.00E-04	-297.127811	0	-297.127765	0	0.00085	0.99957509	1	1.00E-04	29.44
375	MSTRG.10310.1_5	-254.874681	2.1	-254.874676	0.246	-254.87468	0.9576	1.00E-05	0.999995	1	2.1	90
376	MSTRG.10310.1_5	-254.874681	2.1	-254.874676	0.246	-254.87468	0.9576	1.00E-05	0.999995	1	2.1	90
377	MSTRG.10312.7_2	-773.249581	0.2806	-769.519033	0.6232	-769.519033	0.6232	7.461096	0.023979691	0.121915494	0.2806	90
378	MSTRG.10320.1_3	-213.765873	2.1	-213.765753	0	-213.765832	0.3518	0.00024	0.999880007	1	2.1	9.06
379	MSTRG.10321.3_3	-626.824266	0.5259	-626.824266	0.5259	-626.8246	0.5258	0	1	1	0.5259	90
380	MSTRG.10322.1_2	-376.834865	0.5055	-376.834865	0.5055	-376.834865	0.5055	0	1	1	0.5055	6.65
381	MSTRG.10325.1_5	-669.28967	0.5128	-668.875048	0.5361	-666.898835	22.1313	0.829244	0.660589937	1	0.5128	90
382	MSTRG.10327.1_10	-380.22544	999	-380.665589	1	-380.225585	952.0936	-0.880298	1	1	999	15.76
383	MSTRG.10328.1_13	-415.199069	2.1	-415.19907	1	-415.19904	83.7987	-2.00E-06	1	1	2.1	29.44
384	MSTRG.10333.12_9	-2050.031478	0.0047	-2049.178709	0.3445	-2049.178709	0.3445	1.705538	0.426233057	1	0.0047	90
385	MSTRG.10334.1_7	-356.510364	0.4886	-356.510531	0.4886	-356.510531	0.4886	-0.000334	1	1	0.4886	29.44
386	MSTRG.10341.1_2	-560.054134	0.6794	-554.796464	0.4565	-552.445112	1.2945	10.51534	0.005207424	0.034447484	0.4565	29.44
387	MSTRG.10342.1_1	-482.572365	1.9842	-483.46204	0.8948	-480.63537	8.0975	-1.77935	1	1	1.9842	29.44
388	MSTRG.10343.1_1	-584.100885	0.6306	-579.452698	0.6512	-571.978119	36.6845	9.296374	0.009578953	0.057340902	0.6512	29.44
389	MSTRG.10353.1_1	-513.846399	0.8084	-513.146307	0.7659	-512.97641	0.9817	1.400184	0.49653962	1	0.8084	90
390	MSTRG.10355.1_7	-349.885623	2.1884	-350.081545	0.7399	-347.073849	36.0394	-0.391844	1	1	2.1884	29.44
391	MSTRG.10359.1_1	-448.662006	0.7747	-445.661624	0.504	-438.494217	93.2433	6.000764	0.049768053	0.220875763	0.7747	29.44
392	MSTRG.10367.2_5	-419.169534	2.4204	-420.49075	1	-419.10903	2.5841	-2.642432	1	1	2.4204	29.44
393	MSTRG.10371.9_1	-959.897402	0.8384	-949.18282	0.4928	-925.13248	323.7127	21.429164	2.22E-05	0.000308501	0.4928	90
394	MSTRG.10381.26_10	-20672.97052	0.1143	-20672.97052	0.1143	-20672.97052	0.1143	-2.00E-06	1	1	0.1143	90
395	MSTRG.10385.1_3	-288.494787	0.66	-286.25446	0.5128	-284.312501	1.6833	4.480654	0.106423698	0.412247353	0.66	29.44
396	MSTRG.10388.1_2	-301.044053	1.5883	-301.127372	1	-301.044053	1.5883	-0.166638	1	1	1.5883	6.65
397	MSTRG.10393.1_1	-343.706323	1.3571	-343.903997	1	-343.706323	1.3571	-0.395348	1	1	1.3571	29.44
398	MSTRG.10398.6_7	-2450.732826	1.00E-04	-2450.732472	0	-2450.725634	0	0.000708	0.999646063	1	1.00E-04	90
399	MSTRG.104.1_1	-216.125386	337.6011	-216.312358	1	-216.125328	373.246	-0.373944	1	1	337.6011	15.76
400	MSTRG.10406.1_3	-380.442706	0.5641	-376.23093	0.4671	-370.612129	170.0188	8.423552	0.014820025	0.082137181	0.4671	90
401	MSTRG.10413.4_5	-1368.247389	0.4185	-1363.144258	0.0782	-1347.964647	7.4851	10.206262	0.006077688	0.03906821	0.0782	90
402	MSTRG.10427.1_1	-248.249688	999	-248.705467	1	-248.249842	951.4307	-0.911558	1	1	999	9.06
403	MSTRG.10436.1_1	-279.539934	2.1	-279.539865	0.1342	-279.539748	0	0.000138	0.999931002	1	2.1	90
404	MSTRG.10446.1_1	-792.226851	0.0092	-791.15207	0.5756	-791.15207	0.5756	2.149562	0.341372508	1	0.0092	29.44
405	MSTRG.10466.9_2	-3402.43065	0.8413	-3373.564723	0.2582	-3267.358101	107.6735	57.731854	2.91E-13	2.31E-11	0.2582	90
406	MSTRG.10474.3_2	-2663.944481	0.0627	-2663.316229	0.3243	-2663.314507	2.1148	1.256504	0.533523586	1	0.0627	90
407	MSTRG.10476.16_6	-4417.206928	0.7064	-4417.206928	0.7064	-4417.206928	0.7064	0	1	1	0.7064	90
408	MSTRG.105.24_2	-3312.208467	0.806	-3275.262116	0.327	-3182.577991	20.8787	73.892702	9.00E-17	1.28E-14	0.327	90
409	MSTRG.10511.27_6	-3651.162949	0.7883	-3604.002781	0.3172	-3470.430243	144.0668	94.320336	3.30E-21	1.03E-18	0.3172	90
410	MSTRG.10511.7_6	-3892.932971	0.736	-3836.292497	0.3603	-3721.797908	49.5773	113.280948	2.52E-25	1.52E-22	0.3603	90
411	MSTRG.10516.2_1	-640.044006	1.00E-04	-640.043611	0	-640.043568	0	0.00079	0.999605078	1	1.00E-04	15.76
412	MSTRG.10525.1_4	-482.174669	0.7962	-481.666918	0.6153	-481.165429	0.8943	1.015502	0.601847613	1	0.7962	29.44
413	MSTRG.10530.1_7	-620.334833	0.5245	-620.334834	0.5245	-620.334833	0.5245	-2.00E-06	1	1	0.5245	90
414	MSTRG.10531.11_6	-3361.167192	1.00E-04	-3361.166544	0	-3361.166446	0	0.001296	0.99935221	1	1.00E-04	90
415	MSTRG.10531.7_3	-3818.537407	0.449	-3815.349726	0.311	-3801.913135	8.4351	6.375362	0.041267459	0.189523244	0.449	90
416	MSTRG.10545.2_2	-1614.458058	3.2538	-1613.575205	0.3728	-1592.183821	26.6254	1.765706	0.413601223	1	3.2538	90
417	MSTRG.10546.1_4	-904.855843	1.2709	-902.834191	0.7402	-896.771988	2.2536	4.043304	0.132436499	0.49230177	1.2709	29.44
418	MSTRG.10549.1_2	-299.583548	0.9832	-298.131053	0.5855	-296.155548	1.6785	2.90499	0.233985765	0.776709376	0.9832	29.44
419	MSTRG.10552.1_3	-343.340226	0.4066	-343.340226	0.4066	-343.340226	0.4066	0	1	1	0.4066	29.44
420	MSTRG.10557.1_2	-376.552256	0.7012	-370.791819	0.4133	-364.198234	81.4192	11.520874	0.003149735	0.022717462	0.4133	6.65
421	MSTRG.10568.1_4	-1875.041966	0.006	-1866.342923	0.6688	-1866.342927	0.6688	17.398086	0.000166745	0.001808046	0.6688	15.76
422	MSTRG.10573.1_1	-202.900888	1.00E-04	-202.900281	0	-202.900219	0	0.001214	0.999393184	1	1.00E-04	15.76
423	MSTRG.10574.1_1	-204.970945	0.5677	-204.970945	0.5677	-204.970945	0.5677	0	1	1	0.5677	29.44
424	MSTRG.10577.1_4	-277.13292	999	-277.58503	1	-277.133106	910.5329	-0.90422	1	1	999	29.44
425	MSTRG.10578.4_1	-1170.546948	0.6479	-1155.152887	0.4117	-1134.726031	91.2555	30.788122	2.06E-07	4.82E-06	0.4117	90
426	MSTRG.10579.1_9	-586.383527	1.2582	-583.598321	0.6916	-578.194251	6.0613	5.570412	0.061716374	0.264614896	1.2582	29.44
427	MSTRG.10583.1_2	-436.931252	0.8262	-436.931252	0.8262	-436.931252	0.8262	0	1	1	0.8262	29.44
428	MSTRG.10599.1_4	-1300.500785	0.242	-1299.824006	0.3049	-1299.824006	0.3049	1.353558	0.508251437	1	0.242	90
429	MSTRG.10603.18_4	-5582.602479	0.0764	-5582.60248	0.0764	-5582.602479	0.0764	-2.00E-06	1	1	0.0764	90
430	MSTRG.10622.1_1	-213.765837	2.1	-213.765787	0	-213.765826	0.5535	0.0001	0.999950001	1	2.1	29.44
431	MSTRG.10626.1_3	-1157.171333	0.0084	-1156.904649	0.2904	-1156.904649	0.2904	0.533368	0.765915062	1	0.0084	90
432	MSTRG.10626.6_7	-3279.609625	0.1713	-3279.609903	0.1713	-3279.609903	0.1713	-0.000556	1	1	0.1713	90
433	MSTRG.10629.1_3	-2830.285993	0.9947	-2826.972723	0.3376	-2809.084239	26.8907	6.62654	0.036396961	0.170695575	0.9947	90
434	MSTRG.10636.1_1	-706.335948	1.3965	-703.202216	0.7149	-695.060112	25.7773	6.267464	0.043554947	0.197913656	1.3965	29.44
435	MSTRG.10637.1_2	-452.677152	0.6364	-447.860413	0.5508	-444.382957	31.8083	9.633478	0.008093136	0.049755969	0.5508	29.44
436	MSTRG.10640.1_1	-262.69142	999	-263.335682	1	-262.691459	951.4334	-1.288524	1	1	999	29.44
437	MSTRG.10663.1_3	-176.767914	2.0999	-176.767796	0	-176.767793	0	0.000236	0.999882007	1	2.0999	29.44
438	MSTRG.10672.3_4	-1535.224844	0.6157	-1518.175023	0.2101	-1476.070683	101.6302	34.099642	3.94E-08	1.09E-06	0.2101	90
439	MSTRG.10679.1_2	-361.735111	0.732	-361.735111	0.732	-361.735111	0.732	0	1	1	0.732	6.65
440	MSTRG.10684.1_2	-410.578592	0.5661	-410.547707	0.6082	-410.547707	0.6082	0.06177	0.969587069	1	0.5661	29.44
441	MSTRG.10685.1_6	-767.831926	0.7039	-766.382998	0.7488	-766.149357	0.9544	2.897856	0.234821882	0.778629611	0.7039	29.44
442	MSTRG.10693.1_1	-248.025356	1.3919	-248.099266	1	-248.025356	1.3919	-0.14782	1	1	1.3919	29.44
443	MSTRG.10695.1_7	-404.665461	1.7121	-404.792384	1	-404.665461	1.7121	-0.253846	1	1	1.7121	29.44
444	MSTRG.107.2_13	-3464.522145	0.1125	-3464.522551	0.1125	-3464.522773	0.114	-0.000812	1	1	0.1125	90
445	MSTRG.107.3_18	-3669.3747	0.6755	-3661.002415	0.2536	-3614.171038	15.6828	16.74457	0.000231187	0.002401608	0.2536	90
446	MSTRG.107.4_22	-3487.550851	0.1426	-3487.550825	0.1426	-3487.550824	0.1426	5.20E-05	0.999974	1	0.1426	90
447	MSTRG.107.5_12	-949.61255	2.1	-949.612532	1	-949.612477	0	3.60E-05	0.999982	1	2.1	90
448	MSTRG.10714.1_3	-310.808405	0.7266	-306.376738	0.3522	-303.557414	2.8199	8.863334	0.011894645	0.068606413	0.3522	29.44
449	MSTRG.10715.2_2	-1865.062613	0.1049	-1865.062615	0.1049	-1865.062613	0.1049	-4.00E-06	1	1	0.1049	90
450	MSTRG.10720.1_1	-360.272158	0.9995	-354.230708	0.521	-339.613329	381.4742	12.0829	0.002378108	0.017986728	0.521	29.44
451	MSTRG.10724.1_6	-395.827201	0.6486	-395.149458	0.6129	-394.802226	0.9739	1.355486	0.507761718	1	0.6486	29.44
452	MSTRG.10725.1_2	-606.099175	0.3522	-604.260615	0.5022	-603.769122	3.2066	3.67712	0.159046288	0.571340503	0.3522	29.44
453	MSTRG.10727.1_5	-352.638257	0.1824	-351.891674	0.6185	-351.891674	0.6185	1.493166	0.47398339	1	0.1824	29.44
454	MSTRG.10728.1_2	-250.036947	0.2819	-248.206623	0.4078	-248.206623	0.4078	3.660648	0.160361602	0.574646734	0.2819	29.44
455	MSTRG.10738.13_5	-2946.807823	0.2942	-2946.807824	0.2942	-2946.807823	0.2942	-2.00E-06	1	1	0.2942	90
456	MSTRG.10742.1_11	-709.449029	0.8562	-709.449029	0.8562	-709.449029	0.8562	0	1	1	0.8562	90
457	MSTRG.10744.1_1	-309.149406	0.6245	-308.841882	0.6835	-308.837985	0.7157	0.615048	0.735265221	1	0.6245	29.44
458	MSTRG.10747.7_1	-2425.500033	0.6255	-2421.37552	0.3951	-2405.078402	26.1616	8.249026	0.016171368	0.088285237	0.3951	90
459	MSTRG.10750.1_3	-773.20828	1.0232	-767.254622	0.5909	-755.849993	28.3145	11.907316	0.002596326	0.019318324	0.5909	29.44
460	MSTRG.10752.1_4	-441.490162	0.4032	-441.490163	0.4032	-441.490162	0.4032	-2.00E-06	1	1	0.4032	6.65
461	MSTRG.10753.1_1	-152.356222	0.2258	-152.356222	0.2258	-152.356427	0.2258	0	1	1	0.2258	6.65
462	MSTRG.10754.1_1	-159.246907	999	-159.890887	1	-159.246907	999	-1.28796	1	1	999	6.65
463	MSTRG.10757.1_8	-914.078039	0.6648	-911.121682	0.574	-908.666703	5.2945	5.912714	0.052008038	0.229693119	0.6648	29.44
464	MSTRG.10768.1_12	-2225.19914	0.6384	-2221.806812	0.7072	-2219.088648	2.0275	6.784656	0.033630294	0.160634201	0.6384	90
465	MSTRG.10770.44_7	-4982.275359	0.0053	-4981.287403	0.5744	-4981.287403	0.5744	1.975912	0.372336971	1	0.0053	90
466	MSTRG.10770.63_4	-186.885311	0.4871	-186.885311	0.4871	-186.885311	0.4871	0	1	1	0.4871	90
467	MSTRG.10781.10_1	-1090.331296	0.2355	-1090.331296	0.2355	-1090.387443	0.2518	0	1	1	0.2355	90
468	MSTRG.10781.9_1	-1090.331296	0.2355	-1090.331296	0.2355	-1090.331296	0.2355	0	1	1	0.2355	90
469	MSTRG.10782.2_2	-429.548525	1.4127	-429.265659	0.6077	-420.450883	62.2913	0.565732	0.753620766	1	1.4127	90
470	MSTRG.10785.1_1	-161.923762	0.295	-161.923763	0.295	-161.923762	0.295	-2.00E-06	1	1	0.295	29.44
471	MSTRG.10786.2_1	-1133.103677	999	-1134.107523	1	-1133.103738	951.5003	-2.007692	1	1	999	90
472	MSTRG.10788.5_7	-4531.273832	0.2608	-4527.940412	0.6418	-4527.940412	0.6418	6.66684	0.035670902	0.1681201	0.2608	90
473	MSTRG.10788.6_5	-16910.91138	0.2981	-16909.73715	0.2724	-16909.73715	0.2725	2.348474	0.309054698	0.971784081	0.2981	90
474	MSTRG.10792.16_1	-3197.155466	0.534	-3186.780984	0.4755	-3167.644334	200.9902	20.748964	3.12E-05	0.000415109	0.4755	90
475	MSTRG.10793.1_2	-271.087529	0.7248	-270.899277	0.6935	-270.831869	0.8587	0.376504	0.828405923	1	0.7248	6.65
476	MSTRG.10795.1_2	-267.622767	0.1891	-267.622768	0.1891	-267.622767	0.1891	-2.00E-06	1	1	0.1891	29.44
477	MSTRG.10797.1_2	-331.416534	1.428	-331.561908	1	-328.754308	27.7312	-0.290748	1	1	1.428	29.44
478	MSTRG.10803.2_8	-4700.587439	0.6411	-4668.271131	0.5807	-4644.233466	122.8761	64.632616	9.23E-15	9.57E-13	0.5807	90
479	MSTRG.10804.2_17	-1249.363671	0.4263	-1235.268319	0.3126	-1207.001032	132.7551	28.190704	7.56E-07	1.53E-05	0.3126	90
480	MSTRG.10807.1_5	-2717.338023	0.0512	-2716.132886	0.2483	-2716.132886	0.2483	2.410274	0.299650945	0.949822555	0.0512	90
481	MSTRG.10820.1_1	-617.754243	1.0581	-617.763119	1	-612.836634	172.8828	-0.017752	1	1	1.0581	29.44
482	MSTRG.10821.1_17	-1372.96496	1.3442	-1372.592814	0.7315	-1366.501513	7.4096	0.744292	0.689253604	1	1.3442	29.44
483	MSTRG.10822.1_3	-819.176177	1.00E-04	-819.175571	0	-819.175402	0	0.001212	0.999394184	1	1.00E-04	90
484	MSTRG.10824.1_3	-1276.62875	0.3357	-1248.776303	0.6983	-1248.82189	0.6524	55.704894	8.01E-13	5.89E-11	0.6983	29.44
485	MSTRG.10825.1_1	-395.99729	2.5552	-396.445752	1	-395.99729	2.5552	-0.896924	1	1	2.5552	6.65
486	MSTRG.10826.1_10	-963.698733	0.6093	-954.879158	0.6345	-947.144588	14.9138	17.63915	0.000147811	0.001626389	0.6345	29.44
487	MSTRG.10832.1_1	-821.342311	0.5693	-811.015351	0.2744	-787.796387	155.1115	20.65392	3.27E-05	0.000433406	0.2744	90
488	MSTRG.10832.2_10	-612.283647	1.0334	-612.284394	1	-612.283647	1.0334	-0.001494	1	1	1.0334	29.44
489	MSTRG.10832.6_16	-565.575235	999	-566.038069	1	-565.578751	188.2194	-0.925668	1	1	999	15.76
490	MSTRG.10834.2_17	-612.283647	1.0334	-612.284394	1	-612.283647	1.0334	-0.001494	1	1	1.0334	29.44
491	MSTRG.10842.1_1	-168.546113	1.00E-04	-168.546113	0	-168.546113	0	0	1	1	1.00E-04	9.06
492	MSTRG.10853.1_1	-340.935636	0.7246	-337.277598	0.4423	-328.845192	232.7971	7.316076	0.025783049	0.129281918	0.7246	15.76
493	MSTRG.10854.1_1	-409.991507	0.6105	-409.525681	0.677	-408.183639	24.0769	0.931652	0.62761648	1	0.6105	29.44
494	MSTRG.10856.1_1	-377.254302	1.142	-377.06146	0.859	-375.805073	2.5708	0.385684	0.824612253	1	1.142	29.44
495	MSTRG.10858.3_2	-868.793283	0.898	-865.441672	0.5312	-845.631336	141.2682	6.703222	0.035027879	0.165812212	0.898	9.06
496	MSTRG.10860.1_5	-4956.737912	0.149	-4956.737914	0.149	-4956.737912	0.149	-4.00E-06	1	1	0.149	90
497	MSTRG.10861.1_1	-349.166112	0.8948	-343.292784	0.5215	-336.633977	394.36	11.746656	0.002813494	0.020630667	0.5215	15.76
498	MSTRG.10869.1_5	-1028.46953	0.86	-1022.959011	0.8015	-1020.619083	2.5474	11.021038	0.004044008	0.027968126	0.8015	29.44
499	MSTRG.10870.1_1	-612.455981	1.0222	-612.197685	0.9161	-609.894979	89.4994	0.516592	0.772366578	1	1.0222	90
500	MSTRG.10872.1_2	-207.904023	181.5832	-208.069444	1	-207.903873	213.7168	-0.330842	1	1	181.5832	15.76
501	MSTRG.10873.1_3	-513.647574	1.9795	-512.165509	0.3081	-502.065757	37.9823	2.96413	0.227168102	0.758766141	1.9795	6.65
502	MSTRG.10874.1_2	-622.635332	0.8896	-617.138304	0.4124	-597.138789	151.1341	10.994056	0.004098935	0.028291347	0.4124	90
503	MSTRG.10877.1_1	-434.570893	0.3291	-434.570894	0.3291	-434.570893	0.3291	-2.00E-06	1	1	0.3291	6.65
504	MSTRG.10879.1_1	-384.510796	0.5066	-384.353039	0.5708	-384.353039	0.5708	0.315514	0.854057293	1	0.5066	29.44
505	MSTRG.10883.1_9	-1597.73316	0.8265	-1586.428987	0.5496	-1552.424001	70.711	22.608346	1.23E-05	0.000183047	0.5496	90
506	MSTRG.10883.16_1	-1334.482668	0.1748	-1334.482671	0.1748	-1334.482668	0.1748	-6.00E-06	1	1	0.1748	90
507	MSTRG.10883.23_5	-2107.531133	0.0631	-2107.531136	0.0631	-2107.531133	0.0631	-6.00E-06	1	1	0.0631	90
508	MSTRG.10883.35_5	-2498.766447	0.5325	-2477.59395	0.2903	-2436.193402	86.5453	42.344994	6.38E-10	2.67E-08	0.2903	90
509	MSTRG.10883.52_1	-536.791822	0.7382	-536.181773	0.7108	-532.826622	12.1762	1.220098	0.543324246	1	0.7382	29.44
510	MSTRG.10883.54_21	-2468.989288	0.4676	-2468.98929	0.4676	-2468.989288	0.4676	-4.00E-06	1	1	0.4676	90
511	MSTRG.10883.6_9	-1597.73316	0.8265	-1586.428987	0.5496	-1552.424001	70.7111	22.608346	1.23E-05	0.000183047	0.5496	90
512	MSTRG.10883.71_5	-2308.000181	0.9119	-2303.738552	0.5801	-2291.645058	2.4038	8.523258	0.014099316	0.078970354	0.5801	90
513	MSTRG.10886.1_9	-1403.094827	0.9327	-1402.164463	0.7028	-1396.358876	10.3172	1.860728	0.394410119	1	0.9327	90
514	MSTRG.10888.2_17	-797.733479	4.3083	-799.260264	1	-793.891169	6.6001	-3.05357	1	1	4.3083	9.06
515	MSTRG.10890.4_3	-2813.852464	0.1852	-2813.852466	0.1852	-2813.852464	0.1852	-4.00E-06	1	1	0.1852	90
516	MSTRG.10893.1_32	-559.15972	0.4893	-559.091102	0.5427	-558.97392	0.8921	0.137236	0.933683279	1	0.4893	6.65
517	MSTRG.10895.1_1	-2655.084288	0.7795	-2654.842919	0.7455	-2651.829252	2.0674	0.482738	0.785551704	1	0.7795	29.44
518	MSTRG.10896.1_2	-2567.340258	1.1774	-2567.385825	1	-2567.340258	1.1774	-0.091134	1	1	1.1774	29.44
519	MSTRG.10897.1_1	-223.474535	999	-223.892453	1	-223.474692	951.3011	-0.835836	1	1	999	29.44
520	MSTRG.10900.4_2	-2219.871887	1.8447	-2208.479613	0.7357	-2208.479613	0.7357	22.784548	1.13E-05	0.000170119	0.7357	90
521	MSTRG.10902.1_8	-889.427569	0.5852	-884.290741	0.5986	-883.588539	0.8142	10.273656	0.0058763	0.0380978	0.5986	6.65
522	MSTRG.10904.1_1	-459.171484	0.9452	-456.831799	0.7299	-452.159141	12.2456	4.67937	0.096357986	0.379741654	0.9452	29.44
523	MSTRG.10905.1_1	-281.264201	0.4305	-281.264205	0.4305	-281.264201	0.4305	-8.00E-06	1	1	0.4305	29.44
524	MSTRG.10910.1_6	-544.811198	1.6977	-544.930427	1	-544.811198	1.6977	-0.238458	1	1	1.6977	6.65
525	MSTRG.10915.1_1	-247.996607	0.9522	-246.513446	0.5977	-242.462658	37.1828	2.966322	0.226919262	0.758249405	0.9522	29.44
526	MSTRG.10916.1_1	-878.550732	1.5677	-879.370196	1	-868.710587	13.398	-1.638928	1	1	1.5677	29.44
527	MSTRG.10926.2_3	-384.99263	999	-385.881845	1	-384.992934	951.4933	-1.77843	1	1	999	29.44
528	MSTRG.10932.1_4	-562.99808	0.4055	-562.998081	0.4055	-562.99808	0.4055	-2.00E-06	1	1	0.4055	29.44
529	MSTRG.10933.2_1	-1034.742417	0.1291	-1034.742719	0.1291	-1034.742417	0.1291	-0.000604	1	1	0.1291	90
530	MSTRG.10946.9_6	-3770.631281	0.7132	-3762.703758	0.2671	-3717.041897	30.8385	15.855046	0.000360679	0.003535754	0.2671	90
531	MSTRG.10959.3_5	-2206.150256	0.134	-2205.597549	0.3294	-2205.597558	0.4071	1.105414	0.575390119	1	0.134	90
532	MSTRG.10962.5_24	-1038.913386	999	-1039.343956	1	-1038.913534	951.4855	-0.86114	1	1	999	90
533	MSTRG.10968.1_9	-480.972242	1.749	-476.777531	0.0116	-476.777522	0.0116	8.389422	0.015075099	0.083310791	0.0116	29.44
534	MSTRG.10969.1_6	-347.905339	1.00E-04	-347.904749	0	-347.904686	0	0.00118	0.999410174	1	1.00E-04	29.44
535	MSTRG.10970.1_2	-231.275276	999	-231.648692	1	-231.275276	999	-0.746832	1	1	999	29.44
536	MSTRG.10971.1_18	-354.736498	999	-355.822169	1	-351.692053	32.3121	-2.171342	1	1	999	29.44
537	MSTRG.10972.1_3	-247.482252	1.6572	-247.789249	1	-246.835998	1.984	-0.613994	1	1	1.6572	29.44
538	MSTRG.10974.2_3	-1126.091784	0.4364	-1113.047795	0.4955	-1102.056798	8.1376	26.087978	2.16E-06	3.88E-05	0.4955	29.44
539	MSTRG.10981.1_2	-415.199077	2.1	-415.199075	0.8175	-415.199048	0	4.00E-06	0.999998	1	2.1	29.44
540	MSTRG.10983.1_1	-341.409264	0.022	-339.481342	0.7029	-339.481342	0.7029	3.855844	0.14545013	0.531708571	0.022	9.06
541	MSTRG.10984.3_2	-349.437333	0.454	-345.125705	0.4058	-338.309982	137.5885	8.623256	0.013411698	0.075680038	0.4058	15.76
542	MSTRG.10997.1_1	-131.855873	1.00E-04	-131.855739	0	-131.85572	0	0.000268	0.999866009	1	1.00E-04	29.44
543	MSTRG.110.11_13	-1039.195376	0.3672	-1039.195377	0.3672	-1039.195376	0.3672	-2.00E-06	1	1	0.3672	90
544	MSTRG.110.2_3	-1796.415733	0.272	-1796.415961	0.272	-1796.41596	0.272	-0.000456	1	1	0.272	90
545	MSTRG.11005.1_1	-335.481865	1.3313	-335.602937	1	-335.481865	1.3313	-0.242144	1	1	1.3313	29.44
546	MSTRG.11007.1_1	-217.876576	359.3989	-217.87659	0.6322	-217.876576	56.4694	-2.80E-05	1	1	359.3989	15.76
547	MSTRG.11011.1_1	-188.620959	0.2519	-188.62096	0.2519	-188.620959	0.2519	-2.00E-06	1	1	0.2519	29.44
548	MSTRG.11012.1_4	-441.808799	999	-442.241529	1	-441.808954	951.4427	-0.86546	1	1	999	29.44
549	MSTRG.11028.4_2	-1231.638122	1.00E-04	-1231.638014	0	-1231.637996	0	0.000216	0.999892006	1	1.00E-04	90
550	MSTRG.11034.1_16	-918.452192	0.6649	-916.48541	0.6951	-913.892782	7.4897	3.933564	0.139906351	0.514018559	0.6649	29.44
551	MSTRG.11045.1_2	-324.930257	0.5232	-321.280594	0.5925	-316.503186	99.4076	7.299326	0.025999889	0.130122464	0.5232	29.44
552	MSTRG.11055.1_2	-286.131809	0.3711	-285.161625	0.3484	-284.755379	0.5562	1.940368	0.379013293	1	0.3711	29.44
553	MSTRG.11056.1_1	-2037.919035	0.5539	-2030.575613	0.658	-2026.077062	10.9283	14.686844	0.000646833	0.005827835	0.658	29.44
554	MSTRG.11057.1_1	-470.516225	0.6423	-469.66224	0.6256	-467.428409	8.6195	1.70797	0.425715073	1	0.6423	29.44
555	MSTRG.11058.1_1	-217.876732	2.1	-217.876701	0	-217.87672	0.8687	6.20E-05	0.999969	1	2.1	15.76
556	MSTRG.11058.1_1	-217.876732	2.1	-217.876701	0	-217.87672	0.8687	6.20E-05	0.999969	1	2.1	15.76
557	MSTRG.11064.3_4	-1476.718888	1.4295	-1472.742962	0.3191	-1445.838953	14.5607	7.951852	0.01876192	0.099600606	0.3191	90
558	MSTRG.11066.1_3	-320.596815	0.2538	-318.866233	0.3248	-316.914733	4.648	3.461164	0.17718126	0.623464665	0.2538	29.44
559	MSTRG.11067.14_5	-1529.924056	0.4092	-1529.924056	0.4092	-1529.924056	0.4092	0	1	1	0.4092	90
560	MSTRG.11071.1_3	-242.848097	999	-243.616838	1	-239.779619	135.7405	-1.537482	1	1	999	29.44
561	MSTRG.11075.1_2	-1471.528976	0.1707	-1471.528976	0.1707	-1471.528976	0.1707	0	1	1	0.1707	90
562	MSTRG.11076.7_4	-2227.590707	0.1687	-2227.590708	0.1687	-2227.590707	0.1687	-2.00E-06	1	1	0.1687	90
563	MSTRG.11077.1_7	-2170.800943	0.3726	-2170.800944	0.3726	-2170.800949	0.3728	-2.00E-06	1	1	0.3726	90
564	MSTRG.11079.1_1	-417.285626	0.7977	-417.260984	0.8164	-417.260982	0.817	0.049284	0.975659135	1	0.7977	29.44
565	MSTRG.11081.1_1	-299.953445	0.5922	-299.335664	0.6606	-299.31871	0.7184	1.235562	0.539139462	1	0.5922	29.44
566	MSTRG.11097.1_8	-375.496299	1.00E-04	-375.496191	0	-375.496173	0	0.000216	0.999892006	1	1.00E-04	29.44
567	MSTRG.111.1_4	-640.527417	0.6906	-640.527417	0.6906	-640.527417	0.6906	0	1	1	0.6906	29.44
568	MSTRG.11115.10_7	-10661.47461	0.2284	-10661.47461	0.2283	-10661.47461	0.2283	-2.00E-06	1	1	0.2284	90
569	MSTRG.11121.1_1	-218.668528	1.00E-04	-218.668384	0	-218.668364	0	0.000288	0.99985601	1	1.00E-04	29.44
570	MSTRG.11132.3_3	-2305.722426	0.1023	-2305.67466	0.1031	-2305.679	0.1048	0.095532	0.953356846	1	0.1023	90
571	MSTRG.11149.1_2	-180.878741	63.8802	-180.878764	0.7066	-180.878743	12.928	-4.60E-05	1	1	63.8802	6.65
572	MSTRG.11151.1_2	-268.981465	0.676	-268.981465	0.676	-268.981465	0.676	0	1	1	0.676	29.44
573	MSTRG.11152.12_3	-2685.006377	1.2627	-2685.048568	1	-2685.006377	1.2627	-0.084382	1	1	1.2627	90
574	MSTRG.11154.1_4	-455.841266	0.6106	-455.841266	0.6106	-455.841266	0.6106	0	1	1	0.6106	15.76
575	MSTRG.11156.1_15	-707.66014	0.6779	-705.391005	0.675	-704.751099	1.0398	4.53827	0.103401584	0.402476634	0.6779	29.44
576	MSTRG.11157.1_16	-863.645119	0.007	-859.21352	0.6919	-858.93358	3.6818	8.863198	0.011895454	0.068606413	0.6919	29.44
577	MSTRG.11162.1_7	-288.833483	1.00E-04	-288.833345	0	-288.833325	0	0.000276	0.99986201	1	1.00E-04	29.44
578	MSTRG.11164.2_3	-409.25574	0.7814	-403.754966	0.3386	-395.039056	24.6395	11.001548	0.00408361	0.02820397	0.3386	29.44
579	MSTRG.11166.1_3	-211.191071	999	-211.976386	1	-211.191071	999	-1.57063	1	1	999	29.44
580	MSTRG.11167.1_27	-780.827241	0.6342	-780.827241	0.6342	-780.827241	0.6342	0	1	1	0.6342	29.44
581	MSTRG.11169.1_3	-272.43475	1.00E-04	-272.434635	0	-272.434617	0	0.00023	0.999885007	1	1.00E-04	15.76
582	MSTRG.11171.4_6	-1827.490048	0.1054	-1827.490409	0.1053	-1827.490414	0.1054	-0.000722	1	1	0.1054	90
583	MSTRG.11174.10_2	-2232.566854	0.2783	-2227.680772	0.1726	-2210.734741	20.8579	9.772164	0.007550949	0.046941032	0.1726	90
584	MSTRG.11179.1_12	-2054.067824	0.72	-2053.860258	0.6783	-2052.626433	4.641	0.415132	0.812559611	1	0.72	90
585	MSTRG.11181.1_4	-815.262138	0.7068	-808.005531	0.4196	-796.558734	112.1085	14.513214	0.000705498	0.006270926	0.4196	29.44
586	MSTRG.11183.1_6	-414.195615	0.6349	-413.766967	0.6173	-413.634111	0.789	0.857296	0.651389178	1	0.6349	90
587	MSTRG.11185.1_1	-408.351467	999	-409.153207	1	-408.351467	999	-1.60348	1	1	999	29.44
588	MSTRG.11187.1_2	-510.719888	0.7506	-510.719888	0.7506	-509.095679	101.6867	0	1	1	0.7506	29.44
589	MSTRG.11189.1_24	-372.69527	999	-373.944454	1	-372.69527	999	-2.498368	1	1	999	9.06
590	MSTRG.11190.1_1	-193.551467	1.00E-04	-193.55132	0	-193.551298	0	0.000294	0.999853011	1	1.00E-04	6.65
591	MSTRG.11191.1_28	-1066.783204	0.6735	-1066.783204	0.6735	-1066.783204	0.6735	0	1	1	0.6735	90
592	MSTRG.11192.1_1	-521.867407	0.4483	-521.651207	0.508	-521.633411	0.5436	0.4324	0.805574171	1	0.4483	29.44
593	MSTRG.11193.1_2	-310.154206	283.6669	-310.560933	1	-310.154689	280.761	-0.813454	1	1	283.6669	9.06
594	MSTRG.11194.2_1	-556.784155	0.3163	-556.783045	0.3194	-556.764826	0.4717	0.00222	0.998890616	1	0.3163	90
595	MSTRG.11197.8_1	-2043.417299	0.6212	-2033.972925	0.4167	-2016.503034	214.9677	18.888748	7.91E-05	0.000936804	0.4167	90
596	MSTRG.11209.2_3	-1599.482023	1.0499	-1598.837764	0.2662	-1595.050885	3.5237	1.288518	0.525051461	1	1.0499	90
597	MSTRG.11210.1_12	-812.35796	0.4222	-810.654521	0.6776	-810.654521	0.6776	3.406878	0.182056354	0.636954309	0.4222	29.44
598	MSTRG.11225.7_1	-213.765871	2.0999	-213.765828	0.2492	-213.765854	0.7723	8.60E-05	0.999957001	1	2.0999	90
599	MSTRG.11238.1_4	-590.358699	0.0035	-590.176014	0.1658	-590.176014	0.1659	0.36537	0.833030519	1	0.0035	90
600	MSTRG.11239.1_1	-226.438403	1.00E-04	-226.438274	0	-226.438255	0	0.000258	0.999871008	1	1.00E-04	15.76
601	MSTRG.11251.1_1	-258.977929	0.5426	-254.427549	0.4851	-250.998834	104.9938	9.10076	0.01056319	0.062179836	0.4851	29.44
602	MSTRG.11253.1_3	-592.457805	0.5792	-586.52823	0.6656	-583.843663	17.8464	11.85915	0.002659612	0.019721028	0.6656	29.44
603	MSTRG.11260.2_3	-2003.987479	0.1311	-2003.987777	0.1311	-2003.987775	0.1311	-0.000596	1	1	0.1311	90
604	MSTRG.11260.9_3	-2052.85027	0.1761	-2052.850527	0.1761	-2052.850526	0.1761	-0.000514	1	1	0.1761	90
605	MSTRG.11265.1_3	-428.278872	1.0489	-427.900628	0.5695	-425.875124	1.6245	0.756488	0.685063325	1	1.0489	6.65
606	MSTRG.11267.1_1	-522.25268	0.5584	-519.59358	0.5753	-514.362972	99.2666	5.3182	0.070011203	0.293052436	0.5584	29.44
607	MSTRG.11268.1_2	-518.132021	0.7711	-517.636742	0.7944	-517.619262	0.8483	0.990558	0.609400861	1	0.7711	90
608	MSTRG.11269.1_6	-352.372423	0.2611	-352.372424	0.2611	-352.372423	0.2611	-2.00E-06	1	1	0.2611	90
609	MSTRG.11270.1_1	-343.105535	0.4172	-339.48559	0.2979	-334.24986	12.0529	7.23989	0.02678415	0.133322043	0.4172	29.44
610	MSTRG.11275.1_3	-520.588789	0.6952	-520.588789	0.6952	-520.588789	0.6952	0	1	1	0.6952	9.06
611	MSTRG.11282.4_2	-780.701791	0.6579	-775.765384	0.2393	-760.011298	87.6648	9.872814	0.007180351	0.045007504	0.2393	90
612	MSTRG.11298.3_4	-3387.746882	1.00E-04	-3387.746264	0	-3387.746161	0	0.001236	0.999382191	1	1.00E-04	90
613	MSTRG.113.1_10	-2310.821513	0.9888	-2302.732415	0.5518	-2264.864509	85.9101	16.178196	0.000306866	0.003085437	0.5518	29.44
614	MSTRG.11302.1_1	-515.082387	0.2709	-515.082401	0.2709	-515.082387	0.2709	-2.80E-05	1	1	0.2709	6.65
615	MSTRG.11304.1_1	-467.848329	0.4266	-465.570526	0.7704	-465.566885	0.8648	4.555606	0.102509172	0.399433554	0.4266	90
616	MSTRG.11311.1_1	-1308.044443	1.00E-04	-1308.043988	0	-1308.043884	0	0.00091	0.999545103	1	1.00E-04	90
617	MSTRG.11322.6_5	-2870.020887	0.009	-2857.086505	0.7539	-2882.162898	1	25.868764	2.41E-06	4.28E-05	0.7539	90
618	MSTRG.11332.2_8	-682.685025	1.1044	-682.688314	1	-682.685025	1.1044	-0.006578	1	1	1.1044	15.76
619	MSTRG.11333.1_5	-449.378815	1.00E-04	-449.378432	0	-449.378375	0	0.000766	0.999617073	1	1.00E-04	9.06
620	MSTRG.11335.1_7	-369.617107	0.3145	-369.617108	0.3145	-369.617107	0.3145	-2.00E-06	1	1	0.3145	9.06
621	MSTRG.11338.1_5	-382.311726	2.1	-382.311649	0	-382.311649	0	0.000154	0.999923003	1	2.1	29.44
622	MSTRG.11340.1_1	-801.140423	1.0043	-800.210199	0.8361	-799.226216	1.2957	1.860448	0.39446534	1	1.0043	29.44
623	MSTRG.11343.1_3	-316.537915	2.0999	-316.537823	0	-316.537891	0.5594	0.000184	0.999908004	1	2.0999	6.65
624	MSTRG.11347.1_4	-359.14758	0.3775	-354.167933	0.4018	-349.740746	17.5218	9.959294	0.00687649	0.04333397	0.4018	29.44
625	MSTRG.11350.7_3	-3535.5104	0.0087	-3534.095264	0.4495	-3534.095264	0.4495	2.830272	0.242892578	0.799625348	0.0087	90
626	MSTRG.11353.1_4	-283.650644	2.0999	-283.650596	0.1255	-283.650611	0.4945	9.60E-05	0.999952001	1	2.0999	6.65
627	MSTRG.11353.1_4	-283.650644	2.0999	-283.650596	0.1255	-283.650611	0.4945	9.60E-05	0.999952001	1	2.0999	6.65
628	MSTRG.11353.1_4	-283.650644	2.0999	-283.650596	0.1255	-283.650611	0.4945	9.60E-05	0.999952001	1	2.0999	6.65
629	MSTRG.11354.1_5	-332.98144	2.1	-332.981434	0.3114	-332.98142	0	1.20E-05	0.999994	1	2.1	29.44
630	MSTRG.11354.1_5	-332.98144	2.1	-332.981434	0.3114	-332.98142	0	1.20E-05	0.999994	1	2.1	29.44
631	MSTRG.11355.1_5	-584.476297	0.7814	-582.916982	0.7124	-581.240796	1.6849	3.11863	0.210280064	0.713468284	0.7814	29.44
632	MSTRG.11355.1_5	-584.476297	0.7814	-582.916982	0.7124	-581.240796	1.6849	3.11863	0.210280064	0.713468284	0.7814	29.44
633	MSTRG.11365.5_3	-1119.127419	0.2621	-1119.127874	0.262	-1119.127872	0.262	-0.00091	1	1	0.2621	90
634	MSTRG.11370.1_13	-368.727133	999	-368.914989	1	-368.727143	951.5328	-0.375712	1	1	999	29.44
635	MSTRG.11370.1_13	-368.727133	999	-368.914989	1	-368.727143	951.5328	-0.375712	1	1	999	29.44
636	MSTRG.11370.1_13	-368.727133	999	-368.914989	1	-368.727143	951.5328	-0.375712	1	1	999	29.44
637	MSTRG.11371.1_3	-911.434538	0.521	-909.763053	0.5454	-904.29846	114.0721	3.34297	0.187967726	0.652948645	0.521	90
638	MSTRG.11372.1_3	-617.094545	0.2777	-615.344881	0.2123	-609.26087	57.6967	3.499328	0.173832341	0.614029584	0.2777	29.44
639	MSTRG.11374.1_2	-690.124895	1.0571	-688.112157	0.3802	-679.205184	25.0674	4.025476	0.133622315	0.495209814	1.0571	90
640	MSTRG.11374.1_2	-690.124895	1.0571	-688.112157	0.3802	-679.205184	25.0674	4.025476	0.133622315	0.495209814	1.0571	90
641	MSTRG.11374.1_2	-690.124895	1.0571	-688.112157	0.3802	-679.205184	25.0674	4.025476	0.133622315	0.495209814	1.0571	90
642	MSTRG.11380.2_3	-1553.910654	2.0999	-1553.910571	0	-1553.91063	0.476	0.000166	0.999917003	1	2.0999	90
643	MSTRG.11380.2_3	-1553.910654	2.0999	-1553.910571	0	-1553.91063	0.476	0.000166	0.999917003	1	2.0999	90
644	MSTRG.11381.1_4	-283.650644	2.0999	-283.650576	0	-283.650534	0	0.000136	0.999932002	1	2.0999	6.65
645	MSTRG.11381.1_4	-283.650644	2.0999	-283.650576	0	-283.650534	0	0.000136	0.999932002	1	2.0999	6.65
646	MSTRG.11381.1_4	-283.650644	2.0999	-283.650576	0	-283.650534	0	0.000136	0.999932002	1	2.0999	6.65
647	MSTRG.11382.1_5	-584.476297	0.7814	-582.916982	0.7124	-581.240796	1.6849	3.11863	0.210280064	0.713468284	0.7814	29.44
648	MSTRG.11382.1_5	-584.476297	0.7814	-582.916982	0.7124	-581.240796	1.6849	3.11863	0.210280064	0.713468284	0.7814	29.44
649	MSTRG.11385.1_1	-193.80049	0.3972	-193.80049	0.3972	-193.80049	0.3972	0	1	1	0.3972	29.44
650	MSTRG.11392.1_7	-760.158984	0.8079	-752.685487	0.3664	-737.178719	12.9206	14.946994	0.000567939	0.005228348	0.3664	15.76
651	MSTRG.11392.1_7	-760.158984	0.8079	-752.685487	0.3664	-737.178719	12.9206	14.946994	0.000567939	0.005228348	0.3664	15.76
652	MSTRG.114.17_6	-1502.840382	0.2656	-1494.462071	0.1662	-1477.784001	16.0166	16.756622	0.000229798	0.002392407	0.1662	90
653	MSTRG.11411.1_2	-734.802501	0.642	-734.751124	0.6848	-734.66864	1.1373	0.102754	0.949920483	1	0.642	90
654	MSTRG.11423.1_2	-396.130627	0.5637	-396.130818	0.5636	-396.130818	0.5635	-0.000382	1	1	0.5637	6.65
655	MSTRG.11424.1_2	-351.388477	999	-351.806488	1	-351.388619	952.1527	-0.836022	1	1	999	29.44
656	MSTRG.11427.1_5	-451.624028	0.2098	-451.624029	0.2098	-451.624028	0.2098	-2.00E-06	1	1	0.2098	29.44
657	MSTRG.11438.1_2	-152.102628	2.0995	-152.102624	0.2242	-152.102623	0.6212	8.00E-06	0.999996	1	2.0995	29.44
658	MSTRG.11467.1_5	-334.149561	999	-334.57248	1	-334.149708	951.5965	-0.845838	1	1	999	29.44
659	MSTRG.11487.2_6	-4078.392547	0.4281	-4048.68488	0.1912	-3963.892378	36.4934	59.415334	1.25E-13	1.07E-11	0.1912	90
660	MSTRG.11492.1_3	-550.857098	1.9628	-547.916929	0.012	-547.916924	0.012	5.880338	0.052856795	0.2325677	1.9628	29.44
661	MSTRG.11495.5_1	-244.174202	999	-244.559694	1	-244.174349	951.4402	-0.770984	1	1	999	29.44
662	MSTRG.11496.1_3	-271.747592	0.1794	-264.358835	0.1537	-256.543402	77.7917	14.777514	0.000618164	0.005621388	0.1537	29.44
663	MSTRG.11504.5_13	-1064.429703	0.4265	-1063.76955	0.6805	-1063.765968	0.7498	1.320306	0.516772262	1	0.4265	29.44
664	MSTRG.11513.1_2	-393.741993	0.4674	-391.564299	0.5466	-389.910551	67.294	4.355388	0.113302505	0.433752171	0.4674	29.44
665	MSTRG.11522.1_1	-287.103167	0.662	-281.416513	0.5543	-274.775166	114.8551	11.373308	0.00339092	0.024047909	0.5543	29.44
666	MSTRG.11523.1_2	-540.897955	0.5138	-533.736095	0.6067	-526.958559	116.0077	14.32372	0.000775611	0.006805492	0.6067	29.44
667	MSTRG.11524.3_1	-241.846663	2.2251	-242.419623	1	-236.752811	14.8971	-1.14592	1	1	2.2251	29.44
668	MSTRG.11527.8_3	-4492.963317	1.0265	-4486.495622	0.2955	-4459.888946	14.1336	12.93539	0.001552801	0.012438281	0.2955	90
669	MSTRG.11538.1_2	-278.319562	0.3772	-278.31957	0.3772	-278.319562	0.3772	-1.60E-05	1	1	0.3772	29.44
670	MSTRG.11539.1_7	-410.529544	0.5183	-410.529716	0.5183	-410.529716	0.5183	-0.000344	1	1	0.5183	15.76
671	MSTRG.11547.1_1	-390.730575	1.1692	-390.747328	1	-390.730575	1.1692	-0.033506	1	1	1.1692	29.44
672	MSTRG.11553.1_4	-435.124923	0.2445	-435.124924	0.2445	-435.124923	0.2445	-2.00E-06	1	1	0.2445	6.65
673	MSTRG.11555.1_1	-180.878806	2.1	-180.878792	0	-180.878782	0	2.80E-05	0.999986	1	2.1	90
674	MSTRG.11560.1_3	-381.008374	0.6145	-380.666648	0.6341	-380.546579	0.8107	0.683452	0.710542867	1	0.6145	29.44
675	MSTRG.11562.1_1	-761.76331	1.429	-762.261534	1	-761.76331	1.429	-0.996448	1	1	1.429	29.44
676	MSTRG.11569.1_2	-259.311892	0.2904	-259.311892	0.2904	-259.311892	0.2904	0	1	1	0.2904	90
677	MSTRG.11579.1_1	-412.608312	1.0834	-412.57143	0.9077	-412.310748	1.1967	0.073764	0.963789856	1	1.0834	29.44
678	MSTRG.11580.1_3	-264.94868	999	-265.703864	1	-264.948982	951.4255	-1.510368	1	1	999	90
679	MSTRG.11582.1_2	-374.259404	999	-374.946545	1	-374.259445	951.4381	-1.374282	1	1	999	6.65
680	MSTRG.11584.3_16	-509.74876	2.1001	-509.748764	0.7236	-509.748746	1	-8.00E-06	1	1	2.1001	29.44
681	MSTRG.11586.3_2	-4389.280796	0.3007	-4389.280796	0.3007	-4389.280796	0.3007	0	1	1	0.3007	90
682	MSTRG.11587.5_3	-1353.712505	1.00E-04	-1353.712389	0	-1353.711581	0	0.000232	0.999884007	1	1.00E-04	90
683	MSTRG.11592.1_1	-586.382988	0.5906	-585.066192	0.6508	-581.825353	7.663	2.633592	0.267992576	0.866701506	0.5906	29.44
684	MSTRG.11596.10_16	-428.440103	0.4087	-427.937095	0.4968	-427.29565	21.0216	1.006016	0.604708957	1	0.4087	29.44
685	MSTRG.11596.7_2	-607.925407	0.5122	-604.583668	0.3472	-597.861314	118.6159	6.683478	0.035375386	0.167157985	0.5122	29.44
686	MSTRG.116.24_4	-4667.100651	0.7085	-4651.051182	0.792	-4649.182069	1.4639	32.098938	1.07E-07	2.68E-06	0.792	90
687	MSTRG.116.3_6	-5132.546507	0.643	-5120.377015	0.8067	-5120.189418	0.916	24.338984	5.19E-06	8.49E-05	0.8067	90
688	MSTRG.11613.15_3	-1404.09993	2.1047	-1404.353165	1	-1404.100478	2.1046	-0.50647	1	1	2.1047	90
689	MSTRG.11618.1_1	-127.437341	2.1	-127.437338	0.6096	-127.437338	0.529	6.00E-06	0.999997	1	2.1	29.44
690	MSTRG.11626.1_10	-2935.528272	0.5511	-2935.528273	0.5511	-2935.528272	0.5511	-2.00E-06	1	1	0.5511	90
691	MSTRG.11643.1_2	-316.432309	895.8489	-316.870208	1	-316.432277	952.3503	-0.875798	1	1	895.8489	90
692	MSTRG.11658.1_1	-192.283872	0.1425	-192.283872	0.1425	-192.283872	0.1425	0	1	1	0.1425	29.44
693	MSTRG.11683.15_6	-3950.681503	0.2013	-3950.681504	0.2013	-3950.681529	0.2014	-2.00E-06	1	1	0.2013	90
694	MSTRG.11688.1_6	-465.921689	1.4647	-465.982248	1	-465.921689	1.4647	-0.121118	1	1	1.4647	9.06
695	MSTRG.11703.1_4	-5000.083251	0.0173	-4984.423643	0.6139	-4982.769418	2.82	31.319216	1.58E-07	3.77E-06	0.6139	90
696	MSTRG.1171.38_10	-1962.894192	0.8043	-1959.277884	0.4181	-1934.427046	42.093	7.232616	0.026881741	0.133682	0.8043	90
697	MSTRG.11711.1_1	-543.43762	1.4419	-543.56605	0.8152	-540.815996	2.064	-0.25686	1	1	1.4419	29.44
698	MSTRG.11713.1_4	-504.037679	0.5319	-504.037857	0.5319	-504.037856	0.5319	-0.000356	1	1	0.5319	15.76
699	MSTRG.11719.6_2	-2082.202273	0.1839	-2082.202274	0.1839	-2082.202273	0.1839	-2.00E-06	1	1	0.1839	90
700	MSTRG.1172.9_4	-509.749362	2.0999	-509.749316	0.3236	-509.749152	0	9.20E-05	0.999954001	1	2.0999	90
701	MSTRG.11724.5_16	-12315.36619	0.3307	-12315.36619	0.3306	-12315.36619	0.3306	-2.00E-06	1	1	0.3307	90
702	MSTRG.1173.9_13	-2473.385995	0.7372	-2457.807614	0.3726	-2405.097678	110.6395	31.156762	1.72E-07	4.06E-06	0.3726	90
703	MSTRG.11731.2_2	-2598.942667	0.1456	-2598.942669	0.1456	-2598.942668	0.1456	-4.00E-06	1	1	0.1456	90
704	MSTRG.11743.1_1	-357.458259	0.5195	-351.555775	0.3658	-349.129451	1.3719	11.804968	0.002732648	0.020156617	0.3658	90
705	MSTRG.1175.1_1	-203.634667	0.4583	-203.295403	0.4839	-201.456779	17.9567	0.678528	0.712294379	1	0.4583	90
706	MSTRG.11753.1_5	-391.185642	1.0396	-391.186181	1	-391.185642	1.0396	-0.001078	1	1	1.0396	15.76
707	MSTRG.11754.14_3	-4800.038526	0.5188	-4800.038526	0.5188	-4800.038527	0.5188	0	1	1	0.5188	90
708	MSTRG.11758.3_1	-244.448265	999	-244.667177	1	-244.448278	951.4323	-0.437824	1	1	999	15.76
709	MSTRG.11759.1_4	-526.558227	999	-528.078902	1	-526.558227	999	-3.04135	1	1	999	29.44
710	MSTRG.1176.10_3	-1236.463952	0.9797	-1216.439159	0.348	-1165.227579	74.0354	40.049586	2.01E-09	7.50E-08	0.348	90
711	MSTRG.11761.1_2	-235.228467	0.7992	-235.228467	0.7992	-235.228467	0.7992	0	1	1	0.7992	15.76
712	MSTRG.11763.11_2	-1065.214327	0.7091	-1061.426274	0.3549	-1037.018671	53.3674	7.576106	0.022639638	0.116445794	0.7091	90
713	MSTRG.11768.1_3	-272.658341	999	-273.117821	1	-272.65849	951.6446	-0.91896	1	1	999	6.65
714	MSTRG.1177.2_8	-3396.688467	0.5489	-3390.229224	0.2215	-3357.007969	23.324	12.918486	0.001565981	0.012520152	0.2215	90
715	MSTRG.11785.7_11	-2968.498704	0.4475	-2968.498704	0.4475	-2968.498704	0.4475	0	1	1	0.4475	90
716	MSTRG.11787.1_4	-218.552696	0.8743	-218.552696	0.8743	-218.552696	0.8743	0	1	1	0.8743	29.44
717	MSTRG.11788.1_1	-288.547111	0.4178	-288.212997	0.4829	-288.210405	0.4997	0.668228	0.715972157	1	0.4178	29.44
718	MSTRG.1179.1_1	-258.411761	0.2821	-258.411783	0.2821	-258.411761	0.2821	-4.40E-05	1	1	0.2821	29.44
719	MSTRG.118.1_15	-1119.637452	1.9581	-1119.846043	1	-1119.637452	1.9581	-0.417182	1	1	1.9581	15.76
720	MSTRG.118.24_6	-729.344581	0.5114	-720.079726	0.5355	-715.300336	3.895	18.52971	9.47E-05	0.001095876	0.5355	29.44
721	MSTRG.11803.1_3	-637.585026	0.5493	-628.913187	0.3655	-612.756012	112.7851	17.343678	0.000171344	0.00185032	0.3655	6.65
722	MSTRG.11815.1_3	-2621.480009	0.0042	-2619.839978	0.2985	-2619.839979	0.2985	3.280062	0.193974029	0.669416082	0.0042	29.44
723	MSTRG.11822.1_1	-415.685489	0.3871	-406.928254	0.2485	-390.326565	170.9305	17.51447	0.000157319	0.001720124	0.2485	15.76
724	MSTRG.11828.5_1	-940.632756	1.0115	-940.632842	1	-940.632756	1.0115	-0.000172	1	1	1.0115	90
725	MSTRG.1183.6_10	-966.453883	0.5487	-964.631602	0.8964	-964.631652	0.9261	3.644562	0.161656591	0.578262629	0.5487	90
726	MSTRG.11835.6_1	-226.098512	2.1	-226.098408	0	-226.098408	0	0.000208	0.999896005	1	2.1	90
727	MSTRG.11836.1_4	-991.131996	0.5316	-984.703444	0.5182	-980.928609	2.9561	12.857104	0.001614787	0.01283759	0.5182	90
728	MSTRG.1184.1_1	-156.700954	1.00E-04	-156.700832	0	-156.700813	0	0.000244	0.999878007	1	1.00E-04	6.65
729	MSTRG.1185.2_5	-3490.691007	0.0053	-3490.118808	0.1521	-3490.118808	0.1521	1.144398	0.564283215	1	0.0053	90
730	MSTRG.11850.1_6	-624.852827	1.4456	-614.062791	0.7467	-613.261464	29.8318	21.580072	2.06E-05	0.000287895	0.7467	29.44
731	MSTRG.11856.1_1	-720.277823	0.4873	-716.040384	0.2937	-709.968101	55.8668	8.474878	0.014444537	0.080490429	0.2937	90
732	MSTRG.11857.1_1	-238.431158	2.1	-238.431084	0	-238.431084	0	0.000148	0.999926003	1	2.1	6.65
733	MSTRG.11866.1_3	-522.081959	2.0999	-522.081845	0	-522.081903	0.2676	0.000228	0.999886006	1	2.0999	15.76
734	MSTRG.11873.1_2	-412.550035	0.866	-404.37998	0.5885	-393.469066	493.4429	16.34011	0.000283002	0.002868671	0.5885	29.44
735	MSTRG.11874.1_2	-205.458	0.356	-205.458001	0.356	-205.458	0.356	-2.00E-06	1	1	0.356	6.65
736	MSTRG.11875.7_4	-5628.602897	0.006	-5624.341849	0.3756	-5624.341793	0.3754	8.522096	0.01410751	0.078974431	0.3756	90
737	MSTRG.11876.1_1	-147.991744	2.0999	-147.991721	0.125	-147.991669	0	4.60E-05	0.999977	1	2.0999	6.65
738	MSTRG.11878.7_17	-561.486445	999	-561.919444	1	-561.48659	952.0101	-0.865998	1	1	999	29.44
739	MSTRG.1188.1_6	-404.335891	1.00E-04	-404.335794	0	-404.335752	0	0.000194	0.999903005	1	1.00E-04	29.44
740	MSTRG.11880.1_1	-528.113301	0.7412	-519.948095	0.4287	-509.384712	17.8194	16.330412	0.000284378	0.002879855	0.4287	29.44
741	MSTRG.11883.12_3	-2247.063849	0.1619	-2247.06385	0.1619	-2247.063849	0.1619	-2.00E-06	1	1	0.1619	90
742	MSTRG.11885.4_2	-1031.323306	0.2062	-1031.323306	0.2062	-1031.323306	0.2062	0	1	1	0.2062	90
743	MSTRG.11889.5_3	-1647.939393	0.5602	-1628.351336	0.3149	-1597.741745	67.2338	39.176114	3.11E-09	1.10E-07	0.3149	90
744	MSTRG.1189.1_22	-642.591729	44.0126	-643.218332	1	-642.574626	999	-1.253206	1	1	44.0126	29.44
745	MSTRG.11897.2_1	-269.263965	0.5336	-267.951588	0.5782	-265.33645	8.9394	2.624754	0.269179456	0.869786373	0.5336	29.44
746	MSTRG.11897.3_2	-330.233708	999	-330.662697	1	-330.233859	951.5379	-0.857978	1	1	999	29.44
747	MSTRG.11898.1_3	-863.185878	0.4148	-860.825142	0.395	-857.290608	23.6747	4.721472	0.094350755	0.373586014	0.4148	90
748	MSTRG.1190.1_6	-771.233838	0.6576	-771.233838	0.6576	-771.233838	0.6576	0	1	1	0.6576	6.65
749	MSTRG.11902.12_6	-859.172638	1.5388	-845.224912	0.4092	-845.224912	0.4092	27.895452	8.76E-07	1.73E-05	0.4092	90
750	MSTRG.11903.2_1	-5426.617704	0.2698	-5426.617704	0.2698	-5426.617704	0.2698	0	1	1	0.2698	90
751	MSTRG.11905.1_1	-408.906687	1.7972	-408.103826	0.6028	-403.010685	3.2806	1.605722	0.448045271	1	1.7972	29.44
752	MSTRG.11907.1_7	-705.182013	0.4628	-705.182014	0.4629	-705.182013	0.4628	-2.00E-06	1	1	0.4628	90
753	MSTRG.1191.1_1	-595.338828	0.5694	-595.338828	0.5694	-595.338828	0.5694	0	1	1	0.5694	90
754	MSTRG.11914.16_1	-739.010624	0.68	-726.851182	0.5326	-709.98755	498.6121	24.318884	5.24E-06	8.57E-05	0.5326	29.44
755	MSTRG.11918.1_1	-293.046014	1.00E-04	-293.045907	0	-293.045889	0	0.000214	0.999893006	1	1.00E-04	29.44
756	MSTRG.11919.2_5	-3214.227119	0.1077	-3210.04734	0.5395	-3210.04734	0.5395	8.359558	0.015301889	0.084321818	0.5395	90
757	MSTRG.1192.1_4	-596.433185	1.3791	-596.472883	1	-596.433185	1.3791	-0.079396	1	1	1.3791	9.06
758	MSTRG.11921.1_1	-358.394621	1.864	-358.990511	1	-352.46441	257.1312	-1.19178	1	1	1.864	29.44
759	MSTRG.11923.1_3	-164.43526	2.0999	-164.43523	0	-164.43523	0	6.00E-05	0.99997	1	2.0999	6.65
760	MSTRG.11927.1_2	-514.159112	0.6436	-504.716804	0.4155	-485.557934	92.6684	18.884616	7.93E-05	0.000938217	0.4155	90
761	MSTRG.11927.2_2	-347.893297	1.00E-04	-347.8927	0	-347.892636	0	0.001194	0.999403178	1	1.00E-04	90
762	MSTRG.11928.1_5	-4678.599587	0.3237	-4678.599587	0.3237	-4678.599587	0.3237	0	1	1	0.3237	90
763	MSTRG.1193.21_10	-3190.126772	0.2483	-3181.141825	0.4293	-3182.627443	0.6635	17.969894	0.000125282	0.001397854	0.4293	90
764	MSTRG.11930.7_8	-3425.64968	0.0058	-3425.64347	0.1158	-3425.649681	0.0058	0.01242	0.993809242	1	0.0058	90
765	MSTRG.11940.1_1	-131.54816	1.00E-04	-131.548213	0.5337	-131.54816	0	-0.000106	1	1	1.00E-04	9.06
766	MSTRG.11941.1_15	-317.31957	0.3151	-317.319571	0.3151	-317.31957	0.3151	-2.00E-06	1	1	0.3151	90
767	MSTRG.11942.1_1	-129.303397	495.4257	-129.488189	1	-129.303329	592.6977	-0.369584	1	1	495.4257	6.65
768	MSTRG.11946.1_6	-650.307818	0.3664	-644.349689	0.2123	-636.635457	56.3651	11.916258	0.002584744	0.019260391	0.2123	29.44
769	MSTRG.11949.1_4	-362.745218	0.814	-362.005116	0.3081	-357.743666	31.8892	1.480204	0.477065252	1	0.814	15.76
770	MSTRG.11950.1_4	-472.732341	1.0704	-471.255639	0.3701	-465.962131	2.7875	2.953404	0.228389677	0.761478899	1.0704	29.44
771	MSTRG.11954.1_1	-872.139411	0.5767	-856.750102	0.3004	-824.623147	48.1655	30.778618	2.07E-07	4.83E-06	0.3004	90
772	MSTRG.1196.7_3	-559.439083	0.2616	-559.439327	0.2615	-559.43934	0.2618	-0.000488	1	1	0.2616	90
773	MSTRG.11967.1_4	-496.702336	0.3436	-496.702342	0.3436	-496.702336	0.3436	-1.20E-05	1	1	0.3436	29.44
774	MSTRG.11970.1_2	-498.463356	0.0083	-492.718508	0.7544	-491.555184	25.2515	11.489696	0.003199221	0.022965564	0.7544	90
775	MSTRG.11972.1_3	-620.175567	0.586	-620.175568	0.586	-620.175567	0.586	-2.00E-06	1	1	0.586	15.76
776	MSTRG.11986.2_6	-1335.62243	1.2931	-1335.647343	1	-1335.62243	1.293	-0.049826	1	1	1.2931	90
777	MSTRG.11989.1_1	-435.752996	2.1	-435.752992	0.5236	-435.752994	0.8625	8.00E-06	0.999996	1	2.1	6.65
778	MSTRG.1199.1_2	-1004.365203	0.5267	-1004.365383	0.5295	-1004.365374	0.5267	-0.00036	1	1	0.5267	90
779	MSTRG.11990.1_1	-343.477989	0.73	-343.477989	0.73	-343.477989	0.73	0	1	1	0.73	6.65
780	MSTRG.11993.30_1	-1071.944209	0.9443	-1070.277896	0.459	-1058.147622	49.7419	3.332626	0.188942414	0.655258485	0.9443	90
781	MSTRG.11995.1_1	-289.949928	1.6984	-289.638016	0.6406	-285.491261	6.6048	0.623824	0.732045945	1	1.6984	29.44
782	MSTRG.11997.1_6	-445.881332	948.8431	-446.939856	1	-445.881328	951.5167	-2.117048	1	1	948.8431	15.76
783	MSTRG.12001.1_2	-273.842291	0.4602	-272.933495	0.5752	-272.778666	0.8875	1.817592	0.403009155	1	0.4602	29.44
784	MSTRG.1201.12_5	-2854.763001	0.3187	-2850.074076	0.1831	-2832.159681	11.1183	9.37785	0.009196567	0.055428313	0.1831	90
785	MSTRG.1201.5_8	-2709.94856	0.4252	-2705.480583	0.164	-2695.658002	1.0364	8.935954	0.011470497	0.066518193	0.164	90
786	MSTRG.12017.30_2	-846.840783	2.0999	-846.840653	0	-846.840599	0	0.00026	0.999870008	1	2.0999	90
787	MSTRG.12020.3_5	-1576.639766	0.1216	-1573.888006	0.7384	-1573.888006	0.7384	5.50352	0.063815447	0.271359957	0.1216	90
788	MSTRG.12024.4_11	-7313.588823	0.1996	-7313.58961	0.1996	-7313.589461	0.1995	-0.001574	1	1	0.1996	90
789	MSTRG.12024.8_4	-1192.925796	0.2405	-1192.304174	0.8087	-1192.307809	0.6693	1.243244	0.537072599	1	0.2405	90
790	MSTRG.12025.1_1	-594.578926	1.0214	-593.421665	0.6659	-588.746632	131.5673	2.314522	0.314345997	0.984891818	1.0214	29.44
791	MSTRG.12028.1_2	-352.927856	0.6632	-351.436319	0.6266	-351.139909	0.9276	2.983074	0.225026524	0.753352763	0.6632	29.44
792	MSTRG.12029.1_1	-284.507705	0.6914	-284.44866	0.7217	-284.411579	0.8222	0.11809	0.942664348	1	0.6914	29.44
793	MSTRG.1203.1_7	-299.686876	999	-300.249557	1	-299.686909	951.4319	-1.125362	1	1	999	29.44
794	MSTRG.12030.9_3	-1836.931325	999	-1838.337144	1	-1829.74397	16.4691	-2.811638	1	1	999	90
795	MSTRG.12034.1_3	-1960.868587	0.3067	-1960.868587	0.3067	-1960.868587	0.3067	0	1	1	0.3067	90
796	MSTRG.12034.6_3	-1960.891806	0.3066	-1960.891806	0.3065	-1960.891806	0.3066	0	1	1	0.3066	90
797	MSTRG.12038.38_3	-3764.175851	1.00E-04	-3764.174081	0	-3764.173888	0	0.00354	0.998231566	1	1.00E-04	90
798	MSTRG.12040.1_2	-472.750852	2.1	-472.750853	1	-472.750852	1.9772	-2.00E-06	1	1	2.1	29.44
799	MSTRG.12048.7_5	-3720.512594	0.4361	-3720.512594	0.4361	-3720.512594	0.4361	0	1	1	0.4361	90
800	MSTRG.1205.1_4	-3679.232108	1.8854	-3652.26482	0.75	-3652.26482	0.75	53.934576	1.94E-12	1.33E-10	0.75	90
801	MSTRG.12051.1_3	-407.633184	1.1558	-407.678864	1	-403.642662	6.7039	-0.09136	1	1	1.1558	29.44
802	MSTRG.12052.1_4	-240.967221	0.5664	-240.967222	0.5664	-240.967221	0.5664	-2.00E-06	1	1	0.5664	29.44
803	MSTRG.12065.1_2	-588.773099	0.5977	-584.694608	0.3509	-580.270195	2.1524	8.156982	0.016932998	0.091662635	0.3509	29.44
804	MSTRG.12068.1_7	-1313.358066	0.823	-1308.153055	0.3627	-1279.022029	76.7114	10.410022	0.00548899	0.036061983	0.3627	29.44
805	MSTRG.12069.1_6	-559.627692	2.7354	-553.504268	0.197	-533.531694	90.6921	12.246848	0.002190941	0.016785938	0.197	15.76
806	MSTRG.12071.1_4	-244.30605	999	-244.421168	1	-244.306056	951.4283	-0.230236	1	1	999	29.44
807	MSTRG.12072.1_6	-363.739791	999	-364.187294	1	-363.739794	993.5396	-0.895006	1	1	999	15.76
808	MSTRG.12078.1_1	-398.755532	2.1	-398.755504	0	-398.755523	0.4718	5.60E-05	0.999972	1	2.1	90
809	MSTRG.12078.2_2	-684.825367	0.6594	-676.515561	0.2575	-657.48258	18.8105	16.619612	0.000246092	0.002528447	0.2575	29.44
810	MSTRG.12079.2_3	-549.165712	999	-549.602262	1	-549.165863	949.3767	-0.8731	1	1	999	29.44
811	MSTRG.12081.1_8	-602.161558	0.2498	-597.776701	0.1746	-587.871564	129.0679	8.769714	0.01246467	0.071094663	0.1746	6.65
812	MSTRG.12082.1_1	-269.103832	999	-270.043331	1	-269.103832	999	-1.878998	1	1	999	29.44
813	MSTRG.12083.1_1	-521.570728	0.6794	-520.195629	0.7572	-515.911629	179.019	2.750198	0.252814566	0.825996846	0.6794	29.44
814	MSTRG.12085.1_4	-418.504262	999	-420.286296	1	-418.504262	999	-3.564068	1	1	999	6.65
815	MSTRG.12086.14_3	-4061.735248	1.1847	-4061.745262	1	-4061.735891	1.1789	-0.020028	1	1	1.1847	90
816	MSTRG.12086.21_11	-1051.597561	0.3713	-1051.597561	0.3713	-1051.597561	0.3713	0	1	1	0.3713	90
817	MSTRG.12087.2_21	-1785.112384	0.6323	-1781.330245	0.3706	-1751.638173	50.0839	7.564278	0.022773926	0.116965866	0.6323	90
818	MSTRG.12089.1_7	-6433.45692	0.1101	-6432.166531	0.4183	-6432.166531	0.4182	2.580778	0.275163724	0.886146201	0.1101	90
819	MSTRG.12089.9_7	-10774.53972	0.1101	-10773.24933	0.4183	-10773.26265	0.4099	2.580776	0.275163999	0.886146201	0.1101	90
820	MSTRG.12092.1_3	-228.958246	999	-229.45556	1	-228.958275	951.4323	-0.994628	1	1	999	6.65
821	MSTRG.12093.11_5	-2053.070232	0.6299	-2053.070598	0.6299	-2053.070568	0.6299	-0.000732	1	1	0.6299	90
822	MSTRG.12095.1_2	-490.370381	0.6962	-487.523593	0.6909	-484.379604	25.4878	5.693576	0.058030416	0.251409675	0.6962	6.65
823	MSTRG.1210.1_5	-2203.936226	0.3757	-2203.936226	0.3757	-2203.936226	0.3758	0	1	1	0.3757	90
824	MSTRG.1210.12_1	-2581.250148	0.3995	-2573.711433	0.2408	-2547.566784	10.7494	15.07743	0.000532081	0.004952121	0.2408	90
825	MSTRG.1210.9_4	-2427.174311	0.1361	-2427.174311	0.1361	-2427.174311	0.1361	0	1	1	0.1361	90
826	MSTRG.12105.4_15	-1305.469596	0.6821	-1298.73352	0.1881	-1269.86359	40.3242	13.472152	0.001187297	0.009896481	0.1881	90
827	MSTRG.12107.1_5	-1334.618822	1.00E-04	-1334.618135	0	-1334.61806	0	0.001374	0.999313236	1	1.00E-04	90
828	MSTRG.12108.1_2	-2100.495422	1.00E-04	-2100.494693	0	-2100.494612	0	0.001458	0.999271266	1	1.00E-04	90
829	MSTRG.12108.11_4	-1187.737398	1.00E-04	-1187.737083	0	-1187.737009	0	0.00063	0.99968505	1	1.00E-04	90
830	MSTRG.12108.15_3	-2712.368563	0.4202	-2705.721983	0.2441	-2667.697997	36.0424	13.29316	0.001298455	0.010700748	0.2441	90
831	MSTRG.12118.1_5	-256.376496	0.2097	-256.007816	0.2917	-255.973387	0.3535	0.73736	0.691646702	1	0.2097	9.06
832	MSTRG.12125.1_3	-759.943466	0.0081	-759.89536	0.206	-759.943466	0.0081	0.096212	0.95303276	1	0.0081	29.44
833	MSTRG.12126.1_3	-325.892301	999	-326.270233	1	-325.892443	951.4339	-0.755864	1	1	999	6.65
834	MSTRG.12127.1_1	-480.972242	1.5589	-475.884613	0.0086	-475.884618	0.0086	10.175258	0.006172638	0.039598583	0.0086	29.44
835	MSTRG.12132.1_4	-220.088724	0.4892	-220.088724	0.4892	-220.088919	0.4892	0	1	1	0.4892	6.65
836	MSTRG.12135.1_13	-5036.993416	0.0925	-5036.993416	0.0925	-5036.993416	0.0925	0	1	1	0.0925	90
837	MSTRG.12137.1_1	-570.380043	0.5567	-567.308046	0.4823	-563.590082	48.1839	6.143994	0.046328544	0.208449877	0.5567	29.44
838	MSTRG.12148.11_5	-997.2371	1.00E-04	-997.236979	0	-997.23696	0	0.000242	0.999879007	1	1.00E-04	90
839	MSTRG.12148.6_3	-1362.554611	0.1118	-1357.865401	0.8514	-1357.672961	1.7772	9.37842	0.009193947	0.05542831	0.8514	90
840	MSTRG.1215.39_17	-1587.128731	0.0055	-1581.915282	0.5666	-1581.915282	0.5666	10.426898	0.005442869	0.035803448	0.5666	90
841	MSTRG.12153.17_24	-566.863809	0.8108	-566.863809	0.8108	-566.863809	0.8107	0	1	1	0.8108	29.44
842	MSTRG.12155.2_1	-152.102633	2.1	-152.102625	0.428	-152.102616	3.00E-04	1.60E-05	0.999992	1	2.1	6.65
843	MSTRG.12157.1_1	-369.848475	1.2113	-369.862112	1	-369.848475	1.2113	-0.027274	1	1	1.2113	15.76
844	MSTRG.12158.1_5	-1206.58429	1.00E-04	-1206.583476	0	-1206.583387	0	0.001628	0.999186331	1	1.00E-04	90
845	MSTRG.12159.1_1	-167.112238	0.5029	-167.112239	0.5029	-167.112238	0.5029	-2.00E-06	1	1	0.5029	29.44
846	MSTRG.12174.15_3	-3091.99621	0.479	-3090.873923	0.6262	-3090.346605	20.6089	2.244574	0.325534445	1	0.479	90
847	MSTRG.12174.18_1	-396.617433	999	-397.046536	1	-396.617584	951.433	-0.858206	1	1	999	6.65
848	MSTRG.12184.1_42	-524.338129	2.1331	-524.606796	1	-521.788063	4.6255	-0.537334	1	1	2.1331	15.76
849	MSTRG.12185.1_2	-2082.817303	1.00E-04	-2082.816783	0	-2082.816705	0	0.00104	0.999480135	1	1.00E-04	90
850	MSTRG.12199.1_2	-480.109805	0.4362	-479.87512	0.4901	-478.55772	25.7358	0.46937	0.790819919	1	0.4362	90
851	MSTRG.12200.1_4	-267.892576	1.00E-04	-267.892444	0	-267.892424	0	0.000264	0.999868009	1	1.00E-04	6.65
852	MSTRG.12208.1_2	-344.210828	0.6373	-335.840536	0.4791	-332.387193	2.3872	16.740584	0.000231648	0.002404569	0.4791	29.44
853	MSTRG.12218.1_1	-152.102635	2.1001	-152.10264	0.7901	-152.102642	0.5705	-1.00E-05	1	1	2.1001	15.76
854	MSTRG.12225.1_10	-779.557129	0.3038	-773.167161	0.1471	-752.325218	46.1871	12.779936	0.00167831	0.013312578	0.1471	90
855	MSTRG.12227.8_1	-2814.531251	0.7271	-2804.669068	0.3576	-2790.853093	10.9369	19.724366	5.21E-05	0.000645785	0.3576	90
856	MSTRG.12232.1_6	-434.813887	0.4273	-434.813887	0.4273	-434.813887	0.4273	0	1	1	0.4273	6.65
857	MSTRG.12234.5_6	-1806.73854	0.006	-1806.319202	0.2084	-1806.319202	0.2084	0.838676	0.657481929	1	0.006	90
858	MSTRG.12237.5_4	-4793.41898	0.416	-4781.56008	0.1871	-4749.309246	21.8381	23.7178	7.08E-06	0.000112371	0.1871	90
859	MSTRG.12239.1_1	-476.231236	2.3031	-476.583517	1	-476.231236	2.3031	-0.704562	1	1	2.3031	15.76
860	MSTRG.12239.14_2	-1865.89931	0.2523	-1865.89931	0.2523	-1865.89931	0.2523	0	1	1	0.2523	90
861	MSTRG.12239.8_9	-1628.621408	0.0995	-1628.62141	0.0995	-1628.621408	0.0995	-4.00E-06	1	1	0.0995	90
862	MSTRG.12241.1_12	-1069.578308	0.7348	-1063.070859	0.5812	-1055.669	6.8554	13.014898	0.001492282	0.012026369	0.5812	29.44
863	MSTRG.12247.1_1	-281.93444	0.8033	-281.824845	0.7992	-281.621181	1.3204	0.21919	0.896197022	1	0.8033	29.44
864	MSTRG.12248.1_2	-429.709554	0.3799	-421.957889	0.5045	-416.185146	63.4837	15.50333	0.000430026	0.004117757	0.5045	9.06
865	MSTRG.12249.7_3	-4262.731042	0.2762	-4262.731042	0.2762	-4262.731042	0.2762	0	1	1	0.2762	90
866	MSTRG.12263.1_4	-2370.766391	0.5614	-2370.766391	0.5614	-2370.766414	0.5615	0	1	1	0.5614	90
867	MSTRG.12263.24_3	-2370.423824	0.5662	-2370.424173	0.5661	-2370.424155	0.5661	-0.000698	1	1	0.5662	90
868	MSTRG.12264.1_8	-644.025575	0.0902	-635.723622	0.5323	-630.92615	157.65	16.603906	0.000248032	0.002547144	0.5323	29.44
869	MSTRG.12267.2_3	-803.735027	0.7388	-803.735027	0.7388	-803.735027	0.7388	0	1	1	0.7388	29.44
870	MSTRG.12270.1_11	-375.13077	0.1251	-375.130771	0.1251	-375.13077	0.1251	-2.00E-06	1	1	0.1251	9.06
871	MSTRG.12274.1_1	-326.374154	999	-326.77714	1	-326.374303	951.6266	-0.805972	1	1	999	29.44
872	MSTRG.12277.1_6	-315.135075	40.9098	-315.375881	1	-315.134984	42.7772	-0.481612	1	1	40.9098	90
873	MSTRG.1228.10_2	-3358.28406	0.0082	-3350.623511	0.625	-3350.623511	0.625	15.321098	0.000471049	0.004448677	0.625	90
874	MSTRG.1229.1_2	-702.959431	1.7055	-697.845222	0.8869	-697.845044	5.2479	10.228418	0.00601073	0.038779202	0.8869	29.44
875	MSTRG.12293.1_13	-859.899858	1.079	-854.848436	0.7	-839.167899	33.0391	10.102844	0.006400226	0.040843674	0.7	90
876	MSTRG.12297.8_28	-18042.94916	0.2559	-18042.94916	0.2559	-18042.94916	0.2559	-1.00E-05	1	1	0.2559	90
877	MSTRG.12302.1_5	-1513.101461	0.1731	-1513.10173	0.1731	-1513.10173	0.1731	-0.000538	1	1	0.1731	90
878	MSTRG.12311.1_1	-215.094324	0.4878	-214.712478	0.492	-214.680639	0.5564	0.763692	0.682600166	1	0.4878	29.44
879	MSTRG.12312.8_10	-4501.398754	0.3103	-4501.398755	0.3103	-4501.398754	0.3103	-2.00E-06	1	1	0.3103	90
880	MSTRG.12317.1_3	-1200.376526	2.0999	-1200.376354	0	-1200.376493	0.4443	0.000344	0.999828015	1	2.0999	90
881	MSTRG.12317.5_3	-1293.914968	1.0271	-1293.915508	1	-1293.915286	1.0253	-0.00108	1	1	1.0271	90
882	MSTRG.12319.1_3	-1206.87916	1.00E-04	-1206.878647	0	-1206.87859	0	0.001026	0.999487132	1	1.00E-04	90
883	MSTRG.12320.3_1	-972.963571	1.0834	-972.966011	1	-972.963957	1.0824	-0.00488	1	1	1.0834	90
884	MSTRG.12323.4_1	-334.935433	999	-335.33789	1	-334.935574	951.8623	-0.804914	1	1	999	90
885	MSTRG.12325.1_9	-2084.900413	0.4215	-2084.90042	0.4215	-2084.900413	0.4215	-1.40E-05	1	1	0.4215	29.44
886	MSTRG.12330.1_10	-589.12932	1.0509	-589.130207	1	-589.12932	1.0509	-0.001774	1	1	1.0509	29.44
887	MSTRG.1234.1_10	-197.322233	1.00E-04	-197.322233	0	-197.322162	0	0	1	1	1.00E-04	15.76
888	MSTRG.12344.4_5	-2896.826769	1.00E-04	-2896.824789	0	-2896.824571	0	0.00396	0.998021959	1	1.00E-04	90
889	MSTRG.12352.7_4	-2725.511609	1.00E-04	-2725.511609	0	-2725.511609	0	0	1	1	1.00E-04	90
890	MSTRG.12358.1_3	-640.454491	0.7163	-638.306436	0.6544	-636.110832	9.8646	4.29611	0.11671094	0.444628117	0.7163	29.44
891	MSTRG.12360.1_12	-440.083224	0.9215	-437.163148	0.6415	-434.672538	9.4338	5.840152	0.053929588	0.236599014	0.9215	29.44
892	MSTRG.12364.1_2	-1368.920997	1.6567	-1363.537073	0.8373	-1363.537073	0.8373	10.767848	0.004589776	0.031135871	0.8373	90
893	MSTRG.12369.1_1	-260.895107	1.5405	-260.956819	0.8104	-258.710988	2.9107	-0.123424	1	1	1.5405	29.44
894	MSTRG.1237.9_2	-2194.099208	0.6168	-2194.099208	0.6168	-2194.09945	0.6168	0	1	1	0.6168	90
895	MSTRG.12375.1_1	-568.10539	0.5907	-566.665929	0.6501	-566.120448	1.3275	2.878922	0.237055497	0.784069581	0.5907	29.44
896	MSTRG.12376.2_11	-704.882698	0.6397	-704.664917	0.5237	-703.268155	1.1877	0.435562	0.804301564	1	0.6397	29.44
897	MSTRG.1238.1_2	-1031.694659	0.8384	-1026.916847	0.53	-1014.43319	148.7059	9.555624	0.00841439	0.051551234	0.53	29.44
898	MSTRG.12380.1_2	-447.86988	0.5502	-445.804593	0.7408	-441.223803	133.0718	4.130574	0.126781899	0.474860947	0.5502	29.44
899	MSTRG.12383.3_3	-1955.709227	1.00E-04	-1955.709124	0	-1955.709085	0	0.000206	0.999897005	1	1.00E-04	90
900	MSTRG.12385.1_1	-515.154613	0.0102	-512.018778	0.6249	-512.018778	0.6249	6.27167	0.043463447	0.1976928	0.0102	29.44
901	MSTRG.12389.1_1	-259.57107	1.00E-04	-259.568024	0	-259.568105	0	0.006092	0.996958634	1	1.00E-04	6.65
902	MSTRG.1239.1_1	-575.34832	0.1416	-572.988106	0.5777	-572.988106	0.5777	4.720428	0.094400019	0.37362627	0.1416	29.44
903	MSTRG.12390.1_6	-339.130967	0.737	-339.130967	0.737	-339.130967	0.737	0	1	1	0.737	29.44
904	MSTRG.12392.1_2	-404.053995	0.745	-398.314923	0.2836	-384.884083	31.131	11.478144	0.003217753	0.023067287	0.2836	29.44
905	MSTRG.12393.1_12	-438.644737	999	-439.536152	1	-438.645042	951.4322	-1.78283	1	1	999	29.44
906	MSTRG.124.1_2	-1275.241624	0.4548	-1270.5136	0.4159	-1259.04253	124.5781	9.456048	0.008843929	0.053669916	0.4159	90
907	MSTRG.1240.1_1	-1714.965474	0.0204	-1712.28447	0.2704	-1712.28447	0.2704	5.362008	0.068494351	0.287801756	0.0204	90
908	MSTRG.12407.1_9	-364.876942	0.5854	-363.4485	0.2787	-357.165654	27.8939	2.856884	0.239682056	0.790902183	0.5854	15.76
909	MSTRG.12408.1_3	-336.162829	0.6613	-328.905687	0.2651	-316.059878	30.8541	14.514284	0.00070512	0.006270207	0.2651	29.44
910	MSTRG.12409.2_1	-1731.722435	0.2254	-1727.672851	0.1223	-1719.324943	20.0025	8.099168	0.017429624	0.093822823	0.1223	90
911	MSTRG.12410.1_1	-444.468319	0.2965	-444.46832	0.2965	-444.468319	0.2965	-2.00E-06	1	1	0.2965	29.44
912	MSTRG.12415.1_4	-612.497939	0.7569	-607.05071	0.6683	-605.625696	1.6244	10.894458	0.004308226	0.029619931	0.6683	29.44
913	MSTRG.12417.1_6	-543.783408	0.6772	-541.636452	0.6882	-539.924507	90.5131	4.293912	0.116839276	0.445036889	0.6772	6.65
914	MSTRG.12418.2_4	-913.935866	0.4123	-913.935866	0.4123	-913.935866	0.4123	0	1	1	0.4123	90
915	MSTRG.12419.4_2	-1655.994008	0.7427	-1650.447956	0.2454	-1630.168933	5.6443	11.092104	0.003902835	0.027132593	0.2454	90
916	MSTRG.1244.1_10	-381.013729	999	-382.810127	1	-381.013749	990.3519	-3.592796	1	1	999	29.44
917	MSTRG.12448.1_7	-514.26135	1.00E-04	-514.261255	0	-514.261238	0	0.00019	0.999905005	1	1.00E-04	6.65
918	MSTRG.12450.1_1	-927.200968	0.286	-927.200974	0.2845	-927.200968	0.286	-1.20E-05	1	1	0.286	90
919	MSTRG.12461.1_5	-359.377426	0.559	-357.419876	0.6131	-356.743324	1.1251	3.9151	0.141203947	0.518156028	0.559	29.44
920	MSTRG.12462.9_4	-2212.796933	0.0889	-2212.796933	0.0889	-2212.796933	0.0889	0	1	1	0.0889	90
921	MSTRG.12465.4_5	-6334.045081	0.0068	-6329.061512	0.4007	-6329.061537	0.4008	9.967138	0.006849573	0.043190078	0.4007	90
922	MSTRG.12474.2_3	-2036.135609	0.7637	-2030.049399	0.4053	-2001.026455	83.5441	12.17242	0.002274011	0.017311282	0.4053	29.44
923	MSTRG.12476.7_3	-721.765217	6.2004	-718.734671	0.8571	-718.734671	0.8571	6.061092	0.048289265	0.215231477	6.2004	90
924	MSTRG.1248.1_2	-403.922852	1.00E-04	-403.922738	0	-403.922719	0	0.000228	0.999886006	1	1.00E-04	9.06
925	MSTRG.12483.1_2	-308.803173	1.00E-04	-308.803286	0	-308.803029	0	-0.000226	1	1	1.00E-04	6.65
926	MSTRG.12485.1_1	-319.098854	0.5314	-319.098854	0.5314	-319.098854	0.5314	0	1	1	0.5314	6.65
927	MSTRG.12486.1_1	-202.492168	999	-203.37002	1	-202.492168	999	-1.755704	1	1	999	6.65
928	MSTRG.12500.1_3	-271.853045	0.348	-271.853049	0.3477	-271.853045	0.348	-8.00E-06	1	1	0.348	90
929	MSTRG.12511.1_8	-378.413309	0.866	-378.413309	0.866	-378.413309	0.866	0	1	1	0.866	90
930	MSTRG.12523.2_1	-956.894107	0.637	-951.879541	0.3147	-938.507673	15.9378	10.029132	0.006640513	0.042034728	0.3147	15.76
931	MSTRG.12527.1_6	-610.041711	0.1677	-610.041712	0.1677	-610.041711	0.1677	-2.00E-06	1	1	0.1677	29.44
932	MSTRG.12529.1_8	-870.189244	0.942	-868.485964	0.7012	-867.060405	1.5177	3.40656	0.182085304	0.636954309	0.942	90
933	MSTRG.12532.2_3	-591.59196	0.3873	-591.59196	0.3873	-591.59196	0.3873	0	1	1	0.3873	90
934	MSTRG.12534.2_2	-1250.246506	0.7019	-1229.965519	0.21	-1177.653834	63.1123	40.561974	1.56E-09	6.01E-08	0.21	90
935	MSTRG.12536.1_4	-593.579488	0.9198	-592.960043	0.6615	-588.89948	17.1321	1.23889	0.53824308	1	0.9198	15.76
936	MSTRG.12538.1_3	-778.145069	0.8139	-771.096513	0.6313	-766.65838	2.1309	14.097112	0.000868662	0.007534462	0.6313	29.44
937	MSTRG.12541.1_2	-482.620912	0.3337	-482.620913	0.3337	-482.620912	0.3337	-2.00E-06	1	1	0.3337	9.06
938	MSTRG.12542.1_5	-492.021829	0.4762	-492.021829	0.4762	-492.021829	0.4762	0	1	1	0.4762	6.65
939	MSTRG.12543.1_1	-444.122897	1.2883	-444.169203	1	-444.122897	1.2883	-0.092612	1	1	1.2883	9.06
940	MSTRG.12545.2_1	-574.395785	0.4569	-573.640492	0.758	-572.773182	38.7366	1.510586	0.469872922	1	0.4569	29.44
941	MSTRG.12548.3_12	-697.017785	0.9036	-691.151631	0.3882	-665.236244	131.3782	11.732308	0.002833751	0.020728908	0.3882	90
942	MSTRG.12549.1_2	-1254.348073	1.00E-04	-1254.346391	0	-1254.346221	0	0.003364	0.998319414	1	1.00E-04	90
943	MSTRG.12549.6_3	-1256.668741	1.00E-04	-1256.667685	0	-1256.667545	0	0.002112	0.998944557	1	1.00E-04	90
944	MSTRG.12551.14_5	-1545.622635	1.00E-04	-1545.62192	0	-1545.621841	0	0.00143	0.999285256	1	1.00E-04	90
945	MSTRG.12554.1_1	-166.128745	0.4447	-166.128921	0.4446	-166.128745	0.4447	-0.000352	1	1	0.4447	6.65
946	MSTRG.12555.1_1	-723.71053	0.0082	-713.335134	0.757	-713.335134	0.757	20.750792	3.12E-05	0.000414991	0.757	29.44
947	MSTRG.12556.2_2	-1792.798779	0.2757	-1786.966797	0.1892	-1768.571795	41.9571	11.663964	0.002932259	0.021331482	0.1892	90
948	MSTRG.12556.4_6	-5605.594805	0.2309	-5605.594806	0.2309	-5605.594805	0.2309	-2.00E-06	1	1	0.2309	90
949	MSTRG.12558.10_16	-3944.043245	1.7567	-3944.438423	1	-3944.043245	1.7567	-0.790356	1	1	1.7567	90
950	MSTRG.12558.3_8	-4253.014694	0.3755	-4253.014694	0.3755	-4253.014694	0.3755	0	1	1	0.3755	90
951	MSTRG.1256.3_3	-2815.073117	0.715	-2806.748682	0.1901	-2769.444128	28.0614	16.64887	0.000242518	0.002497793	0.1901	90
952	MSTRG.12561.1_9	-1128.908712	0.6125	-1128.379041	0.6909	-1128.379041	0.6909	1.059342	0.588798653	1	0.6125	90
953	MSTRG.12562.1_3	-1349.930294	0.6875	-1342.989889	0.4254	-1317.684343	97.2737	13.88081	0.000967878	0.008256229	0.4254	90
954	MSTRG.12563.1_20	-3428.014259	1.2594	-3428.0345	1	-3428.014259	1.2594	-0.040482	1	1	1.2594	90
955	MSTRG.12564.4_5	-645.407197	1.3126	-633.508415	0.1979	-633.508421	0.5223	23.797564	6.80E-06	0.00010863	0.1979	90
956	MSTRG.12568.10_4	-2302.454344	0.0062	-2297.399395	0.5211	-2297.399395	0.5211	10.109898	0.006377692	0.040712153	0.5211	90
957	MSTRG.12568.8_10	-3456.967745	0.2423	-3453.382413	0.1728	-3443.085482	3.2468	7.170664	0.027727461	0.137177092	0.2423	90
958	MSTRG.12569.3_15	-10124.85326	0.3778	-10124.85437	0.3774	-10124.85327	0.3778	-0.002222	1	1	0.3778	90
959	MSTRG.12569.4_5	-8541.034377	1.00E-04	-8541.020092	0	-8541.02012	0	0.02857	0.985816547	1	1.00E-04	90
960	MSTRG.12569.7_8	-11158.94355	0.2757	-11158.94355	0.2757	-11158.94355	0.2756	-2.00E-06	1	1	0.2757	90
961	MSTRG.12575.3_1	-1265.647863	0.9187	-1249.830962	0.4023	-1201.896985	121.9658	31.633802	1.35E-07	3.31E-06	0.4023	90
962	MSTRG.12576.3_6	-702.264937	1.5785	-702.517706	1	-699.282061	24.2248	-0.505538	1	1	1.5785	6.65
963	MSTRG.12577.21_7	-3052.388374	0.6859	-3051.90743	0.5196	-3050.537489	0.7449	0.961888	0.618199536	1	0.6859	90
964	MSTRG.12579.1_1	-583.116111	0.8645	-576.490634	0.6153	-565.395549	69.0639	13.250954	0.001326148	0.010886556	0.6153	29.44
965	MSTRG.12580.1_3	-471.66723	83.748	-472.59088	1	-471.634778	999	-1.8473	1	1	83.748	29.44
966	MSTRG.12584.1_6	-2569.214804	0.9069	-2569.214804	0.9069	-2569.214804	0.9069	0	1	1	0.9069	90
967	MSTRG.12585.1_2	-152.102638	2.0999	-152.102543	0	-152.102609	0.4134	0.00019	0.999905005	1	2.0999	6.65
968	MSTRG.12586.4_2	-2389.209916	0.4011	-2389.209916	0.4011	-2389.209916	0.4011	0	1	1	0.4011	90
969	MSTRG.12587.1_5	-1763.143215	0.1692	-1763.143492	0.1692	-1763.14349	0.1692	-0.000554	1	1	0.1692	90
970	MSTRG.12587.7_6	-1482.642614	0.4549	-1482.642614	0.4549	-1482.642614	0.4549	0	1	1	0.4549	90
971	MSTRG.12588.11_11	-862.197051	0.0078	-861.468856	0.7268	-861.468856	0.7268	1.45639	0.482779621	1	0.0078	29.44
972	MSTRG.12589.1_7	-728.82384	999	-729.451863	1	-728.823878	951.4649	-1.256046	1	1	999	29.44
973	MSTRG.12593.9_2	-3743.032819	0.4832	-3687.745502	0.3111	-3610.510862	127.6063	110.574634	9.75E-25	5.57E-22	0.3111	90
974	MSTRG.12594.1_7	-2877.086301	0.3269	-2870.644494	0.154	-2854.988914	1.2014	12.883614	0.001593525	0.012706752	0.154	90
975	MSTRG.12597.1_8	-1090.128599	0.4345	-1090.128637	0.436	-1090.128599	0.4345	-7.60E-05	1	1	0.4345	15.76
976	MSTRG.12598.1_2	-508.571971	0.3803	-496.111728	0.5725	-492.002345	71.5667	24.920486	3.88E-06	6.56E-05	0.5725	29.44
977	MSTRG.12599.4_4	-934.59968	0.5705	-934.365425	0.8665	-934.365425	0.8665	0.46851	0.791160044	1	0.5705	90
978	MSTRG.126.1_2	-686.50922	0.8414	-685.677275	0.8354	-683.832162	3.2958	1.66389	0.435201995	1	0.8414	29.44
979	MSTRG.12600.1_7	-636.008079	999	-636.844668	1	-636.008079	998.9997	-1.673178	1	1	999	29.44
980	MSTRG.12601.24_10	-3427.233497	0.1864	-3427.233497	0.1864	-3427.23357	0.1861	0	1	1	0.1864	90
981	MSTRG.12613.1_1	-392.965853	0.7919	-390.686918	0.6895	-388.087821	156.2748	4.55787	0.102393197	0.399286284	0.7919	29.44
982	MSTRG.12614.1_2	-364.505532	0.4758	-360.338532	0.1832	-351.942052	6.7406	8.334	0.015498687	0.085273007	0.1832	9.06
983	MSTRG.12616.7_4	-893.574526	1.00E-04	-893.573867	0	-893.573794	0	0.001318	0.999341217	1	1.00E-04	90
984	MSTRG.12623.10_4	-1666.018509	0.0618	-1666.01851	0.0618	-1666.018509	0.0618	-2.00E-06	1	1	0.0618	90
985	MSTRG.12625.30_12	-759.35533	0.41	-759.35533	0.41	-759.35533	0.41	0	1	1	0.41	29.44
986	MSTRG.12626.1_1	-301.166376	1.00E-04	-301.166243	0	-301.166221	0	0.000266	0.999867009	1	1.00E-04	29.44
987	MSTRG.12629.1_2	-410.865167	0.3528	-406.466985	0.3102	-399.83874	215.6024	8.796364	0.01229968	0.070360854	0.3102	90
988	MSTRG.12633.1_6	-663.720366	0.8305	-653.038071	0.3307	-640.450585	37.6383	21.36459	2.29E-05	0.000316259	0.3307	15.76
989	MSTRG.12641.1_4	-255.883839	1.00E-04	-255.88373	0	-255.883646	0	0.000218	0.999891006	1	1.00E-04	29.44
990	MSTRG.12643.3_7	-1847.39687	1.00E-04	-1847.396514	0	-1847.396424	0	0.000712	0.999644063	1	1.00E-04	90
991	MSTRG.12645.1_3	-1186.419078	0.2051	-1186.419078	0.2051	-1186.419079	0.2051	0	1	1	0.2051	90
992	MSTRG.12645.2_2	-1379.897776	0.1981	-1379.897776	0.1981	-1379.89778	0.1983	0	1	1	0.1981	90
993	MSTRG.12646.18_2	-2094.513677	0.8444	-2083.47223	0.275	-2035.229567	62.9154	22.082894	1.60E-05	0.00023107	0.275	90
994	MSTRG.12646.21_2	-1005.585091	0.5225	-1003.340349	0.2894	-998.016221	1.2783	4.489484	0.105954873	0.410677051	0.5225	90
995	MSTRG.12646.8_4	-1244.06573	0.0997	-1243.770765	0.8008	-1243.770765	0.8008	0.58993	0.744557647	1	0.0997	90
996	MSTRG.12655.1_7	-252.056115	999	-252.470719	1	-252.056269	951.4421	-0.829208	1	1	999	29.44
997	MSTRG.12656.1_1	-207.52409	389.3654	-207.718607	1	-207.52404	427.9279	-0.389034	1	1	389.3654	15.76
998	MSTRG.12658.1_3	-606.021217	0.5298	-606.021587	0.5298	-606.021968	0.5354	-0.00074	1	1	0.5298	90
999	MSTRG.12664.1_1	-330.364841	999	-331.628405	1	-330.364841	999	-2.527128	1	1	999	90
1000	MSTRG.12665.1_4	-251.897742	288.8056	-252.274608	1	-251.897605	339.3777	-0.753732	1	1	288.8056	15.76
1001	MSTRG.12667.1_3	-805.599581	1.4284	-805.648448	1	-805.599581	1.4284	-0.097734	1	1	1.4284	29.44
1002	MSTRG.12669.1_5	-1991.661604	0.6021	-1985.743973	0.2128	-1956.632293	23.6778	11.835262	0.002691569	0.019916104	0.2128	90
1003	MSTRG.12669.2_7	-789.289335	2.0999	-789.289262	0.308	-789.289187	0	0.000146	0.999927003	1	2.0999	90
1004	MSTRG.12670.1_1	-198.13356	1.00E-04	-198.133169	0	-198.133128	0	0.000782	0.999609076	1	1.00E-04	6.65
1005	MSTRG.12671.1_1	-417.84586	0.7502	-415.783971	0.5801	-412.221335	8.648	4.123778	0.127213437	0.476234339	0.7502	29.44
1006	MSTRG.12673.4_5	-2823.349791	0.2379	-2823.349792	0.2379	-2823.349792	0.2379	-2.00E-06	1	1	0.2379	90
1007	MSTRG.12678.1_8	-312.329011	2.6675	-312.819914	1	-307.612655	69.7284	-0.981806	1	1	2.6675	29.44
1008	MSTRG.12680.1_2	-1156.440272	0.5954	-1149.974097	0.6368	-1149.134815	1.0767	12.93235	0.001555163	0.012447775	0.6368	90
1009	MSTRG.12687.3_2	-1256.732738	0.0762	-1256.730855	0.0783	-1256.471484	1.2492	0.003766	0.998118772	1	0.0762	90
1010	MSTRG.1269.1_6	-2424.745831	0.4082	-2424.745845	0.4083	-2424.745831	0.4082	-2.80E-05	1	1	0.4082	90
1011	MSTRG.12694.1_2	-2290.961631	0.4456	-2277.296204	0.7206	-2275.872581	39.6514	27.330854	1.16E-06	2.22E-05	0.7206	90
1012	MSTRG.12696.3_61	-966.189081	0.6273	-959.857812	0.3033	-936.410088	82.8051	12.662538	0.001779774	0.014001902	0.3033	29.44
1013	MSTRG.12707.6_6	-3168.088325	0.6688	-3129.189468	0.4004	-3069.433796	58.988	77.797714	1.28E-17	2.09E-15	0.4004	90
1014	MSTRG.12710.4_2	-855.954363	0.5431	-844.153751	0.3363	-822.076592	127.0174	23.601224	7.50E-06	0.000117789	0.3363	15.76
1015	MSTRG.12711.3_2	-235.916876	999	-236.319945	1	-235.916977	954.4571	-0.806138	1	1	999	29.44
1016	MSTRG.12712.5_4	-1819.082745	0.8067	-1808.331076	0.3894	-1765.976967	70.2869	21.503338	2.14E-05	0.000298367	0.3894	90
1017	MSTRG.12714.4_5	-810.784342	1.00E-04	-810.784231	0	-810.784213	0	0.000222	0.999889006	1	1.00E-04	9.06
1018	MSTRG.12717.1_1	-147.991683	1.00E-04	-147.991683	0	-147.991683	0	0	1	1	1.00E-04	6.65
1019	MSTRG.12718.1_9	-1265.635664	1.1139	-1265.639872	1	-1265.635936	1.1138	-0.008416	1	1	1.1139	90
1020	MSTRG.12721.3_4	-1125.889271	1.00E-04	-1125.889047	0	-1125.88901	0	0.000448	0.999776025	1	1.00E-04	90
1021	MSTRG.12723.9_5	-1785.447219	0.3004	-1785.447221	0.3004	-1785.447219	0.3004	-4.00E-06	1	1	0.3004	90
1022	MSTRG.12724.2_5	-1714.624238	2.631	-1716.056954	1	-1713.806803	2.8453	-2.865432	1	1	2.631	29.44
1023	MSTRG.12727.1_5	-300.555257	999	-301.139382	1	-300.555285	957.5855	-1.16825	1	1	999	6.65
1024	MSTRG.12728.1_2	-354.703433	0.6448	-352.039923	0.5775	-347.760151	4.7603	5.32702	0.069703134	0.29193621	0.6448	29.44
1025	MSTRG.12729.1_1	-423.955591	0.577	-414.354263	0.4513	-407.365492	11.6606	19.202656	6.76E-05	0.000813011	0.4513	29.44
1026	MSTRG.12731.1_3	-325.283459	1.3218	-325.312738	1	-325.283459	1.3218	-0.058558	1	1	1.3218	29.44
1027	MSTRG.12733.1_2	-210.405015	1.00E-04	-210.404575	0	-210.404528	0	0.00088	0.999560097	1	1.00E-04	9.06
1028	MSTRG.12737.1_46	-1023.143056	0.4746	-1023.143056	0.4746	-1023.143056	0.4746	0	1	1	0.4746	29.44
1029	MSTRG.1274.2_1	-1503.343363	0.2746	-1503.343364	0.2746	-1503.343363	0.2746	-2.00E-06	1	1	0.2746	90
1030	MSTRG.12746.1_6	-1321.083767	0.0093	-1320.665848	0.7194	-1320.650764	0.9543	0.835838	0.658415558	1	0.0093	29.44
1031	MSTRG.12758.1_5	-472.72572	0.4869	-466.646743	0.2014	-458.007624	12.353	12.157954	0.002290519	0.01742392	0.2014	29.44
1032	MSTRG.1276.1_3	-649.518895	2.0999	-649.518827	0.2495	-649.518674	0	0.000136	0.999932002	1	2.0999	90
1033	MSTRG.1276.1_3	-649.518895	2.0999	-649.518827	0.2495	-649.518674	0	0.000136	0.999932002	1	2.0999	90
1034	MSTRG.12762.2_2	-372.203259	0.7921	-372.203259	0.7921	-372.203259	0.7922	0	1	1	0.7921	29.44
1035	MSTRG.12766.7_2	-1605.425695	0.5026	-1605.149908	0.441	-1603.91756	0.9065	0.551574	0.758974575	1	0.5026	90
1036	MSTRG.12771.1_1	-588.183426	2.0733	-588.015088	0.6552	-570.558758	174.4869	0.336676	0.845068153	1	2.0733	6.65
1037	MSTRG.12776.14_7	-1022.924996	1.3234	-1022.954752	1	-1022.924996	1.3234	-0.059512	1	1	1.3234	6.65
1038	MSTRG.12786.1_6	-532.350868	1.0163	-531.361327	0.5089	-521.957622	54.0043	1.979082	0.371747284	1	1.0163	90
1039	MSTRG.1279.1_2	-396.07538	999	-397.982323	1	-394.090276	79.7336	-3.813886	1	1	999	29.44
1040	MSTRG.12791.1_2	-2510.215517	0.373	-2505.73697	0.6232	-2505.73697	0.6232	8.957094	0.011349893	0.065909135	0.6232	90
1041	MSTRG.12791.4_2	-1660.683113	0.4593	-1658.648564	0.9069	-1657.588391	0.7099	4.069098	0.130739433	0.487211053	0.4593	90
1042	MSTRG.12792.1_1	-1061.452068	0.0086	-1057.665334	0.6692	-1057.665334	0.6692	7.573468	0.02266952	0.116571145	0.0086	90
1043	MSTRG.12795.1_6	-392.014371	1.00E-04	-392.014228	0	-392.014194	0	0.000286	0.99985701	1	1.00E-04	29.44
1044	MSTRG.128.5_65	-1556.726885	0.2871	-1556.726885	0.2871	-1556.728142	0.2891	0	1	1	0.2871	90
1045	MSTRG.12804.1_2	-491.782102	0.4649	-486.974597	0.6134	-483.516274	31.8678	9.61501	0.008168214	0.050130133	0.6134	29.44
1046	MSTRG.12808.12_5	-634.990628	0.655	-625.719728	0.4067	-607.019103	276.3594	18.5418	9.41E-05	0.001089868	0.4067	90
1047	MSTRG.12808.8_3	-2936.928103	0.0776	-2936.928107	0.0776	-2936.928103	0.0776	-8.00E-06	1	1	0.0776	90
1048	MSTRG.12810.1_3	-418.349828	1.5186	-417.079419	0.8621	-416.674515	1.721	2.540818	0.280716785	0.90019154	1.5186	29.44
1049	MSTRG.12832.3_7	-553.00603	630.1973	-554.853104	1	-553.004723	999	-3.694148	1	1	630.1973	29.44
1050	MSTRG.12838.1_1	-1748.473854	0.8089	-1720.562537	0.3034	-1642.883174	171.9405	55.822634	7.56E-13	5.57E-11	0.3034	90
1051	MSTRG.12848.1_2	-285.459743	999	-285.718443	1	-285.459757	952.0644	-0.5174	1	1	999	9.06
1052	MSTRG.1285.10_4	-3769.515067	0.5775	-3766.887175	0.307	-3752.577244	5.4888	5.255784	0.072230564	0.300380888	0.5775	90
1053	MSTRG.12857.1_3	-487.450837	1.9895	-487.660472	1	-487.450837	1.9895	-0.41927	1	1	1.9895	90
1054	MSTRG.12864.3_4	-251.688223	1.00E-04	-251.688107	0	-251.688087	0	0.000232	0.999884007	1	1.00E-04	6.65
1055	MSTRG.12867.1_2	-593.663621	0.0861	-592.74611	0.9011	-592.74611	0.9011	1.835022	0.39951219	1	0.0861	9.06
1056	MSTRG.12868.1_1	-301.935692	999	-303.305816	1	-301.935775	951.4406	-2.740248	1	1	999	9.06
1057	MSTRG.12875.1_2	-638.301148	0.5626	-634.140293	0.6125	-627.643043	63.3633	8.32171	0.015594219	0.085712201	0.6125	29.44
1058	MSTRG.12876.1_5	-414.055308	999	-415.374772	1	-414.055308	999	-2.638928	1	1	999	6.65
1059	MSTRG.12885.1_1	-249.569406	0.3335	-249.547571	0.3762	-249.547571	0.3762	0.04367	0.978401658	1	0.3335	29.44
1060	MSTRG.12892.1_1	-156.645205	1.00E-04	-156.645102	0	-156.645082	0	0.000206	0.999897005	1	1.00E-04	9.06
1061	MSTRG.12894.1_9	-310.520698	999	-311.783713	1	-310.520698	999	-2.52603	1	1	999	29.44
1062	MSTRG.129.1_5	-718.229714	0.5409	-713.33028	0.464	-710.141526	103.1724	9.798868	0.007450799	0.046413914	0.464	29.44
1063	MSTRG.12902.1_1	-985.664644	0.0052	-985.048593	0.342	-985.048593	0.3421	1.232102	0.54007298	1	0.0052	90
1064	MSTRG.1291.35_2	-2365.568585	1.00E-04	-2365.567826	0	-2365.567742	0	0.001518	0.999241288	1	1.00E-04	90
1065	MSTRG.12910.1_5	-795.449466	81.6946	-795.8563	1	-795.438299	999	-0.813668	1	1	81.6946	6.65
1066	MSTRG.12919.1_3	-473.166015	0.4552	-470.580406	0.5203	-465.786113	97.1131	5.171218	0.075350177	0.310848869	0.4552	29.44
1067	MSTRG.12921.1_1	-629.81408	1.00E-04	-629.813747	0	-629.813711	0	0.000666	0.999667055	1	1.00E-04	6.65
1068	MSTRG.12936.1_9	-5254.054154	0.1786	-5254.054155	0.1786	-5254.054156	0.1786	-2.00E-06	1	1	0.1786	90
1069	MSTRG.12936.9_9	-5080.908156	0.1277	-5080.908158	0.1276	-5080.908156	0.1276	-4.00E-06	1	1	0.1277	90
1070	MSTRG.12940.1_7	-556.952818	0.3602	-556.952818	0.3602	-556.952818	0.3602	0	1	1	0.3602	90
1071	MSTRG.12941.1_3	-3457.925445	0.0034	-3454.357667	0.5228	-3454.357667	0.5228	7.135556	0.028218486	0.138699364	0.0034	90
1072	MSTRG.12941.3_3	-3457.925445	0.0034	-3454.357667	0.5228	-3454.357667	0.5228	7.135556	0.028218486	0.138699364	0.0034	90
1073	MSTRG.1295.1_1	-534.414629	0.9238	-534.414465	0.1361	-534.414334	0	0.000328	0.999836013	1	0.9238	90
1074	MSTRG.12959.2_1	-1093.94451	2.4741	-1091.975578	0.3266	-1076.485713	10.4979	3.937864	0.139605876	0.513092825	2.4741	90
1075	MSTRG.1296.8_2	-3106.494138	0.4873	-3100.036675	0.7766	-3097.973716	5.506	12.914926	0.001568771	0.012531661	0.7766	90
1076	MSTRG.12960.5_2	-1827.950619	0.508	-1811.443157	0.2364	-1776.182634	119.8179	33.014924	6.77E-08	1.77E-06	0.2364	90
1077	MSTRG.12963.1_2	-721.924927	0.5226	-714.659182	0.6459	-714.17701	1.6629	14.53149	0.00069908	0.006229588	0.6459	29.44
1078	MSTRG.12964.1_4	-549.800819	0.5824	-549.800819	0.5824	-549.800819	0.5824	0	1	1	0.5824	6.65
1079	MSTRG.12979.1_2	-143.880868	2.1	-143.880832	0.0541	-143.880802	0	7.20E-05	0.999964001	1	2.1	9.06
1080	MSTRG.12985.2_2	-1014.195513	0.333	-1000.284771	0.3243	-990.967576	97.0863	27.821484	9.09E-07	1.79E-05	0.3243	90
1081	MSTRG.12991.8_2	-1201.108955	0.3965	-1199.756691	0.6147	-1199.515553	17.3283	2.704528	0.258654005	0.840526185	0.3965	90
1082	MSTRG.130.1_11	-1148.297572	999	-1148.681093	1	-1148.109272	31.8018	-0.767042	1	1	999	29.44
1083	MSTRG.13000.1_2	-235.151843	1.00E-04	-235.151719	0	-235.151699	0	0.000248	0.999876008	1	1.00E-04	90
1084	MSTRG.13001.24_9	-4553.061433	0.9772	-4553.061433	0.9772	-4553.061433	0.9772	0	1	1	0.9772	90
1085	MSTRG.13005.1_5	-563.878047	1.1177	-563.699099	0.6348	-561.956278	1.5597	0.357896	0.836149378	1	1.1177	90
1086	MSTRG.1301.2_2	-600.188467	2.4906	-600.188466	0.2038	-600.188467	0.6401	2.00E-06	0.999999	1	2.4906	90
1087	MSTRG.13011.1_2	-556.956865	0.3586	-555.032478	0.4632	-552.833758	40.4946	3.848774	0.145965206	0.53287458	0.3586	29.44
1088	MSTRG.13014.7_5	-1809.073251	0.3666	-1809.073251	0.3665	-1809.073254	0.3662	0	1	1	0.3666	90
1089	MSTRG.13020.2_3	-681.86183	999	-683.375456	1	-681.861923	951.5478	-3.027252	1	1	999	90
1090	MSTRG.13021.1_1	-544.899014	1.00E-04	-544.898819	0	-544.898784	0	0.00039	0.999805019	1	1.00E-04	90
1091	MSTRG.1303.17_2	-1623.858592	0.009	-1621.275563	0.61	-1621.275563	0.61	5.166058	0.075544832	0.311469678	0.009	90
1092	MSTRG.13032.15_2	-2122.160047	0.3615	-2119.081675	0.1989	-2110.334777	6.8399	6.156744	0.046034139	0.207363347	0.3615	90
1093	MSTRG.13033.1_1	-337.631758	999	-338.347048	1	-337.631795	957.8196	-1.43058	1	1	999	6.65
1094	MSTRG.13036.1_1	-188.457391	999	-189.097926	1	-188.45743	951.4213	-1.28107	1	1	999	29.44
1095	MSTRG.13038.1_2	-236.787021	999	-236.97261	1	-236.787031	951.43	-0.371178	1	1	999	29.44
1096	MSTRG.13039.1_2	-326.671695	999	-327.07296	1	-326.671827	952.4875	-0.80253	1	1	999	29.44
1097	MSTRG.13047.1_3	-476.152897	0.0066	-469.632858	0.5567	-469.632858	0.5567	13.040078	0.001473612	0.011903113	0.5567	29.44
1098	MSTRG.13052.2_2	-875.454592	0.4018	-874.266327	0.7033	-874.088114	8.0533	2.37653	0.304749546	0.961988575	0.4018	29.44
1099	MSTRG.13061.1_5	-386.465235	1.5563	-386.542616	1	-386.465235	1.5563	-0.154762	1	1	1.5563	90
1100	MSTRG.13071.1_7	-1313.231003	0.3296	-1311.265788	0.5869	-1310.227904	45.3693	3.93043	0.140125756	0.514556566	0.3296	90
1101	MSTRG.13071.4_7	-1313.231003	0.3296	-1311.265788	0.5869	-1310.227904	45.3704	3.93043	0.140125756	0.514556566	0.3296	90
1102	MSTRG.13074.2_5	-587.949813	1.1675	-580.656876	0.4396	-558.819367	71.3288	14.585874	0.000680327	0.006077837	0.4396	15.76
1103	MSTRG.13075.1_5	-758.717637	0.3535	-757.794582	0.3977	-757.791979	0.4063	1.84611	0.397303423	1	0.3535	15.76
1104	MSTRG.13078.1_2	-502.263629	1.833	-501.687086	0.6434	-493.580375	8.5779	1.153086	0.561837285	1	1.833	29.44
1105	MSTRG.13081.1_5	-391.650206	1.00E-04	-391.6501	0	-391.650082	0	0.000212	0.999894006	1	1.00E-04	29.44
1106	MSTRG.13091.1_1	-353.535152	1.8643	-346.07078	0.6581	-346.07078	0.6581	14.928744	0.000573145	0.005271687	0.6581	15.76
1107	MSTRG.13092.1_10	-235.481548	999	-235.888406	1	-235.481694	951.4347	-0.813716	1	1	999	15.76
1108	MSTRG.13093.1_1	-842.823377	0.2431	-840.801899	0.7226	-840.279682	41.5788	4.042956	0.132459545	0.49230177	0.2431	29.44
1109	MSTRG.13093.4_1	-842.823377	0.2431	-840.801899	0.7226	-840.279682	41.5788	4.042956	0.132459545	0.49230177	0.2431	29.44
1110	MSTRG.13097.1_8	-360.995329	0.5459	-360.995507	0.5459	-360.995505	0.5459	-0.000356	1	1	0.5459	29.44
1111	MSTRG.13099.1_1	-650.473555	0.8454	-647.557107	0.6929	-646.174226	1.264	5.832896	0.0541256	0.237149835	0.8454	9.06
1112	MSTRG.13100.1_5	-531.387867	999	-532.074888	1	-531.387909	951.4395	-1.374042	1	1	999	29.44
1113	MSTRG.13102.1_3	-365.96175	0.7747	-365.283717	0.579	-364.172431	1.0617	1.356066	0.507614489	1	0.7747	90
1114	MSTRG.13110.1_2	-1278.481772	1.887	-1264.527286	0.619	-1264.527286	0.619	27.908972	8.70E-07	1.73E-05	0.619	90
1115	MSTRG.13111.1_5	-217.876737	2.1	-217.876731	0.6932	-217.876731	0.6982	1.20E-05	0.999994	1	2.1	15.76
1116	MSTRG.13116.1_1	-439.503934	0.509	-439.503934	0.5091	-439.504092	0.509	0	1	1	0.509	29.44
1117	MSTRG.13122.24_4	-1591.25311	0.0082	-1590.237594	0.5	-1590.237594	0.5	2.031032	0.362215478	1	0.0082	90
1118	MSTRG.13122.26_6	-1088.385446	0.0089	-1086.739268	0.636	-1091.063126	1	3.292356	0.192785328	0.666509824	0.0089	90
1119	MSTRG.13122.38_5	-2573.63792	0.6188	-2573.131213	0.5752	-2572.569645	0.7078	1.013414	0.60247627	1	0.6188	90
1120	MSTRG.13122.43_2	-791.033746	0.5221	-786.466373	0.309	-775.312658	79.0491	9.134746	0.010385206	0.061299952	0.309	90
1121	MSTRG.13132.1_3	-234.71666	0.9234	-234.71666	0.9234	-234.71666	0.9234	0	1	1	0.9234	6.65
1122	MSTRG.1314.37_2	-1317.905219	1.0569	-1306.509283	0.4128	-1261.729376	168.4021	22.791872	1.12E-05	0.000169739	0.4128	90
1123	MSTRG.1314.5_2	-1004.512771	1.1185	-1000.560128	0.3205	-974.889771	48.9259	7.905286	0.019203879	0.101513757	1.1185	90
1124	MSTRG.13140.6_4	-680.543002	0.7871	-680.543003	0.7871	-680.543002	0.7871	-2.00E-06	1	1	0.7871	29.44
1125	MSTRG.13147.1_1	-559.532554	999	-560.584123	1	-559.532618	951.4539	-2.103138	1	1	999	29.44
1126	MSTRG.13148.1_4	-217.528855	999	-218.172784	1	-217.528894	951.4317	-1.287858	1	1	999	15.76
1127	MSTRG.13159.1_7	-401.618712	6.2242	-401.211252	0.4712	-394.853046	12.1548	0.81492	0.665338064	1	6.2242	15.76
1128	MSTRG.13165.3_5	-1631.546213	0.2642	-1625.733998	0.7112	-1624.993839	2.6701	11.62443	0.002990798	0.02172745	0.7112	90
1129	MSTRG.13167.3_1	-1103.380635	0.6201	-1098.264415	0.3797	-1089.586877	175.5172	10.23244	0.005998655	0.038713102	0.3797	90
1130	MSTRG.13183.8_1	-458.228179	1.00E-04	-458.227445	0	-458.227369	0	0.001468	0.999266269	1	1.00E-04	90
1131	MSTRG.13183.8_1	-458.228179	1.00E-04	-458.227445	0	-458.227369	0	0.001468	0.999266269	1	1.00E-04	90
1132	MSTRG.13186.8_3	-2004.007069	1.00E-04	-2004.006966	0	-2004.006946	0	0.000206	0.999897005	1	1.00E-04	90
1133	MSTRG.13186.8_3	-2004.007069	1.00E-04	-2004.006966	0	-2004.006946	0	0.000206	0.999897005	1	1.00E-04	90
1134	MSTRG.13186.8_3	-2004.007069	1.00E-04	-2004.006966	0	-2004.006946	0	0.000206	0.999897005	1	1.00E-04	90
1135	MSTRG.13188.5_1	-647.002586	1.00E-04	-647.00249	0	-647.002419	0	0.000192	0.999904005	1	1.00E-04	90
1136	MSTRG.13191.14_4	-2091.61922	0.622	-2091.61922	0.622	-2091.61922	0.622	0	1	1	0.622	90
1137	MSTRG.13193.4_3	-640.897932	292.7202	-641.736923	1	-640.895396	998.9989	-1.677982	1	1	292.7202	90
1138	MSTRG.13195.1_3	-533.104826	0.6534	-531.008944	0.3006	-521.822931	45.5381	4.191764	0.122961744	0.463764608	0.6534	9.06
1139	MSTRG.13199.1_11	-910.007046	0.6381	-906.033984	0.6359	-903.373038	14.4329	7.946124	0.018815731	0.099811131	0.6359	29.44
1140	MSTRG.132.1_2	-167.629752	0.1475	-167.630053	0.1475	-167.63005	0.1475	-0.000602	1	1	0.1475	15.76
1141	MSTRG.1320.2_10	-606.362381	0.5159	-606.362381	0.5159	-606.362381	0.5159	0	1	1	0.5159	29.44
1142	MSTRG.13200.1_15	-479.305026	0.2175	-479.305027	0.2175	-479.305026	0.2175	-2.00E-06	1	1	0.2175	6.65
1143	MSTRG.13201.1_5	-275.429065	68.177	-275.429085	0.7907	-275.429065	73.0795	-4.00E-05	1	1	68.177	29.44
1144	MSTRG.13202.8_12	-408.255049	1.00E-04	-408.254934	0	-408.254916	0	0.00023	0.999885007	1	1.00E-04	29.44
1145	MSTRG.13203.4_3	-2349.86588	0.0061	-2345.978114	0.5934	-2345.978114	0.5935	7.775532	0.020491072	0.107113573	0.0061	90
1146	MSTRG.13206.1_2	-525.344516	999	-525.52338	1	-525.344527	951.2276	-0.357728	1	1	999	90
1147	MSTRG.13206.3_2	-717.756169	0.6257	-707.049923	0.4368	-682.403319	332.6611	21.412492	2.24E-05	0.000309986	0.4368	90
1148	MSTRG.13208.1_1	-578.576687	0.4754	-577.770082	0.4971	-577.553073	0.7412	1.61321	0.446370926	1	0.4754	29.44
1149	MSTRG.13210.15_10	-3815.725211	0.1101	-3815.725213	0.1101	-3815.725368	0.1103	-4.00E-06	1	1	0.1101	90
1150	MSTRG.13211.1_14	-2432.925508	0.5004	-2410.372264	0.4443	-2386.292959	59.268	45.106488	1.60E-10	7.49E-09	0.4443	9.06
1151	MSTRG.13212.12_7	-491.508778	999	-491.921473	1	-491.392158	13.7983	-0.82539	1	1	999	29.44
1152	MSTRG.13214.1_8	-1100.19041	0.6359	-1089.00457	0.3632	-1069.098688	15.2079	22.37168	1.39E-05	0.000203328	0.3632	90
1153	MSTRG.13214.9_9	-1100.19041	0.6359	-1089.00457	0.3632	-1069.065467	15.031	22.37168	1.39E-05	0.000203328	0.3632	90
1154	MSTRG.13216.1_3	-517.654304	0.2936	-517.654305	0.2936	-517.654304	0.2936	-2.00E-06	1	1	0.2936	90
1155	MSTRG.13221.1_11	-483.269285	999	-483.690871	1	-483.269434	951.4897	-0.843172	1	1	999	29.44
1156	MSTRG.13221.3_11	-483.271123	222.2617	-483.690871	1	-483.271006	247.178	-0.839496	1	1	222.2617	29.44
1157	MSTRG.13223.1_3	-1848.043184	1.00E-04	-1848.042676	0	-1848.042601	0	0.001016	0.999492129	1	1.00E-04	90
1158	MSTRG.13226.3_4	-702.960576	1.00E-04	-702.960768	0.584	-702.960576	0	-0.000384	1	1	1.00E-04	90
1159	MSTRG.13231.1_4	-1331.731167	1.3655	-1324.363256	0.353	-1289.834732	98.8749	14.735822	0.000631185	0.005720919	0.353	90
1160	MSTRG.13234.1_2	-1723.12767	0.0062	-1720.4969	0.607	-1720.174421	4.8385	5.26154	0.072022983	0.299753336	0.0062	90
1161	MSTRG.13237.1_1	-327.153449	0.005	-322.961921	0.4515	-322.739123	10.7137	8.383056	0.015123159	0.083489152	0.4515	29.44
1162	MSTRG.13242.22_4	-2372.460686	0.433	-2362.161019	0.2495	-2320.231845	60.0838	20.599334	3.36E-05	0.000443455	0.2495	90
1163	MSTRG.13242.31_3	-2372.460686	0.433	-2362.161019	0.2495	-2320.231845	60.0838	20.599334	3.36E-05	0.000443455	0.2495	90
1164	MSTRG.13245.2_5	-723.887155	0.5798	-718.477837	0.2135	-702.416368	74.1076	10.818636	0.004474691	0.030536157	0.2135	90
1165	MSTRG.1325.1_29	-866.598302	0.9067	-864.603616	0.6763	-855.813172	11.7655	3.989372	0.136056369	0.50275502	0.9067	29.44
1166	MSTRG.13251.1_2	-370.324325	0.6395	-368.755507	0.3649	-365.371778	81.9605	3.137636	0.208291237	0.708438078	0.6395	6.65
1167	MSTRG.1326.1_3	-1131.872593	0.4883	-1122.121371	0.3686	-1098.679627	198.5088	19.502444	5.82E-05	0.000709515	0.3686	90
1168	MSTRG.13265.4_1	-1809.553968	0.4181	-1784.999525	0.2692	-1737.269564	161.9829	49.108886	2.17E-11	1.23E-09	0.2692	90
1169	MSTRG.13269.1_2	-489.19399	1.7114	-484.788464	0.4636	-484.854137	0.0233	8.811052	0.012209682	0.06999887	0.4636	29.44
1170	MSTRG.13274.5_8	-4648.019892	0.2337	-4648.019893	0.2337	-4648.019892	0.2337	-2.00E-06	1	1	0.2337	90
1171	MSTRG.13275.3_3	-532.14466	1.00E-04	-532.144291	0	-532.14425	0	0.000738	0.999631068	1	1.00E-04	90
1172	MSTRG.1328.1_1	-615.283645	1.0917	-614.020594	0.8944	-613.452555	1.5484	2.526102	0.282789917	0.904782319	1.0917	29.44
1173	MSTRG.13285.2_4	-2288.434154	0.3019	-2284.851887	0.6633	-2284.379875	25.968	7.164534	0.027812576	0.137417318	0.3019	90
1174	MSTRG.13285.8_10	-506.436393	0.8344	-504.647614	0.327	-498.411026	36.3146	3.577558	0.167164153	0.593547776	0.8344	90
1175	MSTRG.13289.2_22	-534.799204	0.134	-534.799207	0.134	-534.799204	0.134	-6.00E-06	1	1	0.134	29.44
1176	MSTRG.13289.7_3	-2043.224141	0.0095	-2043.210014	0.2383	-2043.224141	0.0095	0.028254	0.985972318	1	0.0095	90
1177	MSTRG.1329.1_9	-946.829649	0.0504	-945.736175	0.5135	-945.68679	1.1817	2.186948	0.335050504	1	0.0504	90
1178	MSTRG.13292.13_6	-2576.613679	0.5153	-2572.225123	0.3414	-2555.978725	50.6253	8.777112	0.012418649	0.070889508	0.3414	90
1179	MSTRG.13299.1_1	-198.697091	999	-199.114734	1	-198.697242	951.4616	-0.835286	1	1	999	6.65
1180	MSTRG.133.1_1	-1260.322388	0.0047	-1259.91579	0.1985	-1259.915681	0.1986	0.813196	0.665911833	1	0.0047	90
1181	MSTRG.1330.1_8	-532.281667	0.4047	-532.281667	0.4047	-532.281667	0.4047	0	1	1	0.4047	15.76
1182	MSTRG.13303.1_13	-717.949884	0.831	-707.226704	0.6385	-700.108516	79.5471	21.44636	2.20E-05	0.000306787	0.6385	29.44
1183	MSTRG.13305.4_7	-3740.399233	0.405	-3723.257891	0.1813	-3662.951837	44.4411	34.282684	3.59E-08	1.01E-06	0.1813	90
1184	MSTRG.13307.1_5	-515.056486	1.6356	-515.153287	1	-515.056486	1.6356	-0.193602	1	1	1.6356	15.76
1185	MSTRG.13310.4_14	-2435.262772	0.896	-2435.262861	0.8982	-2435.262772	0.896	-0.000178	1	1	0.896	90
1186	MSTRG.13310.6_8	-2443.978233	0.4688	-2443.978234	0.4688	-2443.978234	0.4688	-2.00E-06	1	1	0.4688	90
1187	MSTRG.1332.5_3	-1395.312545	0.0723	-1394.166711	0.7516	-1394.166711	0.7516	2.291668	0.31795863	0.99401564	0.0723	90
1188	MSTRG.13323.1_2	-531.016284	1.1475	-528.520061	0.6168	-523.28653	16.5669	4.992446	0.08239562	0.335143115	1.1475	29.44
1189	MSTRG.13339.1_6	-516.751075	999	-517.635949	1	-516.751367	951.388	-1.769748	1	1	999	15.76
1190	MSTRG.1334.6_2	-804.924429	999	-805.7325	1	-804.924715	950.9541	-1.616142	1	1	999	90
1191	MSTRG.13340.1_5	-169.850501	999	-170.220315	1	-169.850638	951.4433	-0.739628	1	1	999	9.06
1192	MSTRG.13341.1_3	-466.517732	0.2021	-466.517733	0.2021	-466.517732	0.2021	-2.00E-06	1	1	0.2021	15.76
1193	MSTRG.13347.4_2	-630.63721	1.00E-04	-630.637082	0	-630.637061	0	0.000256	0.999872008	1	1.00E-04	90
1194	MSTRG.13354.1_2	-1455.230683	1.00E-04	-1455.229652	0	-1455.229539	0	0.002062	0.998969531	1	1.00E-04	90
1195	MSTRG.13354.6_1	-764.622539	1.8055	-760.307212	0.8202	-759.890827	14.4825	8.630654	0.013362179	0.075420732	0.8202	90
1196	MSTRG.13362.5_2	-2372.817783	0.3786	-2347.66141	0.2045	-2307.481973	13.7902	50.312746	1.19E-11	7.12E-10	0.2045	90
1197	MSTRG.13363.1_5	-579.423905	0.5178	-579.423905	0.5178	-579.423897	0.5178	0	1	1	0.5178	9.06
1198	MSTRG.13364.12_5	-2156.583489	0.2701	-2148.998581	0.6792	-2148.356989	2.7093	15.169816	0.000508062	0.004749466	0.6792	90
1199	MSTRG.13365.1_4	-1732.164921	0.0073	-1732.007275	0.2168	-1732.007275	0.2168	0.315292	0.854152098	1	0.0073	90
1200	MSTRG.13366.2_6	-2863.917428	0.1115	-2863.91743	0.1114	-2863.919305	0.1124	-4.00E-06	1	1	0.1115	90
1201	MSTRG.13367.1_1	-408.171766	1.1454	-407.476327	0.7315	-400.369133	160.2744	1.390878	0.498855402	1	1.1454	29.44
1202	MSTRG.13368.1_6	-578.389756	0.7795	-574.109355	0.5573	-571.748664	1.8201	8.560802	0.013837112	0.077719068	0.5573	29.44
1203	MSTRG.13370.1_1	-553.054825	0.3327	-551.140133	0.6616	-550.621197	13.3095	3.829384	0.147387221	0.536541955	0.3327	29.44
1204	MSTRG.13372.4_5	-2814.289128	0.0459	-2814.28913	0.0459	-2814.289128	0.0459	-4.00E-06	1	1	0.0459	90
1205	MSTRG.13372.5_1	-2518.799013	0.3012	-2511.637784	0.187	-2487.334564	30.0265	14.322458	0.0007761	0.00680575	0.187	90
1206	MSTRG.13377.9_1	-288.465724	0.4054	-288.465724	0.4054	-288.465724	0.4054	0	1	1	0.4054	6.65
1207	MSTRG.13381.2_1	-588.825458	0.0177	-588.821092	0.0617	-588.825459	0.0178	0.008732	0.995643517	1	0.0177	90
1208	MSTRG.13382.1_5	-582.248445	1.34	-582.281356	1	-582.248445	1.34	-0.065822	1	1	1.34	90
1209	MSTRG.13383.1_3	-291.016784	999	-291.465211	1	-291.016809	951.4295	-0.896854	1	1	999	9.06
1210	MSTRG.13385.1_1	-399.328355	0.6791	-398.555019	0.5446	-397.628908	2.099	1.546672	0.46147103	1	0.6791	29.44
1211	MSTRG.13390.1_6	-928.03934	0.9453	-921.911909	0.6758	-906.490484	46.5833	12.254862	0.00218218	0.016726092	0.6758	29.44
1212	MSTRG.13392.1_7	-534.211336	0.1507	-532.813283	0.867	-532.38187	0.7667	2.796106	0.247077556	0.80987383	0.1507	29.44
1213	MSTRG.13398.6_2	-1184.754078	1.6187	-1179.025536	0.2511	-1148.422324	43.8248	11.457084	0.003251815	0.023224897	0.2511	90
1214	MSTRG.13401.1_6	-4985.048706	0.1716	-4981.636851	0.5837	-4981.636851	0.5837	6.82371	0.032979966	0.158027446	0.1716	90
1215	MSTRG.13401.3_7	-3397.243177	0.006	-3395.464551	0.3376	-3395.464551	0.3375	3.557252	0.168870015	0.598861814	0.006	90
1216	MSTRG.13402.2_5	-384.980821	999	-385.859259	1	-384.981121	951.4285	-1.756876	1	1	999	29.44
1217	MSTRG.13403.1_1	-293.517778	0.877	-290.484954	0.5406	-281.013072	326.1437	6.065648	0.048179387	0.214983113	0.877	29.44
1218	MSTRG.13404.1_2	-291.834575	0.6183	-291.834576	0.6183	-291.834575	0.6183	-2.00E-06	1	1	0.6183	29.44
1219	MSTRG.13408.11_7	-5570.757079	0.1784	-5570.757079	0.1784	-5570.757079	0.1785	0	1	1	0.1784	90
1220	MSTRG.1341.1_11	-2421.936733	0.4106	-2402.063453	0.6132	-2397.090395	12.0795	39.74656	2.34E-09	8.64E-08	0.6132	29.44
1221	MSTRG.13410.18_1	-869.276233	0.0792	-869.276234	0.0792	-869.276233	0.0792	-2.00E-06	1	1	0.0792	90
1222	MSTRG.13411.1_4	-487.027253	0.4875	-487.027253	0.4875	-487.027253	0.4875	0	1	1	0.4875	29.44
1223	MSTRG.13414.1_5	-1363.076349	0.5885	-1351.236246	0.4562	-1331.006357	186.1523	23.680206	7.21E-06	0.00011399	0.4562	15.76
1224	MSTRG.13415.7_24	-767.017899	0.7091	-766.339228	0.3624	-764.341373	1.0488	1.357342	0.507290734	1	0.7091	90
1225	MSTRG.13418.3_5	-1729.114303	0.6274	-1720.767375	0.2055	-1683.029885	29.3315	16.693856	0.000237124	0.002449392	0.2055	90
1226	MSTRG.13419.3_19	-707.126866	0.6966	-696.970363	0.3935	-676.656957	290.2751	20.313006	3.88E-05	0.000500606	0.3935	90
1227	MSTRG.1342.1_4	-443.425747	0.8074	-439.811942	0.6462	-437.125042	9.357	7.22761	0.02694911	0.133922581	0.8074	29.44
1228	MSTRG.13422.1_4	-7332.048659	0.0916	-7331.948845	0.0992	-7329.129052	3.751	0.199628	0.905005733	1	0.0916	90
1229	MSTRG.13422.18_15	-7892.394475	0.496	-7878.86382	0.2946	-7794.414366	29.2474	27.06131	1.33E-06	2.50E-05	0.2946	90
1230	MSTRG.13422.21_1	-770.906156	999	-771.333424	1	-770.906317	947.3695	-0.854536	1	1	999	90
1231	MSTRG.13422.25_3	-1138.006099	999	-1138.261725	1	-1138.006114	951.4337	-0.511252	1	1	999	90
1232	MSTRG.13423.1_6	-2576.561674	1.00E-04	-2576.560671	0	-2576.56056	0	0.002006	0.998997503	1	1.00E-04	90
1233	MSTRG.13425.1_12	-404.442659	999	-405.511888	1	-404.442725	951.4367	-2.138458	1	1	999	29.44
1234	MSTRG.13426.1_1	-1385.475723	0.1902	-1385.475725	0.1902	-1385.475723	0.1902	-4.00E-06	1	1	0.1902	90
1235	MSTRG.13427.11_12	-5581.74974	0.4555	-5581.74974	0.4555	-5581.74974	0.4555	0	1	1	0.4555	90
1236	MSTRG.13427.12_9	-3289.679771	0.2029	-3287.226097	0.4106	-3286.857665	3.5184	4.907348	0.085977126	0.346644957	0.2029	90
1237	MSTRG.13427.5_7	-3187.364368	0.0789	-3187.363364	0.0797	-3187.363364	0.0797	0.002008	0.998996504	1	0.0789	90
1238	MSTRG.1343.4_3	-1940.064889	0.5841	-1931.464869	0.2407	-1895.098287	31.5528	17.20004	0.000184102	0.001970992	0.2407	90
1239	MSTRG.13433.1_1	-363.112222	0.3282	-360.678553	0.3347	-359.810757	0.6536	4.867338	0.087714417	0.352507313	0.3282	90
1240	MSTRG.1344.13_5	-544.995156	999	-545.408484	1	-544.999438	124.2987	-0.826656	1	1	999	29.44
1241	MSTRG.13443.17_5	-2308.177099	0.232	-2308.1771	0.232	-2308.177099	0.232	-2.00E-06	1	1	0.232	90
1242	MSTRG.13443.37_11	-1581.298926	0.1984	-1581.298926	0.1984	-1581.298926	0.1984	0	1	1	0.1984	90
1243	MSTRG.13447.23_5	-2862.280529	0.5324	-2862.280529	0.5323	-2862.280529	0.5324	0	1	1	0.5324	90
1244	MSTRG.13447.30_2	-2980.314848	0.7401	-2960.619837	0.3303	-2879.352412	99.0021	39.390022	2.80E-09	1.01E-07	0.3303	90
1245	MSTRG.13453.1_54	-554.731993	0.361	-554.731993	0.361	-554.731993	0.361	0	1	1	0.361	15.76
1246	MSTRG.13454.1_19	-488.381289	2.2869	-488.693389	1	-488.381289	2.2869	-0.6242	1	1	2.2869	9.06
1247	MSTRG.13455.10_23	-1788.913786	0.7316	-1765.68241	0.4088	-1716.796026	258.6444	46.462752	8.14E-11	4.05E-09	0.4088	29.44
1248	MSTRG.13456.1_6	-464.685621	1.2026	-464.76675	1	-460.457437	6.0706	-0.162258	1	1	1.2026	29.44
1249	MSTRG.13457.1_1	-1099.909625	0.7792	-1079.808752	0.3061	-1032.139992	109.0512	40.201746	1.86E-09	7.04E-08	0.3061	90
1250	MSTRG.13462.3_6	-1455.015239	1.00E-04	-1455.014409	0	-1455.014318	0	0.00166	0.999170344	1	1.00E-04	90
1251	MSTRG.13462.5_2	-844.740619	1.00E-04	-844.740515	0	-844.740497	0	0.000208	0.999896005	1	1.00E-04	90
1252	MSTRG.13464.13_7	-3527.322197	0.4081	-3521.600104	0.2136	-3502.762047	8.935	11.444186	0.003272854	0.023359386	0.2136	90
1253	MSTRG.13464.17_14	-4237.920388	0.5648	-4206.848368	0.6039	-4175.674154	171.5319	62.14404	3.20E-14	3.05E-12	0.6039	90
1254	MSTRG.13464.9_5	-3373.48538	1.00E-04	-3373.485272	0	-3373.485442	1.00E-04	0.000216	0.999892006	1	1.00E-04	90
1255	MSTRG.13468.11_4	-1182.234418	0.1111	-1182.234419	0.1111	-1182.234418	0.1111	-2.00E-06	1	1	0.1111	90
1256	MSTRG.13468.8_5	-1182.234418	0.1111	-1182.234419	0.1111	-1182.234418	0.1111	-2.00E-06	1	1	0.1111	90
1257	MSTRG.13469.6_8	-3040.498777	0.0394	-3040.498781	0.0394	-3040.498777	0.0394	-8.00E-06	1	1	0.0394	90
1258	MSTRG.13470.1_12	-1795.822596	1.00E-04	-1795.821785	0	-1795.821695	0	0.001622	0.999189329	1	1.00E-04	90
1259	MSTRG.13471.2_2	-1377.279104	0.6478	-1377.279104	0.6478	-1377.279104	0.6478	0	1	1	0.6478	90
1260	MSTRG.13474.1_3	-597.571138	0.0066	-597.427149	0.7205	-595.76036	185.0324	0.287978	0.865897273	1	0.0066	90
1261	MSTRG.13475.1_1	-368.881593	0.7634	-367.994097	0.7284	-367.193144	1.4068	1.774992	0.411685323	1	0.7634	15.76
1262	MSTRG.13476.1_1	-553.007022	0.8896	-547.817502	0.449	-530.419137	198.8813	10.37904	0.005574682	0.036500278	0.449	9.06
1263	MSTRG.13477.1_5	-2382.810016	1.00E-04	-2382.807965	0	-2382.807744	0	0.004102	0.997951102	1	1.00E-04	90
1264	MSTRG.13478.10_9	-4109.837734	0.2562	-4109.837734	0.2562	-4109.840406	0.258	0	1	1	0.2562	90
1265	MSTRG.13478.15_6	-4252.160097	0.5369	-4229.655954	0.2992	-4163.594261	81.7593	45.008286	1.68E-10	7.82E-09	0.2992	90
1266	MSTRG.1348.1_2	-746.377253	0.9484	-734.014075	0.2728	-697.961256	142.1933	24.726356	4.27E-06	7.15E-05	0.2728	90
1267	MSTRG.13487.5_4	-1147.474646	0.006	-1146.584944	0.4199	-1146.584944	0.4199	1.779404	0.410778146	1	0.006	90
1268	MSTRG.1349.1_10	-938.909238	0.57	-938.909238	0.5701	-938.909238	0.5701	0	1	1	0.57	90
1269	MSTRG.1350.1_2	-209.106442	999	-210.231853	1	-209.106512	951.4372	-2.250822	1	1	999	9.06
1270	MSTRG.13504.1_3	-596.331221	0.4093	-589.635173	0.3946	-585.856186	95.1923	13.392096	0.001235786	0.010240131	0.3946	90
1271	MSTRG.13505.1_1	-211.11765	999	-211.905047	1	-211.11768	968.8795	-1.574794	1	1	999	6.65
1272	MSTRG.13506.1_2	-302.899172	0.5547	-302.899352	0.5546	-302.899172	0.5547	-0.00036	1	1	0.5547	6.65
1273	MSTRG.13507.1_3	-600.176364	232.4767	-600.791511	1	-600.173859	999	-1.230294	1	1	232.4767	6.65
1274	MSTRG.13511.1_2	-539.575164	3.9538	-540.726782	1	-539.575164	3.9538	-2.303236	1	1	3.9538	29.44
1275	MSTRG.13515.16_4	-5765.53929	0.2645	-5762.131671	0.1204	-5755.091242	0.9976	6.815238	0.033119965	0.15855462	0.2645	90
1276	MSTRG.13522.2_1	-406.363385	0.0156	-406.363392	0.0156	-406.363385	0.0156	-1.40E-05	1	1	0.0156	15.76
1277	MSTRG.13525.1_2	-606.876287	0.0149	-603.832094	0.9061	-603.832094	0.9061	6.088386	0.047634738	0.213088158	0.0149	90
1278	MSTRG.13525.1_2	-606.876287	0.0149	-603.832094	0.9061	-603.832094	0.9061	6.088386	0.047634738	0.213088158	0.0149	90
1279	MSTRG.13538.3_1	-958.448333	1.4182	-958.544825	1	-956.73396	1.6118	-0.192984	1	1	1.4182	90
1280	MSTRG.13538.5_1	-966.062293	1.5523	-966.218953	1	-961.826709	22.7931	-0.31332	1	1	1.5523	90
1281	MSTRG.13540.6_27	-691.116862	0.9697	-690.469857	0.8066	-689.479195	1.2792	1.29401	0.523611648	1	0.9697	29.44
1282	MSTRG.13547.1_4	-462.75144	0.8449	-462.597513	0.8294	-462.023542	1.3622	0.307854	0.857334604	1	0.8449	90
1283	MSTRG.13548.1_3	-472.072232	1.211	-463.709142	0.4132	-447.703296	329.2572	16.72618	0.000233322	0.002418389	0.4132	29.44
1284	MSTRG.1355.1_2	-160.324398	2.0995	-160.32438	0	-160.324385	0.9812	3.60E-05	0.999982	1	2.0995	9.06
1285	MSTRG.13550.1_2	-602.994485	0.4064	-600.49092	0.5143	-596.646709	63.06	5.00713	0.081792887	0.333204028	0.4064	29.44
1286	MSTRG.13551.3_3	-1250.331439	1.00E-04	-1250.330938	0	-1250.330851	0	0.001002	0.999499125	1	1.00E-04	90
1287	MSTRG.13560.5_2	-3288.474786	0.0108	-3287.969936	0.7245	-3288.474786	0.0108	1.0097	0.603596108	1	0.0108	90
1288	MSTRG.1357.1_7	-776.949169	0.5245	-776.949352	0.5245	-776.949484	0.5252	-0.000366	1	1	0.5245	6.65
1289	MSTRG.13578.1_2	-274.042717	0.4912	-274.042717	0.4912	-274.04289	0.4912	0	1	1	0.4912	6.65
1290	MSTRG.13584.1_5	-493.679815	0.0294	-493.679815	0.0294	-493.679816	0.029	0	1	1	0.0294	29.44
1291	MSTRG.13586.12_3	-626.023931	0.8159	-624.343608	0.8473	-623.331169	58.9418	3.360646	0.186313787	0.649121898	0.8159	90
1292	MSTRG.13593.1_3	-349.955305	0.6134	-348.813214	0.6513	-348.624895	1.8478	2.284182	0.319150979	0.996846148	0.6134	9.06
1293	MSTRG.13594.1_1	-1211.280027	0.0069	-1211.280132	0.0076	-1211.280015	0.0069	-0.00021	1	1	0.0069	6.65
1294	MSTRG.13595.8_2	-2624.536863	0.5262	-2622.824416	0.6417	-2618.711794	33.3091	3.424894	0.180423755	0.632245244	0.5262	29.44
1295	MSTRG.13599.1_11	-365.686371	0.8179	-365.686371	0.8179	-365.686371	0.8179	0	1	1	0.8179	90
1296	MSTRG.136.1_1	-1085.554771	0.062	-1085.554774	0.062	-1085.554771	0.062	-6.00E-06	1	1	0.062	90
1297	MSTRG.1360.1_22	-2978.20321	0.5155	-2977.360243	0.4265	-2968.478106	3.423	1.685934	0.430431537	1	0.5155	90
1298	MSTRG.13602.1_2	-773.93325	0.7965	-766.534137	0.3839	-742.81982	141.1732	14.798226	0.000611795	0.005569074	0.3839	29.44
1299	MSTRG.13604.2_3	-2030.771689	1.6239	-2009.810973	0.3781	-2009.810973	0.3781	41.921432	7.89E-10	3.23E-08	0.3781	29.44
1300	MSTRG.13607.1_1	-422.381779	0.6177	-418.833543	0.5553	-413.592943	84.0785	7.096472	0.028775355	0.141108629	0.6177	29.44
1301	MSTRG.13609.1_2	-503.478179	0.374	-488.881977	0.382	-483.178746	112.4892	29.192404	4.58E-07	9.86E-06	0.382	29.44
1302	MSTRG.13610.1_2	-196.759936	999	-197.378685	1	-196.759974	951.4319	-1.237498	1	1	999	6.65
1303	MSTRG.13614.1_3	-466.376078	1.0587	-466.37834	1	-466.376078	1.0587	-0.004524	1	1	1.0587	29.44
1304	MSTRG.13620.1_3	-2343.26424	0.0101	-2342.964866	0.2966	-2342.964866	0.2966	0.598748	0.741282118	1	0.0101	90
1305	MSTRG.13620.4_2	-2458.39092	0.6025	-2442.388006	0.1931	-2396.151036	57.8122	32.005828	1.12E-07	2.79E-06	0.1931	90
1306	MSTRG.1363.1_3	-939.399313	0.1137	-938.511496	0.8189	-940.506369	98.1821	1.775634	0.411553193	1	0.1137	29.44
1307	MSTRG.13634.1_1	-265.421975	0.4569	-265.01523	0.524	-264.590496	5.9158	0.81349	0.665813951	1	0.4569	29.44
1308	MSTRG.13636.1_5	-220.179946	0.61	-220.180129	0.61	-220.180134	0.61	-0.000366	1	1	0.61	9.06
1309	MSTRG.13638.2_1	-597.719439	1.1141	-597.755121	1	-593.858631	13.8245	-0.071364	1	1	1.1141	29.44
1310	MSTRG.13639.1_3	-644.381667	0.649	-643.074571	0.7978	-642.440009	42.3795	2.614192	0.270604753	0.873857967	0.649	29.44
1311	MSTRG.1364.1_2	-272.065095	4.085	-274.202831	1	-271.560427	5.3268	-4.275472	1	1	4.085	29.44
1312	MSTRG.13641.1_2	-569.658735	0.7364	-562.474437	0.534	-544.724509	364.2227	14.368596	0.000758401	0.006696151	0.534	15.76
1313	MSTRG.13642.1_11	-364.016807	0.7157	-364.016807	0.7157	-364.016807	0.7157	0	1	1	0.7157	29.44
1314	MSTRG.13646.1_5	-271.725109	0.282	-271.72511	0.282	-271.725109	0.282	-2.00E-06	1	1	0.282	29.44
1315	MSTRG.1365.1_6	-428.963651	0.7498	-427.5588	0.584	-425.936416	1.3627	2.809702	0.245403619	0.805635251	0.7498	29.44
1316	MSTRG.13654.9_1	-1654.649924	0.2535	-1653.08377	0.162	-1651.201253	0.3793	3.132308	0.208846865	0.709857877	0.2535	90
1317	MSTRG.13658.1_1	-342.609663	0.5816	-342.535292	0.6036	-341.350476	24.9485	0.148742	0.928327221	1	0.5816	29.44
1318	MSTRG.13659.1_8	-475.560941	0.8204	-472.278236	0.4937	-462.997065	127.2676	6.56541	0.03752661	0.174708502	0.8204	29.44
1319	MSTRG.1366.1_8	-615.466249	0.5534	-615.459425	0.5745	-615.459425	0.5745	0.013648	0.993199231	1	0.5534	29.44
1320	MSTRG.13660.1_1	-435.200171	0.5055	-435.043654	0.5711	-435.043186	0.5675	0.313034	0.855116981	1	0.5055	90
1321	MSTRG.13662.1_2	-376.974181	999	-377.223835	1	-376.974195	951.4309	-0.499308	1	1	999	6.65
1322	MSTRG.13664.1_1	-1174.080373	0.5243	-1173.297228	0.4984	-1170.555096	9.6006	1.56629	0.456966589	1	0.5243	90
1323	MSTRG.13675.1_1	-1481.453333	1.0904	-1479.254291	0.6296	-1467.796354	50.6237	4.398084	0.110909359	0.426287697	1.0904	90
1324	MSTRG.13677.3_6	-739.851729	999	-740.703611	1	-739.85206	948.9834	-1.703764	1	1	999	29.44
1325	MSTRG.13689.1_1	-156.158541	0.3377	-156.158541	0.3377	-156.158541	0.3377	0	1	1	0.3377	29.44
1326	MSTRG.13692.1_1	-346.359644	0.6022	-343.476651	0.6387	-342.624639	2.1568	5.765986	0.055967003	0.243969079	0.6022	29.44
1327	MSTRG.13694.1_11	-5608.172822	1.00E-04	-5608.171287	0	-5608.171117	0	0.00307	0.998466178	1	1.00E-04	90
1328	MSTRG.13694.52_4	-6680.695379	1.00E-04	-6680.694038	0	-6680.693891	0	0.002682	0.998659899	1	1.00E-04	90
1329	MSTRG.13694.55_4	-5599.605262	1.00E-04	-5599.603916	0	-5599.603768	0	0.002692	0.998654905	1	1.00E-04	90
1330	MSTRG.13698.1_1	-754.223452	0.4312	-745.014398	0.7548	-744.521485	3.303	18.418108	0.000100129	0.001148088	0.7548	29.44
1331	MSTRG.13703.1_1	-484.894134	0.5339	-484.894311	0.5336	-484.894311	0.5338	-0.000354	1	1	0.5339	90
1332	MSTRG.13707.1_1	-399.186999	0.9277	-399.143045	0.9024	-398.188513	50.6765	0.087908	0.956997978	1	0.9277	90
1333	MSTRG.13708.1_2	-530.938914	0.8946	-526.685144	0.5124	-514.992717	226.8346	8.50754	0.014210559	0.079446188	0.5124	29.44
1334	MSTRG.13714.1_3	-847.559914	0.6097	-842.11819	0.5362	-837.879569	69.8497	10.883448	0.004332008	0.029744771	0.5362	29.44
1335	MSTRG.1372.5_1	-291.872485	1.00E-04	-291.872485	0	-291.872485	0	0	1	1	1.00E-04	15.76
1336	MSTRG.13723.1_1	-156.213424	1.00E-04	-156.213491	0.3493	-156.213424	0	-0.000134	1	1	1.00E-04	6.65
1337	MSTRG.13725.10_2	-1632.001772	0.5915	-1628.833673	0.787	-1628.644198	1.2915	6.336198	0.042083523	0.192742352	0.5915	90
1338	MSTRG.13726.1_2	-432.188888	0.6658	-428.608561	0.6403	-427.754697	1.2978	7.160654	0.027866584	0.137512851	0.6658	15.76
1339	MSTRG.13727.1_2	-442.618784	1.00E-04	-442.618197	0	-442.618134	0	0.001174	0.999413172	1	1.00E-04	6.65
1340	MSTRG.13728.10_5	-523.954021	0.3516	-523.954021	0.3516	-523.954021	0.3516	0	1	1	0.3516	9.06
1341	MSTRG.1375.1_4	-310.173977	999	-310.593503	1	-310.175118	762.2538	-0.839052	1	1	999	29.44
1342	MSTRG.13753.1_20	-776.101983	0.49	-770.184886	0.4108	-764.794628	151.4863	11.834194	0.002693007	0.019919775	0.4108	29.44
1343	MSTRG.13756.1_1	-305.430138	1.6823	-305.604136	1	-303.172641	7.6277	-0.347996	1	1	1.6823	6.65
1344	MSTRG.13757.1_2	-471.959376	0.5777	-467.233365	0.4383	-457.571642	137.2675	9.452022	0.00886175	0.053747226	0.4383	6.65
1345	MSTRG.1376.2_4	-2529.592009	0.0097	-2528.833471	0.3933	-2528.833471	0.3933	1.517076	0.468350655	1	0.0097	90
1346	MSTRG.13762.1_2	-347.49828	1.4666	-346.105402	0.707	-343.134094	15.881	2.785756	0.248359496	0.813571562	1.4666	29.44
1347	MSTRG.13764.2_2	-619.321184	21.885	-619.473502	1	-619.313437	998.9998	-0.304636	1	1	21.885	90
1348	MSTRG.13764.3_1	-2008.003945	1.00E-04	-2008.003816	0	-2008.003806	0	0.000258	0.999871008	1	1.00E-04	90
1349	MSTRG.1377.1_3	-234.073381	0.7373	-234.073381	0.7373	-234.073381	0.7373	0	1	1	0.7373	6.65
1350	MSTRG.13777.1_2	-312.426855	2.1	-312.426865	0.6868	-312.426864	0.7765	-2.00E-05	1	1	2.1	15.76
1351	MSTRG.13778.2_2	-3668.33736	0.1628	-3666.115829	0.0687	-3661.292017	1.0351	4.443062	0.108442956	0.418251727	0.1628	90
1352	MSTRG.13778.4_4	-3797.970863	0.1426	-3795.776534	0.0851	-3792.078493	0.3365	4.388658	0.111433308	0.427864664	0.1426	90
1353	MSTRG.13778.57_6	-1522.849734	999	-1523.574222	1	-1522.849778	951.4379	-1.448976	1	1	999	90
1354	MSTRG.13786.1_8	-391.458602	0.4637	-387.541241	0.6427	-384.940994	121.9277	7.834722	0.019893525	0.104376863	0.4637	29.44
1355	MSTRG.13787.5_4	-469.362396	0.3134	-469.096274	0.3816	-469.047849	0.4694	0.532244	0.766345628	1	0.3134	15.76
1356	MSTRG.13787.7_3	-400.510711	921.9678	-400.946767	1	-400.51081	967.3629	-0.872112	1	1	921.9678	15.76
1357	MSTRG.13788.1_2	-460.39689	0.4128	-454.02361	0.3799	-448.947835	89.7112	12.74656	0.001706553	0.013486036	0.3799	6.65
1358	MSTRG.1379.1_1	-416.588422	0.8611	-416.0863	0.8178	-412.676233	35.146	1.004244	0.605244966	1	0.8611	29.44
1359	MSTRG.13797.2_1	-2109.772006	0.0061	-2105.707803	0.5531	-2105.707803	0.5531	8.128406	0.017176674	0.092716264	0.5531	90
1360	MSTRG.13799.1_4	-1432.545685	0.2029	-1431.581469	0.183	-1424.826271	19.1931	1.928432	0.381282008	1	0.2029	90
1361	MSTRG.13802.1_1	-360.788344	0.4801	-360.733147	0.5032	-360.733147	0.5032	0.110394	0.946298709	1	0.4801	29.44
1362	MSTRG.13803.1_2	-653.647948	0.9299	-653.599695	0.8633	-653.531514	1.0196	0.096506	0.952892675	1	0.9299	90
1363	MSTRG.13804.1_1	-211.373593	0.2072	-211.373622	0.2072	-211.373593	0.2072	-5.80E-05	1	1	0.2072	29.44
1364	MSTRG.1381.1_1	-776.641209	0.3414	-772.61511	0.2809	-763.793128	30.6469	8.052198	0.017843803	0.095687111	0.2809	90
1365	MSTRG.13813.1_4	-413.430965	0.2706	-413.430976	0.2706	-413.430965	0.2706	-2.20E-05	1	1	0.2706	29.44
1366	MSTRG.13815.1_1	-747.242596	0.4111	-740.720017	0.3441	-730.536546	145.5787	13.045158	0.001469873	0.011881992	0.3441	90
1367	MSTRG.13823.1_1	-483.935943	0.4952	-483.707456	0.5587	-483.616216	1.432	0.456974	0.795736642	1	0.4952	29.44
1368	MSTRG.13827.7_1	-2079.142946	1.00E-04	-2079.142288	0	-2079.142217	0	0.001316	0.999342216	1	1.00E-04	90
1369	MSTRG.13836.2_1	-925.093456	0.4417	-923.638087	0.663	-923.41098	1.3022	2.910738	0.233314255	0.775210156	0.4417	90
1370	MSTRG.13838.1_1	-273.241237	0.599	-273.241237	0.599	-273.241411	0.5989	0	1	1	0.599	6.65
1371	MSTRG.1384.2_3	-2291.633537	0.0079	-2291.504955	0.2742	-2291.504955	0.2742	0.257164	0.879341453	1	0.0079	90
1372	MSTRG.13840.1_9	-464.327521	1.9933	-464.538306	1	-464.327521	1.9933	-0.42157	1	1	1.9933	90
1373	MSTRG.13843.4_3	-1687.532647	1.00E-04	-1687.532168	0	-1687.532116	0	0.000958	0.999521115	1	1.00E-04	90
1374	MSTRG.13844.7_1	-1690.105096	0.7859	-1680.563209	0.2777	-1651.078202	110.4462	19.083774	7.18E-05	0.000856476	0.2777	90
1375	MSTRG.13849.1_1	-533.496416	0.6303	-532.65327	0.5931	-531.448732	1.6349	1.686292	0.430354496	1	0.6303	29.44
1376	MSTRG.13854.6_15	-6917.491297	0.0039	-6917.057815	0.17	-6917.057815	0.17	0.866964	0.648247961	1	0.0039	90
1377	MSTRG.13858.1_3	-465.453567	1.00E-04	-465.45347	0	-465.453453	0	0.000194	0.999903005	1	1.00E-04	29.44
1378	MSTRG.13865.1_6	-687.793766	0.6279	-684.04285	0.701	-681.714337	69.5181	7.501832	0.023496213	0.119850637	0.6279	29.44
1379	MSTRG.13866.20_10	-1783.626736	999	-1784.043531	1	-1783.626902	949.5528	-0.83359	1	1	999	90
1380	MSTRG.13869.12_2	-2782.757745	0.4201	-2777.630065	0.1925	-2758.243781	18.4438	10.25536	0.005930303	0.03831874	0.1925	90
1381	MSTRG.13870.1_1	-532.046278	0.0079	-529.813581	0.7664	-529.813581	0.7664	4.465394	0.107238817	0.414590126	0.0079	29.44
1382	MSTRG.13875.6_3	-320.648793	2.1	-320.648795	1	-320.648784	72.7803	-4.00E-06	1	1	2.1	90
1383	MSTRG.13881.1_1	-246.652764	1.00E-04	-246.652883	0.5657	-246.652764	0	-0.000238	1	1	1.00E-04	15.76
1384	MSTRG.13883.1_1	-431.702627	0.5033	-431.702627	0.5033	-431.703151	0.5032	0	1	1	0.5033	6.65
1385	MSTRG.13884.1_4	-264.728852	999	-265.177327	1	-264.729013	951.4621	-0.89695	1	1	999	15.76
1386	MSTRG.13891.1_4	-443.483768	1.9208	-443.670215	1	-443.483768	1.9208	-0.372894	1	1	1.9208	29.44
1387	MSTRG.13896.3_2	-276.962404	999	-278.192377	1	-276.962404	999	-2.459946	1	1	999	15.76
1388	MSTRG.13898.3_20	-414.210673	1.2692	-414.231947	1	-414.210673	1.2692	-0.042548	1	1	1.2692	9.06
1389	MSTRG.13898.6_4	-458.666014	0.4793	-457.846784	0.9115	-457.846784	0.9115	1.63846	0.440770917	1	0.4793	15.76
1390	MSTRG.139.2_2	-1619.793692	1.00E-04	-1619.793356	0	-1619.793146	0	0.000672	0.999664056	1	1.00E-04	90
1391	MSTRG.139.2_2	-1619.793692	1.00E-04	-1619.793356	0	-1619.793146	0	0.000672	0.999664056	1	1.00E-04	90
1392	MSTRG.13913.12_2	-361.757606	2.0999	-361.757536	0.344	-361.757327	0	0.00014	0.999930002	1	2.0999	90
1393	MSTRG.13913.4_7	-3519.706032	0.2191	-3519.706805	0.2191	-3519.706798	0.2191	-0.001546	1	1	0.2191	90
1394	MSTRG.1392.1_1	-246.459221	0.0894	-246.459224	0.0894	-246.459221	0.0894	-6.00E-06	1	1	0.0894	6.65
1395	MSTRG.13921.1_6	-2799.305239	0.1317	-2799.305589	0.1317	-2799.305589	0.1317	-0.0007	1	1	0.1317	90
1396	MSTRG.13928.1_13	-1387.219995	1.6914	-1387.686839	1	-1387.219995	1.6914	-0.933688	1	1	1.6914	90
1397	MSTRG.13929.1_4	-276.501062	1.00E-04	-276.500948	0	-276.500929	0	0.000228	0.999886006	1	1.00E-04	15.76
1398	MSTRG.13930.1_2	-436.34089	999	-437.425452	1	-436.340955	951.4406	-2.169124	1	1	999	15.76
1399	MSTRG.13936.1_1	-456.829964	0.0112	-453.205391	0.7566	-453.205391	0.7566	7.249146	0.026660479	0.132862764	0.0112	29.44
1400	MSTRG.13939.1_6	-622.19277	0.5019	-620.316123	0.6738	-619.10995	6.0299	3.753294	0.153102599	0.553561012	0.5019	9.06
1401	MSTRG.1394.1_8	-2680.571166	0.4377	-2673.340872	0.2644	-2651.463275	10.32	14.460588	0.000724308	0.006419243	0.2644	90
1402	MSTRG.13941.1_1	-145.000562	263.014	-145.36181	1	-145.00128	263.948	-0.722496	1	1	263.014	29.44
1403	MSTRG.13948.1_1	-178.035429	999	-178.450406	1	-178.035577	951.4359	-0.829954	1	1	999	90
1404	MSTRG.13949.1_11	-340.155335	0.2629	-340.155336	0.2632	-340.155566	0.2629	-2.00E-06	1	1	0.2629	29.44
1405	MSTRG.1395.9_3	-423.420531	2.1	-423.420518	0.3862	-423.420521	0.5158	2.60E-05	0.999987	1	2.1	90
1406	MSTRG.13950.1_1	-157.442277	999	-157.791033	1	-157.193129	36.8162	-0.697512	1	1	999	29.44
1407	MSTRG.13950.1_1	-157.442277	999	-157.791033	1	-157.193129	36.8162	-0.697512	1	1	999	29.44
1408	MSTRG.13953.1_1	-458.9179	0.0094	-458.732256	0.6331	-458.385971	26.54	0.371288	0.830569225	1	0.0094	29.44
1409	MSTRG.13958.1_1	-222.291398	0.7509	-221.914108	0.6758	-220.851708	1.8163	0.75458	0.685717187	1	0.7509	29.44
1410	MSTRG.1396.1_7	-423.420531	2.1	-423.420496	0	-423.420496	0	7.00E-05	0.999965001	1	2.1	90
1411	MSTRG.13961.11_1	-442.580288	0.4796	-442.580288	0.4796	-442.580456	0.4796	0	1	1	0.4796	29.44
1412	MSTRG.13966.1_2	-202.162658	1.00E-04	-202.162541	0	-202.162522	0	0.000234	0.999883007	1	1.00E-04	90
1413	MSTRG.13969.1_1	-294.72761	0.5512	-294.72761	0.5512	-294.727793	0.5511	0	1	1	0.5512	6.65
1414	MSTRG.1397.3_5	-2478.464871	0.855	-2473.263557	0.3043	-2449.625158	25.7087	10.402628	0.00550932	0.036150494	0.3043	90
1415	MSTRG.13971.1_1	-569.654586	73.6003	-569.857924	1	-569.651699	999	-0.406676	1	1	73.6003	29.44
1416	MSTRG.13974.5_2	-1004.807365	1.00E-04	-1004.807275	0	-1004.807259	0	0.00018	0.999910004	1	1.00E-04	90
1417	MSTRG.13975.1_5	-1726.051345	0.4705	-1726.051345	0.4705	-1726.063684	0.4796	0	1	1	0.4705	90
1418	MSTRG.13976.1_2	-409.087474	0.3254	-407.338388	0.3462	-405.507422	1.2733	3.498172	0.173932845	0.614179493	0.3254	29.44
1419	MSTRG.13980.1_4	-476.803875	0.3204	-476.803878	0.3204	-476.803875	0.3204	-6.00E-06	1	1	0.3204	90
1420	MSTRG.13981.1_5	-2226.936622	1.00E-04	-2226.93528	0	-2226.935136	0	0.002684	0.9986589	1	1.00E-04	90
1421	MSTRG.13981.5_1	-2439.811279	0.4112	-2421.654843	0.2469	-2394.941357	111.063	36.312872	1.30E-08	4.07E-07	0.2469	90
1422	MSTRG.13984.4_13	-2128.090659	0.5769	-2108.10872	0.28	-2059.415938	95.0718	39.963878	2.10E-09	7.80E-08	0.28	90
1423	MSTRG.13987.1_1	-212.03956	37.5945	-212.20148	1	-212.034917	998.9999	-0.32384	1	1	37.5945	29.44
1424	MSTRG.13992.1_30	-646.366549	1.3672	-646.404198	1	-646.366549	1.3672	-0.075298	1	1	1.3672	29.44
1425	MSTRG.13997.1_11	-286.304858	999	-286.490117	1	-286.304876	949.8649	-0.370518	1	1	999	6.65
1426	MSTRG.14001.5_2	-314.635008	999	-315.4879	1	-314.63509	960.0135	-1.705784	1	1	999	29.44
1427	MSTRG.14005.1_2	-389.887169	0.5309	-389.887169	0.5309	-389.887338	0.5308	0	1	1	0.5309	6.65
1428	MSTRG.14015.3_1	-2166.879732	0.4999	-2142.747593	0.3774	-2116.609858	286.2562	48.264278	3.31E-11	1.79E-09	0.3774	90
1429	MSTRG.14022.1_12	-508.004948	0.7147	-507.758525	0.781	-507.608927	1.1932	0.492846	0.781591542	1	0.7147	29.44
1430	MSTRG.14030.1_8	-522.429148	0.0075	-522.429153	0.0075	-522.429158	0.0075	-1.00E-05	1	1	0.0075	29.44
1431	MSTRG.14033.1_3	-1358.366631	1.09	-1358.388943	1	-1345.813757	21.2307	-0.044624	1	1	1.09	29.44
1432	MSTRG.14064.1_11	-972.981207	0.6865	-967.8177	0.7158	-964.65993	5.6349	10.327014	0.005721599	0.037231751	0.7158	29.44
1433	MSTRG.14067.1_4	-1887.306833	1.00E-04	-1887.305903	0	-1887.3058	0	0.00186	0.999070432	1	1.00E-04	90
1434	MSTRG.14068.1_8	-243.50126	1.00E-04	-243.501202	0	-243.501129	0	0.000116	0.999942002	1	1.00E-04	29.44
1435	MSTRG.14074.8_5	-544.005009	0.0703	-544.005009	0.0703	-544.005102	0.7825	0	1	1	0.0703	29.44
1436	MSTRG.14079.1_4	-407.450264	1.0715	-407.466475	1	-407.01065	1.2048	-0.032422	1	1	1.0715	15.76
1437	MSTRG.14083.1_6	-487.291502	0.9364	-487.253487	0.8736	-487.220841	1.0031	0.07603	0.9626985	1	0.9364	29.44
1438	MSTRG.14084.1_37	-1100.691698	999	-1101.779982	1	-1100.691698	999	-2.176568	1	1	999	29.44
1439	MSTRG.14087.1_1	-332.555569	0.6047	-332.555569	0.6047	-332.555569	0.6047	0	1	1	0.6047	9.06
1440	MSTRG.14089.3_1	-423.650895	1.0032	-423.649294	1	-423.64929	1.0037	0.003202	0.998400281	1	1.0032	90
1441	MSTRG.14089.5_1	-655.244924	0.9658	-655.232876	0.9689	-655.233173	0.9692	0.024096	0.988024287	1	0.9658	90
1442	MSTRG.141.5_6	-1629.295573	0.089	-1626.413461	0.5149	-1626.413461	0.5149	5.764224	0.056016331	0.244133805	0.089	90
1443	MSTRG.14100.1_1	-155.840975	999	-156.441846	1	-154.325316	138.8258	-1.201742	1	1	999	29.44
1444	MSTRG.14106.1_1	-205.240073	2.1784	-205.25466	0.5919	-202.8552	3.2534	-0.029174	1	1	2.1784	15.76
1445	MSTRG.14118.13_1	-633.017178	0.5518	-633.01735	0.5518	-633.01735	0.5518	-0.000344	1	1	0.5518	90
1446	MSTRG.14143.8_1	-649.369657	0.4579	-645.258103	0.7909	-644.871669	3.2613	8.223108	0.016382297	0.089252507	0.7909	90
1447	MSTRG.14144.1_1	-168.546162	2.1	-168.54616	0.6822	-168.546155	1	4.00E-06	0.999998	1	2.1	6.65
1448	MSTRG.14154.35_6	-3451.079281	0.1367	-3451.079281	0.1367	-3451.079281	0.1367	0	1	1	0.1367	90
1449	MSTRG.14161.1_1	-313.902049	0.7967	-308.680305	0.4943	-302.282122	14.5511	10.443488	0.005397907	0.035540841	0.4943	90
1450	MSTRG.14162.2_3	-1656.276827	0.3021	-1656.276829	0.3021	-1656.276827	0.3021	-4.00E-06	1	1	0.3021	90
1451	MSTRG.14168.2_3	-392.331489	1.00E-04	-392.331215	0	-392.331185	0	0.000548	0.999726038	1	1.00E-04	29.44
1452	MSTRG.1417.5_1	-1281.40747	1.1239	-1279.562522	0.5713	-1269.024762	8.5686	3.689896	0.158033538	0.568474665	1.1239	90
1453	MSTRG.14178.1_1	-215.2595	227.7288	-215.67716	1	-215.257724	999	-0.83532	1	1	227.7288	6.65
1454	MSTRG.14179.1_2	-365.690595	1.6122	-365.781184	1	-365.690595	1.6122	-0.181178	1	1	1.6122	15.76
1455	MSTRG.14180.1_2	-962.429323	0.6374	-957.176806	0.5407	-951.046332	43.9356	10.505034	0.005234327	0.034582195	0.5407	90
1456	MSTRG.14189.4_2	-2562.603699	1.00E-04	-2562.603126	0	-2562.603063	0	0.001146	0.999427164	1	1.00E-04	90
1457	MSTRG.14192.1_6	-380.696117	0.6428	-379.060707	0.5495	-374.578653	8.4849	3.27082	0.194872457	0.671530678	0.6428	15.76
1458	MSTRG.14195.1_1	-218.404592	1.3478	-218.43843	1	-215.642299	4.0831	-0.067676	1	1	1.3478	29.44
1459	MSTRG.14196.1_9	-557.205514	1.6706	-557.318161	1	-557.205514	1.6706	-0.225294	1	1	1.6706	29.44
1460	MSTRG.14197.1_2	-522.006972	0.6679	-518.629065	0.5104	-511.765532	113.4268	6.755814	0.034118791	0.162453976	0.6679	90
1461	MSTRG.14198.1_2	-343.141239	999	-343.568088	1	-343.141384	951.6057	-0.853698	1	1	999	15.76
1462	MSTRG.142.8_1	-193.211449	2.1	-193.211387	0	-193.211387	0	0.000124	0.999938002	1	2.1	90
1463	MSTRG.1420.1_1	-542.63535	1.7029	-534.604979	0.717	-534.604979	0.717	16.060742	0.000325427	0.003247646	0.717	29.44
1464	MSTRG.14200.20_3	-3306.567764	0.6093	-3291.999524	0.19	-3238.073438	50.3291	29.13648	4.71E-07	1.01E-05	0.19	90
1465	MSTRG.14211.6_6	-5088.783518	0.4176	-5078.769615	0.191	-5031.904696	18.0074	20.027806	4.48E-05	0.000567171	0.191	90
1466	MSTRG.14217.1_1	-342.505312	1.00E-04	-342.50508	0	-342.505045	0	0.000464	0.999768027	1	1.00E-04	90
1467	MSTRG.14224.1_24	-534.443334	0.5303	-534.443513	0.5315	-534.443511	0.5302	-0.000358	1	1	0.5303	29.44
1468	MSTRG.14225.19_9	-6544.932806	0.0055	-6542.571359	0.6949	-6542.571359	0.6949	4.722894	0.094283696	0.373445345	0.0055	90
1469	MSTRG.14228.2_4	-569.598742	0.1647	-569.598743	0.1647	-569.598742	0.1647	-2.00E-06	1	1	0.1647	29.44
1470	MSTRG.14229.3_7	-5268.094987	0.0042	-5264.732997	0.6089	-5263.571319	0.4571	6.72398	0.034666205	0.16450506	0.0042	90
1471	MSTRG.14236.1_1	-255.915514	1.00E-04	-255.915413	0	-255.915388	0	0.000202	0.999899005	1	1.00E-04	6.65
1472	MSTRG.14248.1_4	-456.936534	0.8263	-456.150965	0.8448	-451.967858	173.0392	1.571138	0.455860243	1	0.8263	6.65
1473	MSTRG.1425.28_6	-2375.697707	0.3749	-2373.273996	0.5139	-2372.696485	4.5509	4.847422	0.088592241	0.355292674	0.3749	90
1474	MSTRG.14250.13_6	-1231.888644	0.5866	-1210.483958	0.5351	-1178.617627	267.6474	42.809372	5.06E-10	2.15E-08	0.5351	29.44
1475	MSTRG.14250.7_3	-3229.361972	0.2308	-3229.361972	0.2308	-3229.361978	0.2308	0	1	1	0.2308	90
1476	MSTRG.14254.1_3	-201.433124	1.00E-04	-201.433124	0	-201.433124	0	0	1	1	1.00E-04	15.76
1477	MSTRG.14262.1_5	-418.058487	999	-418.86379	1	-418.05879	951.4364	-1.610606	1	1	999	90
1478	MSTRG.14266.1_2	-251.940839	0.1703	-249.673376	0.0649	-247.917709	0.4964	4.534926	0.103574616	0.403075975	0.1703	6.65
1479	MSTRG.14273.1_1	-317.179977	0.4608	-315.528128	0.4211	-310.88739	166.9359	3.303698	0.191695136	0.663499773	0.4608	29.44
1480	MSTRG.14277.1_13	-859.094471	0.8359	-855.953819	0.6998	-849.843645	107.503	6.281304	0.043254587	0.196912155	0.8359	29.44
1481	MSTRG.14281.10_7	-3268.894802	1.00E-04	-3268.893394	0	-3268.893288	0	0.002816	0.998592991	1	1.00E-04	90
1482	MSTRG.14288.1_1	-830.248586	2.1552	-831.052884	1	-830.178854	2.2597	-1.608596	1	1	2.1552	29.44
1483	MSTRG.14304.1_2	-428.793909	3.5876	-424.324938	0.3996	-406.934945	258.289	8.937942	0.011459101	0.066470328	0.3996	90
1484	MSTRG.14308.1_8	-301.000201	1.00E-04	-301.000072	0	-301.000054	0	0.000258	0.999871008	1	1.00E-04	15.76
1485	MSTRG.14315.1_1	-290.028851	2.876	-290.676773	1	-288.527675	4.268	-1.295844	1	1	2.876	29.44
1486	MSTRG.14316.1_4	-498.484281	0.722	-498.403006	0.7707	-497.874846	1.3815	0.16255	0.921940123	1	0.722	29.44
1487	MSTRG.14317.1_1	-251.493676	1.00E-04	-251.493576	0	-251.493557	0	0.0002	0.999900005	1	1.00E-04	29.44
1488	MSTRG.14317.1_1	-251.493676	1.00E-04	-251.493576	0	-251.493557	0	0.0002	0.999900005	1	1.00E-04	29.44
1489	MSTRG.14324.1_4	-424.244536	0.6005	-419.339646	0.4084	-415.695553	1.6339	9.80978	0.007410258	0.046203755	0.4084	90
1490	MSTRG.14335.2_2	-259.873717	1.00E-04	-259.873612	0	-259.873594	0	0.00021	0.999895006	1	1.00E-04	6.65
1491	MSTRG.14349.1_5	-507.349056	176.6652	-507.778689	1	-507.345869	998.9992	-0.859266	1	1	176.6652	9.06
1492	MSTRG.14350.1_2	-618.05262	0.8914	-615.637355	0.682	-610.817566	21.8252	4.83053	0.08934366	0.35756056	0.8914	29.44
1493	MSTRG.14351.1_2	-867.05975	0.9708	-863.976137	0.6088	-855.96968	7.6454	6.167226	0.045793505	0.206647101	0.9708	29.44
1494	MSTRG.14353.1_3	-351.831157	999	-352.056456	1	-352.056456	1	-0.450598	1	1	999	9.06
1495	MSTRG.14354.1_4	-385.471792	0.7077	-385.471792	0.7077	-385.471792	0.7077	0	1	1	0.7077	9.06
1496	MSTRG.14356.1_2	-490.469008	366.4369	-490.87682	1	-490.469009	402.0204	-0.815624	1	1	366.4369	9.06
1497	MSTRG.14359.1_2	-297.570782	0.8241	-297.570782	0.8241	-297.570782	0.8241	0	1	1	0.8241	29.44
1498	MSTRG.1436.1_7	-710.938887	48.8209	-711.71115	1	-710.848971	999	-1.544526	1	1	48.8209	6.65
1499	MSTRG.14360.1_1	-299.764147	1.6134	-299.689837	0.5836	-293.04672	52.6766	0.14862	0.92838385	1	1.6134	15.76
1500	MSTRG.14362.1_1	-152.102591	2.0916	-152.102572	0.1022	-152.102562	0.1464	3.80E-05	0.999981	1	2.0916	15.76
1501	MSTRG.14363.1_16	-755.78124	1.2972	-754.95515	0.7403	-751.252043	1.8728	1.65218	0.437757577	1	1.2972	29.44
1502	MSTRG.1437.1_1	-623.222774	0.5562	-615.257556	0.5491	-610.54134	23.8039	15.930436	0.000347336	0.003425591	0.5491	29.44
1503	MSTRG.14375.4_2	-3170.471774	0.0037	-3170.471779	0.0038	-3170.471774	0.0037	-1.00E-05	1	1	0.0037	90
1504	MSTRG.14383.1_3	-1050.957969	0.3519	-1045.830097	0.5404	-1042.674256	68.3427	10.255744	0.005929164	0.03831874	0.5404	29.44
1505	MSTRG.14385.1_3	-645.844919	0.521	-645.844919	0.521	-645.844919	0.521	0	1	1	0.521	90
1506	MSTRG.14387.1_5	-718.535632	0.5715	-715.129039	0.6432	-710.568404	5.5208	6.813186	0.033153964	0.158681471	0.5715	29.44
1507	MSTRG.14401.1_2	-165.334594	0.8853	-165.334594	0.8853	-165.334594	0.8853	0	1	1	0.8853	29.44
1508	MSTRG.14405.2_9	-5623.220326	0.0902	-5623.220328	0.0902	-5623.220334	0.0902	-4.00E-06	1	1	0.0902	90
1509	MSTRG.14413.2_1	-674.158331	1.2694	-670.051101	0.3741	-657.179914	49.0012	8.21446	0.016453287	0.089593124	0.3741	90
1510	MSTRG.14415.4_1	-2457.74518	1.00E-04	-2457.744912	0	-2457.744873	0	0.000536	0.999732036	1	1.00E-04	90
1511	MSTRG.14417.1_1	-877.361073	0.1647	-877.361361	0.1647	-877.361073	0.1647	-0.000576	1	1	0.1647	90
1512	MSTRG.14422.5_10	-6507.6615	0.1278	-6507.661504	0.1278	-6507.6615	0.1278	-8.00E-06	1	1	0.1278	90
1513	MSTRG.14423.1_6	-674.684221	0.4555	-667.670052	0.4834	-660.862939	159.5883	14.028338	0.000899053	0.007759877	0.4834	15.76
1514	MSTRG.14426.12_3	-3383.251034	2.0998	-3383.250905	0.2575	-3383.250768	0	0.000258	0.999871008	1	2.0998	90
1515	MSTRG.14430.1_2	-453.382093	1.1	-453.405767	1	-451.585082	1.5338	-0.047348	1	1	1.1	29.44
1516	MSTRG.14433.1_4	-435.753112	2.1	-435.753099	0.2142	-435.753077	0	2.60E-05	0.999987	1	2.1	6.65
1517	MSTRG.14438.6_3	-958.393122	0.6967	-947.396556	0.3816	-929.344407	173.0866	21.993132	1.68E-05	0.000240529	0.3816	29.44
1518	MSTRG.14447.1_2	-165.527175	1.00E-04	-165.526615	0	-165.526558	0	0.00112	0.999440157	1	1.00E-04	6.65
1519	MSTRG.14448.1_2	-479.546417	0.3328	-479.546418	0.3328	-479.546417	0.3328	-2.00E-06	1	1	0.3328	29.44
1520	MSTRG.14449.1_5	-314.25663	999	-314.708943	1	-314.256784	950.9347	-0.904626	1	1	999	15.76
1521	MSTRG.14450.1_2	-402.866432	2.1	-402.866413	0.1787	-402.866421	0.4624	3.80E-05	0.999981	1	2.1	29.44
1522	MSTRG.14453.1_42	-703.982102	0.2334	-702.673154	0.7206	-702.673154	0.7206	2.617896	0.270104056	0.872374246	0.2334	29.44
1523	MSTRG.14455.1_2	-233.899527	516.3743	-234.543801	1	-233.899337	588.0237	-1.288548	1	1	516.3743	9.06
1524	MSTRG.14472.2_7	-4718.897173	0.748	-4718.897173	0.748	-4718.897173	0.748	0	1	1	0.748	90
1525	MSTRG.14473.2_4	-2483.036105	0.801	-2478.626342	0.2249	-2458.695607	47.2262	8.819526	0.012158059	0.069794015	0.2249	90
1526	MSTRG.14478.5_63	-2158.554152	0.7537	-2148.861778	0.7463	-2130.150874	117.6576	19.384748	6.18E-05	0.00074864	0.7463	90
1527	MSTRG.1448.24_4	-2883.003938	0.5869	-2882.233436	0.753	-2882.153779	1.1823	1.541004	0.462780694	1	0.5869	90
1528	MSTRG.14485.1_2	-219.038291	999	-219.481662	1	-219.038449	951.4653	-0.886742	1	1	999	6.65
1529	MSTRG.14486.1_4	-5819.56517	0.2497	-5807.460728	0.141	-5775.431409	15.2242	24.208884	5.53E-06	9.00E-05	0.141	90
1530	MSTRG.14500.5_1	-242.541818	2.1	-242.54181	0.2704	-242.541812	0.612	1.60E-05	0.999992	1	2.1	90
1531	MSTRG.14501.1_2	-1247.603504	0.2541	-1247.603505	0.2541	-1247.603504	0.2541	-2.00E-06	1	1	0.2541	90
1532	MSTRG.14504.1_3	-244.207958	0.9778	-244.185042	0.8603	-243.984707	1.2668	0.045832	0.977344577	1	0.9778	15.76
1533	MSTRG.14506.6_4	-496.465091	999	-497.270616	1	-496.465132	957.703	-1.61105	1	1	999	90
1534	MSTRG.14508.1_5	-992.927193	0.9014	-986.514794	0.5199	-968.914329	14.1181	12.824798	0.001641083	0.013027057	0.5199	15.76
1535	MSTRG.14513.1_4	-256.995882	0.4196	-251.519394	0.2889	-240.197521	95.1473	10.952976	0.004183998	0.028831427	0.2889	29.44
1536	MSTRG.14518.1_4	-1689.151597	0.5989	-1677.805697	0.6103	-1675.064488	0.9967	22.6918	1.18E-05	0.000176789	0.6103	29.44
1537	MSTRG.14519.1_1	-590.492857	0.8378	-590.04125	0.7404	-589.579955	0.9643	0.903214	0.636604306	1	0.8378	90
1538	MSTRG.14520.1_1	-1646.412239	734.225	-1648.082556	1	-1646.411886	841.2248	-3.340634	1	1	734.225	90
1539	MSTRG.14523.1_2	-498.36037	0.5608	-495.638746	0.3317	-489.641868	90.7563	5.443248	0.065767861	0.278152557	0.5608	15.76
1540	MSTRG.14526.1_1	-534.694993	0.3999	-529.499167	0.3622	-526.961885	5.6089	10.391652	0.005539639	0.036315791	0.3622	29.44
1541	MSTRG.14530.1_18	-449.605408	1.00E-04	-449.605314	0	-449.605278	0	0.000188	0.999906004	1	1.00E-04	29.44
1542	MSTRG.14535.1_1	-135.659106	2.3595	-135.659034	0	-135.659034	0	0.000144	0.999928003	1	2.3595	9.06
1543	MSTRG.14536.1_2	-442.21089	0.1644	-441.301301	0.2905	-441.301301	0.2905	1.819178	0.402689695	1	0.1644	90
1544	MSTRG.14537.1_3	-674.184641	2.0999	-674.184344	0	-674.184344	0	0.000594	0.999703044	1	2.0999	90
1545	MSTRG.1454.10_2	-512.341105	0.6099	-512.341105	0.6099	-512.341105	0.6099	0	1	1	0.6099	29.44
1546	MSTRG.14542.1_3	-393.691643	0.5813	-392.57465	0.5976	-389.624866	46.1154	2.233986	0.327262395	1	0.5813	29.44
1547	MSTRG.14544.1_2	-1907.610105	0.5078	-1902.325339	0.618	-1900.106082	13.3028	10.569532	0.005068218	0.0337164	0.618	6.65
1548	MSTRG.14554.1_2	-498.72562	0.7729	-496.365261	0.4372	-492.584296	6.8615	4.720718	0.094386332	0.37362627	0.7729	29.44
1549	MSTRG.14562.1_1	-248.650646	0.449	-245.287521	0.4518	-243.683965	2.8781	6.72625	0.034626881	0.164392204	0.449	29.44
1550	MSTRG.14570.2_11	-549.229881	2.0021	-549.442965	1	-546.266842	22.1101	-0.426168	1	1	2.0021	6.65
1551	MSTRG.14571.1_15	-1114.794438	0.0481	-1114.027621	0.4459	-1114.027613	0.4478	1.533634	0.464489187	1	0.0481	15.76
1552	MSTRG.14572.2_13	-2203.485502	1.0485	-2199.126317	0.5166	-2166.868181	51.5862	8.71837	0.012788806	0.072766863	0.5166	90
1553	MSTRG.14574.1_4	-1433.495548	0.1138	-1433.49555	0.1138	-1433.495548	0.1138	-4.00E-06	1	1	0.1138	90
1554	MSTRG.14586.1_4	-443.16832	999	-444.396947	1	-443.168734	951.7209	-2.457254	1	1	999	6.65
1555	MSTRG.14587.1_1	-3069.239101	0.6335	-3060.128405	0.7829	-3059.876764	0.9263	18.221392	0.000110478	0.001254513	0.7829	90
1556	MSTRG.14588.1_13	-662.826905	1.3236	-661.141237	0.5652	-644.932619	61.0045	3.371336	0.185320596	0.646406796	1.3236	6.65
1557	MSTRG.14594.16_8	-7964.693078	0.1933	-7964.693084	0.1933	-7964.693078	0.1933	-1.20E-05	1	1	0.1933	90
1558	MSTRG.14594.20_5	-7918.832283	0.0554	-7918.832284	0.0554	-7918.832658	0.0555	-2.00E-06	1	1	0.0554	90
1559	MSTRG.14594.22_3	-7666.65432	0.1856	-7666.33895	0.1985	-7666.338949	0.1985	0.63074	0.729518902	1	0.1856	90
1560	MSTRG.14605.1_12	-388.288776	0.3378	-388.288779	0.3379	-388.288776	0.3378	-6.00E-06	1	1	0.3378	6.65
1561	MSTRG.14606.3_1	-1436.007956	1.00E-04	-1436.00613	0	-1436.005934	0	0.003652	0.998175666	1	1.00E-04	90
1562	MSTRG.1461.1_2	-246.72706	999	-247.8016	1	-246.727126	951.4312	-2.14908	1	1	999	90
1563	MSTRG.14618.1_3	-2589.18299	0.4589	-2583.802151	0.5965	-2583.802151	0.5965	10.761678	0.004603958	0.031156981	0.5965	90
1564	MSTRG.1462.1_2	-405.779735	0.2513	-405.779736	0.2513	-405.779735	0.2513	-2.00E-06	1	1	0.2513	29.44
1565	MSTRG.14621.1_2	-673.690717	1.2438	-673.36864	0.6747	-668.973325	12.8502	0.644154	0.724642391	1	1.2438	9.06
1566	MSTRG.14622.1_8	-287.761734	2.1142	-287.761678	0	-287.761722	0.8861	0.000112	0.999944002	1	2.1142	6.65
1567	MSTRG.14624.4_5	-1664.829915	0.5752	-1645.64996	0.2279	-1599.865493	80.9333	38.35991	4.68E-09	1.59E-07	0.2279	90
1568	MSTRG.1463.1_6	-477.834326	3.5926	-478.768756	1	-477.834326	3.5926	-1.86886	1	1	3.5926	29.44
1569	MSTRG.14631.4_3	-1807.597358	0.3773	-1802.215581	0.2526	-1783.182022	14.3285	10.763554	0.004599641	0.031156981	0.2526	90
1570	MSTRG.14642.1_12	-2305.229903	0.5507	-2291.359813	0.2897	-2260.115936	5.8168	27.74018	9.47E-07	1.85E-05	0.2897	90
1571	MSTRG.1465.1_1	-157.208654	368.1196	-157.609766	1	-157.20866	400.8965	-0.802224	1	1	368.1196	29.44
1572	MSTRG.14650.1_1	-588.085477	0.5756	-585.799574	0.5328	-584.187464	1.2638	4.571806	0.101682202	0.397319353	0.5756	90
1573	MSTRG.14651.1_1	-625.002779	0.1043	-625.002809	0.1043	-625.002779	0.1043	-6.00E-05	1	1	0.1043	9.06
1574	MSTRG.14651.1_1	-625.002779	0.1043	-625.002809	0.1043	-625.002779	0.1043	-6.00E-05	1	1	0.1043	9.06
1575	MSTRG.14652.1_2	-604.036574	0.9221	-603.409013	0.6837	-600.294247	5.7996	1.255122	0.533892378	1	0.9221	29.44
1576	MSTRG.14658.1_4	-3537.23165	0.4568	-3537.231651	0.4568	-3537.23165	0.4568	-2.00E-06	1	1	0.4568	90
1577	MSTRG.14658.13_5	-3776.425399	0.3825	-3776.425401	0.3825	-3776.425399	0.3825	-4.00E-06	1	1	0.3825	90
1578	MSTRG.14658.17_3	-3886.771543	0.4508	-3886.771544	0.4508	-3886.771543	0.4508	-2.00E-06	1	1	0.4508	90
1579	MSTRG.14658.19_16	-1858.584364	1.9836	-1858.792234	1	-1858.584364	1.9836	-0.41574	1	1	1.9836	90
1580	MSTRG.14658.5_5	-4019.953881	0.3577	-4019.953883	0.3577	-4019.953881	0.3577	-4.00E-06	1	1	0.3577	90
1581	MSTRG.14659.1_2	-557.156939	1.1801	-557.026396	0.8757	-553.087424	60.6058	0.261086	0.877618755	1	1.1801	29.44
1582	MSTRG.14663.9_2	-739.477224	0.0899	-735.96162	0.6709	-735.961618	0.671	7.031208	0.029729841	0.144649213	0.0899	29.44
1583	MSTRG.14666.2_9	-1414.283072	0.351	-1414.281329	0.3511	-1414.281329	0.3511	0.003486	0.998258518	1	0.351	90
1584	MSTRG.14675.10_2	-3555.695852	0.5632	-3552.110644	0.4253	-3527.727974	12.8839	7.170416	0.027730899	0.137177092	0.5632	90
1585	MSTRG.14675.12_12	-1065.726688	0.5284	-1065.726688	0.5284	-1065.726688	0.5284	0	1	1	0.5284	90
1586	MSTRG.14675.5_5	-3394.543959	0.4911	-3391.152717	0.344	-3379.396637	32.9431	6.782484	0.033666837	0.160663643	0.4911	90
1587	MSTRG.14681.1_1	-521.606183	1.00E-04	-521.605305	0	-521.605211	0	0.001756	0.999122385	1	1.00E-04	90
1588	MSTRG.14683.2_7	-386.514031	1.2273	-386.529741	1	-386.514031	1.2273	-0.03142	1	1	1.2273	9.06
1589	MSTRG.14684.3_3	-986.24736	0.2	-986.247361	0.2	-986.24736	0.2	-2.00E-06	1	1	0.2	29.44
1590	MSTRG.14686.2_8	-2024.73583	0.006	-2024.239191	0.3075	-2024.239191	0.3075	0.993278	0.608572639	1	0.006	29.44
1591	MSTRG.14686.9_4	-1245.594781	1.6259	-1233.488798	0.4436	-1233.488798	0.4436	24.211966	5.53E-06	9.00E-05	0.4436	90
1592	MSTRG.1469.1_6	-4005.47134	0.0038	-4004.364547	0.2503	-4004.364547	0.2503	2.213586	0.330617553	1	0.0038	90
1593	MSTRG.1469.6_7	-3824.592831	0.0038	-3823.486097	0.2503	-3823.486097	0.2503	2.213468	0.33063706	1	0.0038	90
1594	MSTRG.14691.2_3	-823.585485	0.8123	-818.556782	0.2772	-790.448667	56.075	10.057406	0.006547297	0.041594014	0.2772	90
1595	MSTRG.14693.1_8	-9394.063902	0.0407	-9394.063936	0.0407	-9394.063902	0.0407	-6.80E-05	1	1	0.0407	90
1596	MSTRG.14693.7_4	-9211.359023	0.1606	-9204.201198	0.1072	-9190.313308	9.9255	14.31565	0.000778746	0.006824516	0.1072	90
1597	MSTRG.14695.1_24	-36759.96198	0.2739	-36754.34598	0.2492	-36726.15523	1.6038	11.232016	0.00363914	0.025585244	0.2492	90
1598	MSTRG.14695.42_24	-36595.32706	0.2477	-36595.32706	0.2477	-36595.32706	0.2477	-1.60E-05	1	1	0.2477	90
1599	MSTRG.14695.47_4	-36408.63104	0.1725	-36408.63105	0.1725	-36408.63104	0.1725	-4.00E-06	1	1	0.1725	90
1600	MSTRG.147.3_21	-2116.17816	0.5789	-2101.731277	0.3172	-2062.918025	172.4701	28.893766	5.32E-07	1.12E-05	0.3172	29.44
1601	MSTRG.14706.5_2	-570.541315	0.8764	-569.325793	0.5495	-561.628727	28.7035	2.431044	0.296555172	0.941420268	0.8764	90
1602	MSTRG.1471.5_1	-1233.865538	0.0089	-1233.862025	0.7787	-1233.862025	0.7787	0.007026	0.996493163	1	0.0089	90
1603	MSTRG.14711.2_1	-1750.167737	0.0586	-1750.16774	0.0586	-1750.167737	0.0586	-6.00E-06	1	1	0.0586	90
1604	MSTRG.14711.8_2	-564.014061	0.108	-561.794289	0.3724	-561.794289	0.3724	4.439544	0.108633875	0.41868275	0.108	6.65
1605	MSTRG.14712.1_16	-1104.615037	0.4897	-1100.327255	0.5279	-1099.534916	2.1126	8.575564	0.013735357	0.077238561	0.5279	29.44
1606	MSTRG.14713.1_1	-306.016524	180.8888	-306.446249	1	-306.012996	999	-0.85945	1	1	180.8888	6.65
1607	MSTRG.14716.19_8	-3587.181497	0.8386	-3587.1815	0.8397	-3587.181574	0.839	-6.00E-06	1	1	0.8386	90
1608	MSTRG.14718.7_11	-1086.57944	0.0033	-1083.401739	0.5661	-1083.40174	0.5666	6.355402	0.041681371	0.191148795	0.0033	90
1609	MSTRG.14720.1_3	-218.890058	0.5617	-217.219164	0.3991	-215.698569	1.3593	3.341788	0.188078848	0.653227389	0.5617	6.65
1610	MSTRG.14724.1_14	-582.592021	999	-584.40042	1	-582.592021	999	-3.616798	1	1	999	29.44
1611	MSTRG.14725.1_3	-273.032254	1.00E-04	-273.031683	0	-273.031623	0	0.001142	0.999429163	1	1.00E-04	29.44
1612	MSTRG.14737.6_4	-3296.894424	0.5087	-3267.871643	0.3183	-3214.11639	153.2644	58.045562	2.49E-13	2.02E-11	0.3183	90
1613	MSTRG.14739.1_2	-672.070075	1.089	-672.107807	1	-667.219449	103.2768	-0.075464	1	1	1.089	29.44
1614	MSTRG.14741.1_33	-1333.181698	0.8575	-1319.734303	0.63	-1308.140518	18.1471	26.89479	1.45E-06	2.69E-05	0.63	29.44
1615	MSTRG.14742.1_1	-530.183583	0.5333	-529.70326	0.6604	-529.70326	0.6604	0.960646	0.618583557	1	0.5333	90
1616	MSTRG.14743.4_6	-321.822466	0.4074	-321.822466	0.4074	-321.822466	0.4074	0	1	1	0.4074	29.44
1617	MSTRG.14753.1_6	-601.500905	0.7753	-600.853226	0.8262	-600.761553	1.0157	1.295358	0.523258852	1	0.7753	29.44
1618	MSTRG.14762.2_3	-876.053756	0.627	-876.053757	0.627	-876.053756	0.627	-2.00E-06	1	1	0.627	29.44
1619	MSTRG.14768.7_6	-1862.226753	2.1	-1862.2267	0.3472	-1862.226715	0.5294	0.000106	0.999947001	1	2.1	90
1620	MSTRG.14772.14_11	-12619.15103	0.1226	-12619.15105	0.1226	-12619.15103	0.1226	-4.20E-05	1	1	0.1226	90
1621	MSTRG.14781.1_3	-883.817427	0.8193	-880.208221	0.4413	-871.288679	11.72	7.218412	0.027073335	0.13441361	0.8193	15.76
1622	MSTRG.14784.1_12	-1102.987382	0.926	-1097.126093	0.4962	-1074.929725	163.435	11.722578	0.002847571	0.020815605	0.4962	90
1623	MSTRG.14785.3_4	-5459.126867	0.6623	-5439.663005	0.2681	-5367.133025	17.1653	38.927724	3.52E-09	1.24E-07	0.2681	90
1624	MSTRG.14787.2_5	-796.961215	0.095	-796.961217	0.095	-796.961215	0.095	-4.00E-06	1	1	0.095	90
1625	MSTRG.1479.1_3	-388.523126	0.1337	-387.394864	0.7534	-387.394858	0.7535	2.256524	0.323595176	1	0.1337	15.76
1626	MSTRG.14791.3_2	-1513.152365	0.7104	-1507.852347	0.3542	-1487.464208	35.6134	10.600036	0.004991504	0.033268831	0.3542	90
1627	MSTRG.14794.1_1	-376.754922	0.2008	-376.754944	0.2008	-376.754922	0.2008	-4.40E-05	1	1	0.2008	29.44
1628	MSTRG.1480.6_1	-1475.322951	1.00E-04	-1475.322593	0	-1475.322537	0	0.000716	0.999642064	1	1.00E-04	90
1629	MSTRG.14800.1_1	-1206.560365	1.258	-1202.849154	0.508	-1187.760678	218.5523	7.422422	0.024447899	0.123760541	1.258	6.65
1630	MSTRG.14805.1_1	-579.59996	0.0042	-579.423015	0.1397	-579.423015	0.1397	0.35389	0.837825864	1	0.0042	90
1631	MSTRG.14807.1_3	-445.265299	1.00E-04	-445.265184	0	-445.265166	0	0.00023	0.999885007	1	1.00E-04	29.44
1632	MSTRG.14809.1_5	-333.187163	0.5953	-333.11761	0.6434	-332.302759	48.5525	0.139106	0.932810693	1	0.5953	15.76
1633	MSTRG.14813.2_2	-2022.85461	0.0685	-2022.854611	0.0685	-2022.85461	0.0685	-2.00E-06	1	1	0.0685	90
1634	MSTRG.14818.6_3	-2294.42709	0.0688	-2294.427092	0.0688	-2294.42709	0.0688	-4.00E-06	1	1	0.0688	90
1635	MSTRG.14830.1_2	-274.019262	0.1149	-274.019267	0.1149	-274.019262	0.1149	-1.00E-05	1	1	0.1149	9.06
1636	MSTRG.14844.1_3	-299.159536	0.3863	-298.183748	0.4541	-298.045438	0.6842	1.951576	0.376895243	1	0.3863	29.44
1637	MSTRG.1485.2_2	-567.220119	0.6715	-559.422781	0.523	-552.908298	11.714	15.594676	0.000410827	0.003954071	0.523	29.44
1638	MSTRG.14853.1_8	-644.183788	0.387	-642.660258	0.5587	-642.660258	0.5587	3.04706	0.217941195	0.733462612	0.387	29.44
1639	MSTRG.14854.1_5	-459.160364	0.9716	-459.160364	0.9716	-459.160364	0.9716	0	1	1	0.9716	29.44
1640	MSTRG.14855.1_6	-427.007959	0.2919	-423.279566	0.2572	-421.942678	1.9994	7.456786	0.024031423	0.122061167	0.2919	90
1641	MSTRG.1486.53_2	-2637.542123	1.00E-04	-2637.542006	0	-2637.541987	0	0.000234	0.999883007	1	1.00E-04	90
1642	MSTRG.14862.1_3	-450.443173	0.8	-443.735116	0.5249	-441.178724	1.9523	13.416114	0.001221034	0.01014541	0.5249	29.44
1643	MSTRG.14873.1_2	-387.249801	1.4404	-387.466117	1	-385.616655	10.292	-0.432632	1	1	1.4404	29.44
1644	MSTRG.14894.1_10	-1926.853474	0.426	-1926.853475	0.4259	-1926.853474	0.426	-2.00E-06	1	1	0.426	90
1645	MSTRG.14905.6_3	-2516.651026	0.1845	-2516.651026	0.1845	-2516.651026	0.1845	0	1	1	0.1845	90
1646	MSTRG.14907.1_3	-367.884603	181.5093	-368.326099	1	-367.880911	998.9998	-0.882992	1	1	181.5093	29.44
1647	MSTRG.14911.2_1	-1373.802021	0.6934	-1362.899947	0.2784	-1338.314115	17.5353	21.804148	1.84E-05	0.000260827	0.2784	90
1648	MSTRG.14913.9_4	-240.014152	999	-240.424813	1	-240.014301	951.5554	-0.821322	1	1	999	90
1649	MSTRG.14917.14_2	-881.055523	0.8973	-881.055523	0.8974	-881.055523	0.8973	0	1	1	0.8973	90
1650	MSTRG.14929.1_18	-1174.494884	1.00E-04	-1174.494528	0	-1174.494469	0	0.000712	0.999644063	1	1.00E-04	90
1651	MSTRG.14933.2_4	-1981.266776	0.0066	-1980.375508	0.3746	-1980.375508	0.3746	1.782536	0.410135371	1	0.0066	90
1652	MSTRG.14934.1_1	-1049.430528	0.9302	-1048.296342	0.4399	-1046.145784	1.7303	2.268372	0.321683865	1	0.9302	90
1653	MSTRG.14938.1_3	-632.545118	0.9167	-631.527099	0.6778	-629.425208	43.3116	2.036038	0.361309987	1	0.9167	29.44
1654	MSTRG.14941.1_6	-543.627864	0.5679	-540.441965	0.2692	-529.053415	54.5251	6.371798	0.041341063	0.18971154	0.5679	29.44
1655	MSTRG.14951.3_1	-1032.145471	0.8101	-1027.99503	0.3917	-1004.207626	108.0382	8.300882	0.015757466	0.086514929	0.3917	15.76
1656	MSTRG.14955.3_3	-1603.937299	0.5507	-1565.059165	0.3963	-1543.500166	17.3937	77.756268	1.30E-17	2.11E-15	0.3963	90
1657	MSTRG.14958.3_2	-1239.253191	0.3835	-1236.84143	0.2216	-1229.417316	33.5611	4.823522	0.089657269	0.358576246	0.3835	90
1658	MSTRG.1496.1_3	-566.341789	2.5387	-566.771398	1	-566.341789	2.5387	-0.859218	1	1	2.5387	90
1659	MSTRG.14967.1_2	-1002.148754	0.0947	-999.33449	0.5039	-999.326246	0.8143	5.628528	0.059948825	0.25845066	0.0947	90
1660	MSTRG.14970.7_4	-3321.357587	1.1162	-3321.370399	1	-3321.358517	1.101	-0.025624	1	1	1.1162	90
1661	MSTRG.14972.1_4	-390.533781	2.0366	-390.533789	0.5638	-390.533764	27.6749	-1.60E-05	1	1	2.0366	15.76
1662	MSTRG.14972.3_1	-510.760382	0.0095	-507.709203	0.8452	-507.705806	0.8394	6.102358	0.047303121	0.21196728	0.0095	6.65
1663	MSTRG.14982.2_33	-1394.07792	0.1358	-1393.733586	0.43	-1393.733586	0.43	0.688668	0.708692185	1	0.1358	29.44
1664	MSTRG.14998.5_5	-2029.344509	1.1251	-2029.359388	1	-2029.344509	1.1251	-0.029758	1	1	1.1251	90
1665	MSTRG.15.8_38	-780.7991	2.5162	-781.263507	1	-777.126559	5.5232	-0.928814	1	1	2.5162	6.65
1666	MSTRG.150.1_5	-989.489351	0.5	-986.473636	0.4914	-981.058218	137.4166	6.03143	0.04901078	0.21786574	0.5	29.44
1667	MSTRG.15000.1_1	-748.386762	0.4831	-745.224032	0.6451	-740.159306	128.5363	6.32546	0.042310077	0.193403127	0.4831	6.65
1668	MSTRG.15005.1_3	-529.000079	1.2655	-524.109114	0.5294	-513.474036	6.8212	9.78193	0.007514168	0.046794884	0.5294	29.44
1669	MSTRG.15011.1_2	-352.625047	0.2707	-352.625048	0.2707	-352.625047	0.2707	-2.00E-06	1	1	0.2707	9.06
1670	MSTRG.15019.1_3	-400.999632	0.2784	-400.999634	0.2784	-400.999632	0.2784	-4.00E-06	1	1	0.2784	6.65
1671	MSTRG.15023.2_27	-652.171796	0.4969	-641.337351	0.3762	-632.59354	28.9073	21.66889	1.97E-05	0.000276852	0.3762	15.76
1672	MSTRG.15028.7_7	-457.002782	1.5127	-457.070435	1	-457.002782	1.5127	-0.135306	1	1	1.5127	9.06
1673	MSTRG.1503.1_4	-285.494471	999	-285.857075	1	-285.494607	951.7605	-0.725208	1	1	999	9.06
1674	MSTRG.15032.5_5	-410.222183	1.7732	-410.36443	1	-410.222183	1.7732	-0.284494	1	1	1.7732	90
1675	MSTRG.15046.1_2	-808.896293	0.8583	-806.154993	0.6661	-798.518476	165.2536	5.4826	0.06448646	0.273447502	0.8583	29.44
1676	MSTRG.15050.1_1	-658.796099	1.00E-04	-658.79573	0	-658.79569	0	0.000738	0.999631068	1	1.00E-04	90
1677	MSTRG.15051.1_2	-287.800701	999	-289.157182	1	-287.800701	999	-2.712962	1	1	999	29.44
1678	MSTRG.15055.1_4	-1479.267926	0.7078	-1474.521112	0.6323	-1466.151817	3.3793	9.493628	0.008679303	0.052898014	0.6323	29.44
1679	MSTRG.15056.1_1	-343.045735	1.6354	-343.498619	1	-343.045735	1.6354	-0.905768	1	1	1.6354	29.44
1680	MSTRG.15057.1_6	-318.724031	999	-319.59904	1	-318.724359	951.4498	-1.750018	1	1	999	6.65
1681	MSTRG.15059.1_1	-709.535836	1.0011	-708.625942	0.7763	-702.169512	53.5831	1.819788	0.402566894	1	1.0011	29.44
1682	MSTRG.15066.1_1	-357.453888	1.3127	-357.647608	1	-355.123529	3.3646	-0.38744	1	1	1.3127	6.65
1683	MSTRG.15074.1_2	-644.457349	0.9438	-643.487927	0.6919	-641.002125	1.3741	1.938844	0.379302211	1	0.9438	90
1684	MSTRG.15075.2_1	-981.719507	0.0083	-975.177427	0.7128	-973.994343	6.9595	13.08416	0.001441487	0.011674831	0.7128	29.44
1685	MSTRG.15077.1_1	-3088.036507	0.0038	-3085.428169	0.5477	-3085.428169	0.5477	5.216676	0.07365686	0.305316551	0.0038	29.44
1686	MSTRG.15078.1_5	-652.293345	1.3502	-652.458382	1	-652.20989	1.3984	-0.330074	1	1	1.3502	90
1687	MSTRG.15079.1_4	-556.450224	0.4335	-551.158982	0.496	-548.731249	122.8032	10.582484	0.005035502	0.033530391	0.496	29.44
1688	MSTRG.15080.1_4	-368.528147	0.6793	-366.756878	0.5016	-364.219243	65.0258	3.542538	0.170116973	0.602818186	0.6793	9.06
1689	MSTRG.15086.1_2	-489.791278	0.5467	-488.467753	0.5365	-487.438406	2.3392	2.64705	0.266195308	0.861591453	0.5467	29.44
1690	MSTRG.15097.1_2	-445.57369	665.3026	-446.463861	1	-445.57312	999	-1.780342	1	1	665.3026	29.44
1691	MSTRG.15107.1_2	-3009.710914	1.1552	-3009.73383	1	-3009.710914	1.1552	-0.045832	1	1	1.1552	90
1692	MSTRG.15107.3_7	-3318.359922	0.771	-3316.925741	0.535	-3307.471586	4.9537	2.868362	0.23831046	0.787235757	0.771	90
1693	MSTRG.15108.1_4	-2929.183508	0.7418	-2922.389511	0.6764	-2907.660694	34.9096	13.587994	0.001120481	0.009413733	0.6764	29.44
1694	MSTRG.15113.10_3	-516.867004	0.5593	-516.867188	0.5592	-516.867004	0.5593	-0.000368	1	1	0.5593	90
1695	MSTRG.15115.1_1	-235.584646	0.8601	-234.853011	0.533	-233.559959	1.3582	1.46327	0.481121713	1	0.8601	29.44
1696	MSTRG.15120.1_2	-381.364657	1.4736	-381.483966	1	-381.364657	1.4736	-0.238618	1	1	1.4736	29.44
1697	MSTRG.15122.1_1	-721.287278	0.6131	-719.551999	0.4155	-713.501933	15.1162	3.470558	0.176350991	0.621059635	0.6131	6.65
1698	MSTRG.15124.1_2	-529.102401	0.7777	-525.909543	0.6759	-522.449648	214.0994	6.385716	0.04105437	0.18864144	0.7777	29.44
1699	MSTRG.15129.4_2	-1138.673581	0.4832	-1128.619753	0.2411	-1111.956422	13.1073	20.107656	4.30E-05	0.000551475	0.2411	90
1700	MSTRG.15141.1_1	-1192.722318	0.5278	-1188.262751	0.2928	-1172.789703	85.8042	8.919134	0.011567371	0.067006498	0.2928	90
1701	MSTRG.15143.1_7	-415.395635	1.1532	-414.042025	0.7365	-412.054715	1.7835	2.70722	0.25830609	0.839811148	1.1532	29.44
1702	MSTRG.15145.1_6	-258.985567	2.1	-258.98546	0	-258.985545	0.5408	0.000214	0.999893006	1	2.1	29.44
1703	MSTRG.15145.3_8	-1219.232946	1.0361	-1212.975936	0.4517	-1167.483217	99.7616	12.51402	0.001916969	0.014947836	0.4517	29.44
1704	MSTRG.15149.1_3	-1034.310103	0.3043	-1034.310104	0.3043	-1034.310103	0.3043	-2.00E-06	1	1	0.3043	90
1705	MSTRG.15151.1_2	-406.755111	1.2041	-406.83358	1	-400.071803	145.0143	-0.156938	1	1	1.2041	29.44
1706	MSTRG.15154.1_1	-429.000296	0.3891	-427.519487	0.4812	-427.433982	0.6015	2.961618	0.227453604	0.75931529	0.3891	29.44
1707	MSTRG.15156.1_9	-459.861123	0.4337	-457.53181	0.5535	-457.506978	0.6248	4.658626	0.097362612	0.382987367	0.4337	90
1708	MSTRG.15165.1_5	-1071.417965	0.4933	-1059.331351	0.2404	-1038.050668	12.4901	24.173228	5.63E-06	9.13E-05	0.2404	29.44
1709	MSTRG.1518.3_1	-1370.029581	1.00E-04	-1370.028998	0	-1370.028933	0	0.001166	0.99941717	1	1.00E-04	90
1710	MSTRG.15187.32_1	-691.293709	0.3588	-686.45639	0.2577	-679.442738	97.9861	9.674638	0.007928281	0.048969476	0.2577	29.44
1711	MSTRG.15189.1_2	-501.82673	0.6878	-501.82673	0.6878	-501.82673	0.6878	0	1	1	0.6878	9.06
1712	MSTRG.15194.1_1	-390.469115	0.8289	-382.962273	0.5786	-379.459845	2.6558	15.013684	0.000549313	0.005085654	0.5786	29.44
1713	MSTRG.15196.1_6	-948.72503	0.0087	-947.891642	0.6245	-947.895705	0.6286	1.666776	0.434574451	1	0.0087	29.44
1714	MSTRG.15208.2_2	-2070.149521	0.639	-2035.612284	0.3577	-1980.658618	103.67	69.074474	1.00E-15	1.25E-13	0.3577	90
1715	MSTRG.15210.2_1	-1337.372545	0.809	-1313.097049	0.2726	-1266.03029	42.0045	48.550992	2.87E-11	1.57E-09	0.2726	90
1716	MSTRG.15211.2_22	-1019.018351	1.5285	-1018.20042	0.7205	-1008.218228	20.9777	1.635862	0.441343851	1	1.5285	90
1717	MSTRG.15213.1_3	-3152.166322	1.4035	-3152.177386	1	-3152.088533	1.4137	-0.022128	1	1	1.4035	90
1718	MSTRG.15215.8_5	-3860.665894	1.00E-04	-3860.664858	0	-3860.664743	0	0.002072	0.998964536	1	1.00E-04	90
1719	MSTRG.15218.2_2	-1528.424159	0.5214	-1512.720811	0.3357	-1471.402734	143.3005	31.406696	1.51E-07	3.63E-06	0.3357	90
1720	MSTRG.15218.4_1	-1219.666785	0.6491	-1219.215632	0.5398	-1218.419789	0.7164	0.902306	0.63689339	1	0.6491	90
1721	MSTRG.15220.1_5	-414.201677	1.00E-04	-414.201163	0	-414.201107	0	0.001028	0.999486132	1	1.00E-04	9.06
1722	MSTRG.15223.1_5	-1305.660486	0.0046	-1304.382431	0.3107	-1304.382431	0.3108	2.55611	0.278578609	0.894566954	0.0046	90
1723	MSTRG.15230.5_1	-2058.242407	0.0624	-2058.242409	0.0624	-2058.242407	0.0624	-4.00E-06	1	1	0.0624	90
1724	MSTRG.15231.8_6	-519.397672	0.7574	-517.176129	0.4866	-509.503539	217.2975	4.443086	0.108441654	0.418251727	0.7574	9.06
1725	MSTRG.15233.1_13	-430.850488	1.1304	-430.855488	1	-430.850488	1.1304	-0.01	1	1	1.1304	9.06
1726	MSTRG.15235.1_1	-588.576235	2.3628	-588.934301	1	-588.576235	2.3628	-0.716132	1	1	2.3628	90
1727	MSTRG.15237.1_1	-553.163337	0.9031	-541.128458	0.5552	-526.542294	425.9037	24.069758	5.93E-06	9.56E-05	0.5552	29.44
1728	MSTRG.1524.14_2	-6351.237318	0.1465	-6351.237321	0.1465	-6351.237318	0.1465	-6.00E-06	1	1	0.1465	90
1729	MSTRG.15242.5_2	-4511.248854	0.8414	-4506.474549	0.382	-4477.881112	31.6122	9.54861	0.008443951	0.051717364	0.382	90
1730	MSTRG.15245.1_13	-676.37224	0.0071	-675.387967	0.4882	-675.387967	0.4882	1.968546	0.373710816	1	0.0071	29.44
1731	MSTRG.15246.1_7	-1490.424178	0.196	-1490.424179	0.196	-1490.424178	0.196	-2.00E-06	1	1	0.196	90
1732	MSTRG.15248.1_4	-1285.985142	0.9674	-1280.469527	0.6532	-1269.498964	20.4051	11.03123	0.004023452	0.027852137	0.6532	29.44
1733	MSTRG.15250.2_38	-1437.441305	0.6564	-1433.341983	0.2998	-1409.88782	30.9255	8.198644	0.016583915	0.090072588	0.2998	90
1734	MSTRG.15252.1_8	-4269.887933	1.00E-04	-4269.885992	0	-4269.885637	0	0.003882	0.998060883	1	1.00E-04	90
1735	MSTRG.15259.1_2	-510.284783	999	-511.188317	1	-510.284783	999	-1.807068	1	1	999	29.44
1736	MSTRG.1526.1_1	-413.614204	0.5286	-409.953725	0.4135	-400.226796	201.3492	7.320958	0.02572019	0.129058495	0.5286	6.65
1737	MSTRG.15262.2_3	-376.358786	999	-377.183694	1	-376.358786	999	-1.649816	1	1	999	90
1738	MSTRG.15266.11_5	-3642.047397	0.1637	-3642.047398	0.1637	-3642.047422	0.1639	-2.00E-06	1	1	0.1637	90
1739	MSTRG.15266.17_5	-1778.857239	0.1966	-1778.088143	0.5326	-1778.088143	0.5326	1.538192	0.463431821	1	0.1966	90
1740	MSTRG.15266.20_2	-1933.878693	0.3636	-1928.936535	0.192	-1910.75671	9.6851	9.884316	0.007139175	0.044802508	0.192	90
1741	MSTRG.15267.1_1	-392.055974	0.3551	-386.566921	0.4884	-382.720515	91.5972	10.978106	0.004131755	0.028499276	0.4884	29.44
1742	MSTRG.15269.3_8	-5964.709035	0.5592	-5960.617991	0.4472	-5934.981225	12.3371	8.182088	0.016721767	0.090704866	0.4472	90
1743	MSTRG.15272.8_2	-1686.784185	0.3473	-1666.708702	0.1729	-1626.767848	53.2111	40.150966	1.91E-09	7.19E-08	0.1729	90
1744	MSTRG.15277.3_10	-532.742784	999	-533.810231	1	-532.74285	951.4394	-2.134894	1	1	999	29.44
1745	MSTRG.15278.1_2	-2792.042291	0.4835	-2750.696953	0.2483	-2672.590536	87.8688	82.690676	1.11E-18	2.21E-16	0.2483	90
1746	MSTRG.15283.2_6	-1392.37559	0.5849	-1381.258558	0.5052	-1364.367649	197.1788	22.234064	1.49E-05	0.000216611	0.5052	29.44
1747	MSTRG.15285.3_22	-989.543485	0.0121	-988.807862	0.5138	-988.807862	0.5138	1.471246	0.47920682	1	0.0121	29.44
1748	MSTRG.15287.5_2	-2019.012165	0.039	-2018.789253	0.2344	-2018.789253	0.2344	0.445824	0.800185262	1	0.039	90
1749	MSTRG.15288.1_9	-839.984505	0.5632	-838.710782	0.592	-831.983304	149.846	2.547446	0.27978803	0.897757586	0.5632	90
1750	MSTRG.15298.5_26	-575.86214	1.5251	-575.940358	1	-575.86214	1.5251	-0.156436	1	1	1.5251	29.44
1751	MSTRG.15299.1_2	-710.796525	0.5681	-699.692666	0.406	-690.127409	13.6932	22.207718	1.51E-05	0.000219181	0.406	29.44
1752	MSTRG.1530.1_1	-201.433079	2.0999	-201.433055	0	-201.433036	4.00E-04	4.80E-05	0.999976	1	2.0999	9.06
1753	MSTRG.15301.1_3	-1344.349829	999	-1344.557268	1	-1344.349841	951.4974	-0.414878	1	1	999	90
1754	MSTRG.15311.4_1	-441.683261	0.9283	-440.94758	0.7443	-440.18003	1.4126	1.471362	0.479179027	1	0.9283	29.44
1755	MSTRG.15315.1_2	-512.275685	0.5272	-508.556411	0.6322	-506.885242	3.0369	7.438548	0.024251568	0.122994179	0.5272	29.44
1756	MSTRG.15316.1_4	-276.542615	0.4547	-276.542616	0.4547	-276.542615	0.4547	-2.00E-06	1	1	0.4547	29.44
1757	MSTRG.15319.1_6	-895.176221	0.6632	-893.761977	0.6956	-893.625558	0.8468	2.828488	0.243109335	0.800214404	0.6632	29.44
1758	MSTRG.15322.1_6	-393.917711	2.9036	-394.492959	1	-393.917711	2.9036	-1.150496	1	1	2.9036	15.76
1759	MSTRG.15333.1_2	-1016.451582	0.6495	-1016.451584	0.6495	-1016.451582	0.6495	-4.00E-06	1	1	0.6495	29.44
1760	MSTRG.15334.6_2	-648.664043	0.0063	-648.529482	0.2623	-648.664043	0.0063	0.269122	0.874099557	1	0.0063	90
1761	MSTRG.15337.49_8	-2424.254161	1.00E-04	-2424.24795	0	-2424.247974	0	0.012422	0.993808248	1	1.00E-04	90
1762	MSTRG.15341.1_2	-2576.594672	0.5355	-2576.594681	0.5355	-2576.594672	0.5355	-1.80E-05	1	1	0.5355	90
1763	MSTRG.15342.1_2	-781.900244	1.8813	-782.084003	1	-781.900244	1.8813	-0.367518	1	1	1.8813	90
1764	MSTRG.15343.1_4	-533.775333	0.8568	-533.775333	0.8568	-533.775333	0.8568	0	1	1	0.8568	9.06
1765	MSTRG.15344.1_1	-341.202809	2.1001	-341.202811	1	-341.202811	0.8633	-4.00E-06	1	1	2.1001	15.76
1766	MSTRG.15350.1_2	-907.128477	0.1365	-905.313659	0.8068	-905.313659	0.8068	3.629636	0.162867548	0.581158398	0.1365	29.44
1767	MSTRG.15351.1_3	-821.597715	0.67	-813.276117	0.5794	-801.66673	108.4659	16.643196	0.000243207	0.002501236	0.5794	29.44
1768	MSTRG.15352.1_6	-308.673346	999	-309.324032	1	-308.673386	951.4515	-1.301372	1	1	999	29.44
1769	MSTRG.15356.1_1	-555.449284	1.2055	-555.474369	1	-552.713941	2.4525	-0.05017	1	1	1.2055	90
1770	MSTRG.15357.1_1	-330.876394	0.8266	-330.876394	0.8266	-330.876394	0.8266	0	1	1	0.8266	29.44
1771	MSTRG.15358.1_7	-557.246303	0.5589	-557.246303	0.5589	-557.246303	0.5589	0	1	1	0.5589	29.44
1772	MSTRG.15360.1_1	-322.660678	2.5098	-323.333332	0.7558	-317.033471	12.6031	-1.345308	1	1	2.5098	29.44
1773	MSTRG.15370.1_6	-473.319981	0.4159	-473.319981	0.4159	-473.319981	0.4159	0	1	1	0.4159	15.76
1774	MSTRG.15373.1_17	-650.970809	0.4549	-649.941137	0.5576	-649.172575	3.1029	2.059344	0.357124078	1	0.4549	29.44
1775	MSTRG.15374.1_3	-201.433104	1.00E-04	-201.433104	0	-201.433104	0	0	1	1	1.00E-04	15.76
1776	MSTRG.15376.1_2	-169.895254	1.1262	-169.899888	1	-169.895254	1.1262	-0.009268	1	1	1.1262	29.44
1777	MSTRG.15378.1_3	-379.441792	1.8622	-378.078209	0.7055	-372.367549	8.0984	2.727166	0.255742807	0.832985232	1.8622	9.06
1778	MSTRG.15379.1_2	-328.870343	1.00E-04	-328.870343	0	-328.870499	0.4305	0	1	1	1.00E-04	6.65
1779	MSTRG.15380.1_1	-370.849182	0.5126	-370.849187	0.5126	-370.849182	0.5126	-1.00E-05	1	1	0.5126	29.44
1780	MSTRG.15381.13_1	-349.424278	1.5275	-348.019735	0.1411	-348.019733	0.1411	2.809086	0.245479215	0.805758385	1.5275	90
1781	MSTRG.15383.1_4	-682.219126	0.9032	-671.336391	0.5075	-655.996405	27.0028	21.76547	1.88E-05	0.000265564	0.5075	29.44
1782	MSTRG.15387.12_4	-1138.338877	0.6791	-1127.635317	0.4511	-1106.058829	35.4968	21.40712	2.25E-05	0.000310617	0.4511	90
1783	MSTRG.15387.13_5	-719.753742	999	-721.079801	1	-719.754189	951.4351	-2.652118	1	1	999	90
1784	MSTRG.15390.12_51	-983.12459	0.4787	-979.456412	0.4673	-969.294239	118.3121	7.336356	0.02552293	0.128434251	0.4787	29.44
1785	MSTRG.15390.2_46	-983.12459	0.4787	-979.456412	0.4673	-969.294239	93.7628	7.336356	0.02552293	0.128434251	0.4787	29.44
1786	MSTRG.15399.1_3	-265.526115	999	-264.922544	0.4221	-261.691289	284.6761	1.207142	0.546855325	1	999	6.65
1787	MSTRG.154.1_7	-1216.68873	0.3314	-1210.878389	0.4908	-1210.199875	1.1456	11.620682	0.002996408	0.021760733	0.4908	29.44
1788	MSTRG.15400.11_5	-419.262333	0.7263	-419.262334	0.7263	-419.262333	0.7263	-2.00E-06	1	1	0.7263	6.65
1789	MSTRG.15401.1_5	-643.477158	1.1831	-643.49712	1	-643.477158	1.1831	-0.039924	1	1	1.1831	90
1790	MSTRG.15404.1_1	-336.581052	0.6541	-335.4542	0.3403	-331.766393	7.8577	2.253704	0.324051767	1	0.6541	15.76
1791	MSTRG.15408.1_10	-338.783686	999	-339.547267	1	-336.779447	67.3304	-1.527162	1	1	999	29.44
1792	MSTRG.15409.1_5	-533.835861	0.7912	-532.959223	0.6681	-532.215803	1.0149	1.753276	0.416179759	1	0.7912	6.65
1793	MSTRG.15409.1_5	-533.835861	0.7912	-532.959223	0.6681	-532.215803	1.0149	1.753276	0.416179759	1	0.7912	6.65
1794	MSTRG.15413.3_2	-554.350632	0.5743	-547.919783	0.5908	-541.263262	74.2247	12.861698	0.001611082	0.01281777	0.5908	29.44
1795	MSTRG.15415.1_13	-466.917935	0.2487	-466.917936	0.2487	-466.917935	0.2487	-2.00E-06	1	1	0.2487	90
1796	MSTRG.15416.1_1	-477.473162	1.0751	-477.475207	1	-477.473406	1.075	-0.00409	1	1	1.0751	9.06
1797	MSTRG.15418.1_2	-706.60962	0.485	-699.174037	0.5994	-695.727803	44.7389	14.871166	0.000589885	0.005397499	0.5994	29.44
1798	MSTRG.15419.1_1	-545.568498	0.0067	-545.330765	0.2916	-545.568513	0.0067	0.475466	0.788413169	1	0.0067	9.06
1799	MSTRG.1542.1_9	-501.118269	0.6789	-498.373934	0.6538	-497.068698	3.8802	5.48867	0.06429104	0.273077266	0.6789	29.44
1800	MSTRG.15420.2_1	-430.67432	0.8767	-426.835285	0.2964	-415.480872	9.7405	7.67807	0.021514353	0.111580321	0.8767	90
1801	MSTRG.15421.1_1	-272.855232	0.3443	-270.834833	0.3394	-267.945237	119.8666	4.040798	0.132602546	0.492746682	0.3443	29.44
1802	MSTRG.15423.1_1	-304.014728	0.626	-302.774728	0.5242	-302.32281	0.8346	2.48	0.289384218	0.922532117	0.626	29.44
1803	MSTRG.15424.1_1	-518.145357	1.1188	-508.543867	0.2567	-499.898859	7.8719	19.20298	6.76E-05	0.000813011	0.2567	29.44
1804	MSTRG.15428.1_2	-454.739184	0.6525	-448.203182	0.539	-444.546062	12.7716	13.072004	0.001450275	0.011741512	0.539	29.44
1805	MSTRG.15429.1_2	-365.938058	1.7154	-364.402292	0.5914	-353.980689	295.8441	3.071532	0.215290715	0.726275727	1.7154	29.44
1806	MSTRG.1543.1_2	-262.561032	0.4894	-261.641253	0.5879	-261.080749	59.6854	1.839558	0.398607124	1	0.4894	29.44
1807	MSTRG.15431.1_5	-459.46197	0.5129	-455.612442	0.4886	-451.062176	22.8689	7.699056	0.021289783	0.110578285	0.5129	29.44
1808	MSTRG.15433.15_3	-2940.106271	0.7345	-2912.522484	0.2733	-2839.155914	118.0777	55.167574	1.05E-12	7.54E-11	0.2733	90
1809	MSTRG.15433.20_3	-2967.228199	0.8208	-2955.889286	0.2974	-2903.806566	57.2613	22.677826	1.19E-05	0.000177796	0.2974	90
1810	MSTRG.15435.1_2	-342.057232	0.9499	-341.68232	0.504	-339.847973	2.3669	0.749824	0.687349763	1	0.9499	6.65
1811	MSTRG.15438.1_3	-532.261151	999	-532.555542	1	-532.261168	951.4304	-0.588782	1	1	999	90
1812	MSTRG.15441.6_18	-328.870558	2.1	-328.87054	0.2754	-328.870492	0	3.60E-05	0.999982	1	2.1	29.44
1813	MSTRG.15444.1_2	-472.852752	1.1832	-472.922349	1	-472.149383	3.598	-0.139194	1	1	1.1832	90
1814	MSTRG.15445.1_4	-526.733485	0.7111	-523.719742	0.4524	-513.990649	143.2652	6.027486	0.049107525	0.218249935	0.7111	29.44
1815	MSTRG.15449.1_12	-756.619327	0.2248	-753.025177	0.7942	-754.503022	0.5998	7.1883	0.027484035	0.136165048	0.2248	29.44
1816	MSTRG.15454.1_1	-262.757475	0.7391	-258.31167	0.5458	-254.66457	4.0887	8.89161	0.011727661	0.06780505	0.5458	29.44
1817	MSTRG.15455.1_3	-585.498726	0.7496	-585.003015	0.6925	-584.812377	0.8745	0.991422	0.609137656	1	0.7496	29.44
1818	MSTRG.15457.1_4	-234.908473	0.4442	-234.908474	0.4442	-234.908473	0.4442	-2.00E-06	1	1	0.4442	15.76
1819	MSTRG.15459.1_9	-641.573197	0.5228	-641.573372	0.5227	-641.573632	0.5244	-0.00035	1	1	0.5228	90
1820	MSTRG.15462.1_1	-325.798705	0.47	-324.533279	0.4872	-321.981896	40.7855	2.530852	0.282119088	0.903835375	0.47	29.44
1821	MSTRG.15465.1_1	-557.751916	0.9318	-556.752064	0.7145	-555.319395	1.5178	1.999704	0.367933891	1	0.9318	29.44
1822	MSTRG.15466.1_14	-4207.754699	0.288	-4194.256341	0.6216	-4194.256341	0.6216	26.996716	1.37E-06	2.57E-05	0.6216	90
1823	MSTRG.15467.1_6	-314.475501	0.4011	-314.475506	0.4011	-314.475501	0.4011	-1.00E-05	1	1	0.4011	90
1824	MSTRG.15468.1_1	-562.293287	0.7461	-561.942989	0.7357	-561.869911	0.8213	0.700596	0.704478124	1	0.7461	29.44
1825	MSTRG.15469.1_1	-410.630065	0.8456	-409.962166	0.6916	-409.115796	2.8244	1.335798	0.512784808	1	0.8456	29.44
1826	MSTRG.15476.1_3	-420.741475	0.3216	-417.090381	0.1811	-410.442062	54.6765	7.302188	0.02596271	0.129997901	0.3216	6.65
1827	MSTRG.15479.3_7	-650.291505	1.0965	-649.142388	0.6083	-646.432213	2.2864	2.298234	0.316916483	0.991623754	1.0965	29.44
1828	MSTRG.15479.4_4	-2116.884088	1.00E-04	-2116.868837	0	-2116.869029	0	0.030502	0.984864708	1	1.00E-04	90
1829	MSTRG.15479.9_3	-2233.904809	0.3656	-2222.380518	0.1576	-2196.595859	54.1805	23.048582	9.89E-06	0.000151236	0.1576	90
1830	MSTRG.15480.1_3	-242.424146	0.9704	-242.424146	0.9704	-242.424146	0.9704	0	1	1	0.9704	15.76
1831	MSTRG.15481.1_4	-417.243906	999	-417.501312	1	-417.243921	951.4301	-0.514812	1	1	999	29.44
1832	MSTRG.15486.1_4	-755.709113	0.7627	-752.045686	0.669	-747.189766	88.8115	7.326854	0.025644478	0.128732032	0.7627	9.06
1833	MSTRG.15487.1_2	-509.748733	2.1	-509.748726	0.1016	-509.748706	0	1.40E-05	0.999993	1	2.1	15.76
1834	MSTRG.15488.1_5	-296.645404	1.00E-04	-296.644958	0	-296.644912	0	0.000892	0.999554099	1	1.00E-04	29.44
1835	MSTRG.15489.1_7	-314.270829	999	-314.690597	1	-314.270979	951.4303	-0.839536	1	1	999	6.65
1836	MSTRG.15492.1_2	-309.198412	0.1921	-309.198413	0.1921	-309.198412	0.1921	-2.00E-06	1	1	0.1921	9.06
1837	MSTRG.15493.1_1	-167.168387	999	-167.558963	1	-167.168409	951.4303	-0.781152	1	1	999	29.44
1838	MSTRG.15494.1_2	-482.430874	0.6821	-482.430874	0.6821	-482.430874	0.6821	0	1	1	0.6821	9.06
1839	MSTRG.15495.1_2	-270.403209	0.6283	-270.403209	0.6283	-270.403209	0.6283	0	1	1	0.6283	90
1840	MSTRG.1550.6_3	-1202.975939	999	-1203.37888	1	-1202.976084	950.9995	-0.805882	1	1	999	90
1841	MSTRG.15506.5_5	-719.900974	1.2089	-719.033496	0.5488	-709.714087	44.2218	1.734956	0.420009479	1	1.2089	90
1842	MSTRG.15507.12_5	-5234.694119	0.137	-5234.694129	0.137	-5234.69791	0.138	-2.00E-05	1	1	0.137	90
1843	MSTRG.15507.16_4	-5122.047533	0.1348	-5122.047534	0.1348	-5122.047533	0.1348	-2.00E-06	1	1	0.1348	90
1844	MSTRG.15508.1_2	-3776.334921	0.688	-3729.427619	0.4767	-3663.589965	20.3116	93.814604	4.25E-21	1.27E-18	0.4767	29.44
1845	MSTRG.15517.1_6	-1288.292926	0.4184	-1282.76125	0.6073	-1282.76125	0.6073	11.063352	0.003959348	0.027462295	0.6073	9.06
1846	MSTRG.15519.1_2	-197.322333	2.0999	-197.322282	0.0318	-197.32225	0	0.000102	0.999949001	1	2.0999	9.06
1847	MSTRG.15519.1_2	-197.322333	2.0999	-197.322282	0.0318	-197.32225	0	0.000102	0.999949001	1	2.0999	9.06
1848	MSTRG.15520.1_4	-332.009195	0.5159	-332.009369	0.5159	-332.009195	0.516	-0.000348	1	1	0.5159	9.06
1849	MSTRG.15520.1_4	-332.009195	0.5159	-332.009369	0.5159	-332.009195	0.516	-0.000348	1	1	0.5159	9.06
1850	MSTRG.15522.1_8	-417.926063	0.4303	-416.9755	0.4536	-415.997999	1.5531	1.901126	0.38652335	1	0.4303	29.44
1851	MSTRG.15522.1_8	-417.926063	0.4303	-416.9755	0.4536	-415.997999	1.5531	1.901126	0.38652335	1	0.4303	29.44
1852	MSTRG.15522.4_7	-4146.152855	0.0737	-4146.152857	0.0737	-4146.152855	0.0737	-4.00E-06	1	1	0.0737	90
1853	MSTRG.15523.1_2	-578.686897	1.0278	-578.687626	1	-578.686897	1.0278	-0.001458	1	1	1.0278	29.44
1854	MSTRG.15523.1_2	-578.686897	1.0278	-578.687626	1	-578.686897	1.0278	-0.001458	1	1	1.0278	29.44
1855	MSTRG.15524.1_2	-254.874569	2.0998	-254.87439	0	-254.87439	0	0.000358	0.999821016	1	2.0998	9.06
1856	MSTRG.15530.5_5	-711.181179	1.6865	-703.21222	0.8431	-703.21222	0.8431	15.937918	0.000346039	0.003414392	0.8431	29.44
1857	MSTRG.15532.3_4	-4276.096947	0.008	-4273.617335	0.3846	-4273.617335	0.3846	4.959224	0.083775724	0.339711606	0.008	90
1858	MSTRG.15533.5_6	-4350.648772	0.8667	-4350.509583	0.8108	-4349.535926	1.0688	0.278378	0.870063571	1	0.8667	90
1859	MSTRG.15533.7_6	-4350.648772	0.8667	-4350.509583	0.8108	-4349.535926	1.0688	0.278378	0.870063571	1	0.8667	90
1860	MSTRG.15534.29_19	-476.588857	0.9122	-474.706396	0.3916	-461.576914	63.4833	3.764922	0.152215043	0.550822655	0.9122	90
1861	MSTRG.15534.29_19	-476.588857	0.9122	-474.706396	0.3916	-461.576914	63.4833	3.764922	0.152215043	0.550822655	0.9122	90
1862	MSTRG.15534.5_8	-2448.538104	0.7508	-2438.624164	0.435	-2394.674067	111.0126	19.82788	4.95E-05	0.000619013	0.435	90
1863	MSTRG.15537.5_1	-1157.073128	1.00E-04	-1157.073022	0	-1157.072994	0	0.000212	0.999894006	1	1.00E-04	90
1864	MSTRG.15542.12_7	-836.73295	1.00E-04	-836.732843	0	-836.732825	0	0.000214	0.999893006	1	1.00E-04	90
1865	MSTRG.15543.1_4	-1870.975389	0.5673	-1866.999175	0.3309	-1848.510967	16.0565	7.952428	0.018756517	0.099596918	0.3309	90
1866	MSTRG.15543.21_1	-1360.297705	0.6988	-1337.044651	0.3261	-1292.15614	34.8435	46.506108	7.97E-11	3.98E-09	0.3261	90
1867	MSTRG.15543.8_4	-2944.153715	0.104	-2942.678164	0.3449	-2942.678164	0.3449	2.951102	0.228652705	0.76211564	0.104	90
1868	MSTRG.15543.9_3	-2782.130238	0.183	-2774.763604	0.6566	-2774.509219	10.0453	14.733268	0.000631992	0.005720919	0.6566	90
1869	MSTRG.15544.1_2	-541.24093	0.4296	-541.079704	0.4712	-541.079704	0.4712	0.322452	0.851099701	1	0.4296	90
1870	MSTRG.15546.1_1	-243.985914	0.554	-242.560095	0.4911	-242.175279	0.7574	2.851638	0.240311567	0.792608545	0.554	29.44
1871	MSTRG.15549.6_3	-1049.665004	0.1834	-1049.665004	0.1834	-1049.665004	0.1834	0	1	1	0.1834	90
1872	MSTRG.1555.1_1	-164.435276	2.1	-164.43528	0.7126	-164.435278	1.0002	-8.00E-06	1	1	2.1	29.44
1873	MSTRG.15559.5_3	-409.033584	999	-409.48091	1	-409.033741	951.5601	-0.894652	1	1	999	15.76
1874	MSTRG.15560.1_2	-152.442096	1.00E-04	-152.441593	0	-152.441542	0	0.001006	0.999497126	1	1.00E-04	6.65
1875	MSTRG.15561.1_1	-607.851649	0.4883	-603.030331	0.613	-601.504607	14.3464	9.642636	0.008056162	0.04961517	0.613	29.44
1876	MSTRG.15563.1_3	-596.639969	0.9434	-594.306305	0.6324	-589.054576	34.7788	4.667328	0.096939908	0.381608439	0.9434	29.44
1877	MSTRG.15564.10_1	-1545.869779	0.5695	-1540.162487	0.2789	-1527.825317	156.4926	11.414584	0.003321655	0.023663733	0.2789	29.44
1878	MSTRG.15571.1_2	-152.102624	2.1	-152.102623	1	-152.102622	0.5914	2.00E-06	0.999999	1	2.1	29.44
1879	MSTRG.15571.1_2	-152.102624	2.1	-152.102623	1	-152.102622	0.5914	2.00E-06	0.999999	1	2.1	29.44
1880	MSTRG.15574.1_1	-579.430367	0.4865	-578.230955	0.5779	-577.471906	28.9716	2.398824	0.301371366	0.954132184	0.4865	29.44
1881	MSTRG.15577.1_6	-646.250034	0.342	-643.469624	0.4402	-642.411994	1.9995	5.56082	0.062013077	0.265725469	0.342	90
1882	MSTRG.15578.1_4	-989.186632	0.9009	-985.626608	0.764	-975.264882	27.8863	7.120048	0.028438142	0.139681657	0.9009	29.44
1883	MSTRG.15579.1_2	-620.872626	0.8491	-613.279005	0.3164	-589.37753	140.1736	15.187242	0.000503654	0.004716601	0.3164	90
1884	MSTRG.15584.1_2	-279.960492	999	-282.002269	1	-279.960492	999	-4.083554	1	1	999	15.76
1885	MSTRG.15585.30_16	-1201.630527	0.11	-1201.630529	0.11	-1201.630527	0.11	-4.00E-06	1	1	0.11	90
1886	MSTRG.15588.10_6	-4571.57911	0.5081	-4552.076327	0.2004	-4476.356374	31.2082	39.005566	3.39E-09	1.19E-07	0.2004	90
1887	MSTRG.15588.7_2	-438.60835	0.824	-438.60835	0.824	-438.60835	0.824	0	1	1	0.824	90
1888	MSTRG.15591.1_2	-578.686897	1.0278	-578.687626	1	-578.686897	1.0278	-0.001458	1	1	1.0278	29.44
1889	MSTRG.15591.1_2	-578.686897	1.0278	-578.687626	1	-578.686897	1.0278	-0.001458	1	1	1.0278	29.44
1890	MSTRG.15592.1_4	-1179.326707	0.8079	-1179.326707	0.8079	-1179.326707	0.8079	0	1	1	0.8079	6.65
1891	MSTRG.15592.1_4	-1179.326707	0.8079	-1179.326707	0.8079	-1179.326707	0.8079	0	1	1	0.8079	6.65
1892	MSTRG.15596.2_11	-723.009666	0.8053	-716.390228	0.6305	-703.981728	494.6093	13.238876	0.001334181	0.01094825	0.6305	29.44
1893	MSTRG.15596.4_5	-1945.247192	0.0782	-1945.247194	0.0782	-1945.247192	0.0782	-4.00E-06	1	1	0.0782	90
1894	MSTRG.15598.1_1	-747.065666	0.6055	-739.564786	0.7478	-734.828468	65.8415	15.00176	0.000552598	0.00510856	0.7478	15.76
1895	MSTRG.15598.1_1	-747.065666	0.6055	-739.564786	0.7478	-734.828468	65.8415	15.00176	0.000552598	0.00510856	0.7478	15.76
1896	MSTRG.1560.1_3	-528.738505	0.6853	-522.164739	0.572	-515.80626	237.62	13.147532	0.001396528	0.011376031	0.572	29.44
1897	MSTRG.15600.1_3	-705.271817	0.8786	-697.939384	0.5395	-684.516663	436.7492	14.664866	0.000653981	0.00588221	0.5395	90
1898	MSTRG.15600.1_3	-705.271817	0.8786	-697.939384	0.5395	-684.516663	436.7492	14.664866	0.000653981	0.00588221	0.5395	90
1899	MSTRG.15601.1_1	-690.626809	1.2464	-676.46478	0.6691	-680.510397	0.0081	28.324058	7.07E-07	1.44E-05	0.6691	90
1900	MSTRG.15601.3_7	-1886.891098	1.7942	-1862.408959	0.6034	-1862.203104	1.236	48.964278	2.33E-11	1.30E-09	0.6034	90
1901	MSTRG.15604.1_1	-336.525367	2.6934	-335.606716	0.5019	-317.790734	143.5836	1.837302	0.399057006	1	2.6934	90
1902	MSTRG.15604.1_1	-336.525367	2.6934	-335.606716	0.5019	-317.790734	143.5836	1.837302	0.399057006	1	2.6934	90
1903	MSTRG.15606.2_2	-683.857789	0.641	-674.047283	0.3623	-661.050152	13.8569	19.621012	5.49E-05	0.000674111	0.3623	90
1904	MSTRG.15606.2_2	-683.857789	0.641	-674.047283	0.3623	-661.050152	13.8569	19.621012	5.49E-05	0.000674111	0.3623	90
1905	MSTRG.15611.1_3	-1072.894854	0.1086	-1072.825485	0.3389	-1072.825485	0.3389	0.138738	0.932982346	1	0.1086	29.44
1906	MSTRG.15612.1_1	-575.522341	1.3873	-569.925055	0.7171	-569.759158	0.7817	11.194572	0.003707913	0.026000314	0.7171	29.44
1907	MSTRG.15613.3_4	-3558.822819	0.5043	-3540.636624	0.2045	-3490.035113	16.8355	36.37239	1.26E-08	3.99E-07	0.2045	90
1908	MSTRG.15616.4_1	-1105.356455	1.00E-04	-1105.356233	0	-1105.356197	0	0.000444	0.999778025	1	1.00E-04	90
1909	MSTRG.15620.10_1	-131.855709	1.00E-04	-131.855564	0	-131.855544	0	0.00029	0.999855011	1	1.00E-04	6.65
1910	MSTRG.15620.10_1	-131.855709	1.00E-04	-131.855564	0	-131.855544	0	0.00029	0.999855011	1	1.00E-04	6.65
1911	MSTRG.15620.10_1	-131.855709	1.00E-04	-131.855564	0	-131.855544	0	0.00029	0.999855011	1	1.00E-04	6.65
1912	MSTRG.15620.10_1	-131.855709	1.00E-04	-131.855564	0	-131.855544	0	0.00029	0.999855011	1	1.00E-04	6.65
1913	MSTRG.15620.2_5	-5642.80591	0.8016	-5628.352387	0.3378	-5563.966197	16.6436	28.907046	5.28E-07	1.11E-05	0.3378	90
1914	MSTRG.15621.4_2	-3525.791962	0.6422	-3522.875061	0.4554	-3511.119637	61.4127	5.833802	0.054101087	0.237149835	0.6422	90
1915	MSTRG.15621.4_2	-3525.791962	0.6422	-3522.875061	0.4554	-3511.119637	61.4127	5.833802	0.054101087	0.237149835	0.6422	90
1916	MSTRG.15622.1_1	-253.857271	0.5963	-248.967458	0.3559	-239.366144	211.7759	9.779626	0.007522829	0.046821256	0.3559	29.44
1917	MSTRG.15622.1_1	-253.857271	0.5963	-248.967458	0.3559	-239.366144	211.7759	9.779626	0.007522829	0.046821256	0.3559	29.44
1918	MSTRG.15623.2_1	-833.369227	0.0078	-833.232249	0.3459	-833.369227	0.0078	0.273956	0.87198941	1	0.0078	90
1919	MSTRG.15623.2_1	-833.369227	0.0078	-833.232249	0.3459	-833.369227	0.0078	0.273956	0.87198941	1	0.0078	90
1920	MSTRG.15625.2_11	-1219.375663	1.9865	-1219.803325	1	-1218.276015	2.282	-0.855324	1	1	1.9865	90
1921	MSTRG.15625.7_6	-2638.291741	0.6011	-2601.153325	0.5792	-2586.009856	20.1716	74.276832	7.43E-17	1.06E-14	0.5792	90
1922	MSTRG.15631.1_2	-1549.604937	0.4161	-1549.604937	0.4161	-1549.604937	0.4161	0	1	1	0.4161	90
1923	MSTRG.15634.4_3	-1471.192831	0.6822	-1452.972255	0.4246	-1410.982074	253.0212	36.441152	1.22E-08	3.86E-07	0.4246	90
1924	MSTRG.15636.1_5	-887.898632	1.3242	-887.929109	1	-887.898632	1.3242	-0.060954	1	1	1.3242	29.44
1925	MSTRG.15639.1_5	-1300.027041	0.1814	-1299.458864	0.2125	-1299.458864	0.2125	1.136354	0.566557332	1	0.1814	90
1926	MSTRG.15649.1_4	-461.075154	0.7887	-461.075154	0.7887	-461.075154	0.7887	0	1	1	0.7887	6.65
1927	MSTRG.15653.1_1	-193.209662	0.33	-192.498434	0.3533	-191.551457	2.845	1.422456	0.491040829	1	0.33	15.76
1928	MSTRG.15653.1_1	-193.209662	0.33	-192.498434	0.3533	-191.551457	2.845	1.422456	0.491040829	1	0.33	15.76
1929	MSTRG.15653.1_1	-193.209662	0.33	-192.498434	0.3533	-191.551457	2.845	1.422456	0.491040829	1	0.33	15.76
1930	MSTRG.15658.19_3	-340.270393	0.4962	-340.270393	0.4962	-340.270571	0.4961	0	1	1	0.4962	90
1931	MSTRG.15658.19_3	-340.270393	0.4962	-340.270393	0.4962	-340.270571	0.4961	0	1	1	0.4962	90
1932	MSTRG.15662.5_8	-3457.246456	2.1	-3457.246478	1	-3457.246476	1.0697	-4.40E-05	1	1	2.1	90
1933	MSTRG.15664.1_6	-366.79125	0.4029	-365.711567	0.404	-363.524298	18.0832	2.159366	0.339703194	1	0.4029	29.44
1934	MSTRG.15680.18_8	-5334.294785	0.0608	-5333.660763	0.0576	-5329.297841	1.0246	1.268044	0.530454019	1	0.0608	90
1935	MSTRG.15686.1_4	-152.10263	2.1	-152.102627	0.6958	-152.102597	0	6.00E-06	0.999997	1	2.1	6.65
1936	MSTRG.15691.1_1	-370.217407	1.3819	-368.14519	0.5747	-357.055493	61.4364	4.144434	0.125906338	0.472511722	1.3819	6.65
1937	MSTRG.15695.10_20	-18079.53185	0.2456	-18079.53185	0.2456	-18079.53185	0.2456	-2.00E-06	1	1	0.2456	90
1938	MSTRG.15695.4_22	-19041.94595	0.1984	-19041.94595	0.1984	-19041.94595	0.1984	-2.00E-06	1	1	0.1984	90
1939	MSTRG.15695.8_9	-19068.74159	0.3867	-19058.8489	0.1995	-19006.9478	6.2562	19.785382	5.05E-05	0.000630443	0.1995	90
1940	MSTRG.15698.1_2	-226.191775	0.2687	-226.191777	0.2687	-226.191775	0.2687	-4.00E-06	1	1	0.2687	29.44
1941	MSTRG.15699.1_4	-193.21145	185.9204	-193.21145	0.3948	-193.21145	1.6796	0	1	1	185.9204	29.44
1942	MSTRG.157.1_25	-1914.586327	0.637	-1893.573494	0.5074	-1872.956925	13.1993	42.025666	7.49E-10	3.10E-08	0.5074	90
1943	MSTRG.15700.2_4	-1411.443807	0.1878	-1411.443807	0.1878	-1411.443807	0.1878	0	1	1	0.1878	90
1944	MSTRG.15700.3_2	-1216.242431	1.1529	-1214.835425	0.4163	-1201.385304	29.6329	2.814012	0.244875343	0.804275406	1.1529	90
1945	MSTRG.15706.24_2	-3730.120677	0.0095	-3725.979958	0.5483	-3725.979958	0.5483	8.281438	0.015911407	0.087090768	0.5483	90
1946	MSTRG.15714.1_2	-172.657012	2.0999	-172.656919	0	-172.656919	0	0.000186	0.999907004	1	2.0999	6.65
1947	MSTRG.15718.1_1	-820.239985	1.00E-04	-820.239866	0	-820.239851	0	0.000238	0.999881007	1	1.00E-04	90
1948	MSTRG.15724.1_3	-391.983454	0.4643	-386.250015	0.5529	-385.769413	2.6652	11.466878	0.00323593	0.023134874	0.5529	29.44
1949	MSTRG.15736.1_1	-1856.206126	0.4352	-1856.206126	0.4352	-1856.206126	0.4352	0	1	1	0.4352	90
1950	MSTRG.1574.15_4	-3654.641586	0.4462	-3648.770402	0.1521	-3631.003874	2.0634	11.742368	0.002819533	0.020660624	0.1521	90
1951	MSTRG.15745.1_1	-537.481576	0.7401	-533.036858	0.6311	-531.121807	1.5901	8.889436	0.011740416	0.067860248	0.6311	29.44
1952	MSTRG.15746.1_1	-271.714814	0.4482	-269.431679	0.31	-264.435468	130.6758	4.56627	0.101964048	0.398053042	0.4482	29.44
1953	MSTRG.15747.1_2	-273.774421	0.523	-273.774421	0.523	-273.774421	0.523	0	1	1	0.523	29.44
1954	MSTRG.1575.1_11	-827.947225	0.7533	-825.745434	0.6599	-824.073163	2.0799	4.403582	0.110604888	0.425271973	0.7533	29.44
1955	MSTRG.15750.1_1	-354.741607	0.2095	-343.68498	0.2937	-340.290893	52.2286	22.113254	1.58E-05	0.000227899	0.2937	29.44
1956	MSTRG.1576.1_1	-395.770767	0.1884	-394.361258	0.6148	-394.354637	3.1165	2.819018	0.244263187	0.803137662	0.1884	29.44
1957	MSTRG.15766.7_3	-4521.846411	0.6382	-4517.096627	0.1946	-4497.097065	5.8805	9.499568	0.008653564	0.052802466	0.1946	90
1958	MSTRG.15769.5_4	-1338.878622	0.3853	-1338.878622	0.3853	-1338.878622	0.3853	0	1	1	0.3853	90
1959	MSTRG.15773.1_2	-1659.468225	1.00E-04	-1659.468113	0	-1659.468087	0	0.000224	0.999888006	1	1.00E-04	90
1960	MSTRG.15774.1_2	-505.601685	1.0757	-505.603452	1	-505.601685	1.0757	-0.003534	1	1	1.0757	9.06
1961	MSTRG.15775.1_7	-1244.047687	0.4924	-1243.096804	0.8133	-1243.096804	0.8133	1.901766	0.386399682	1	0.4924	90
1962	MSTRG.15776.9_7	-3078.647634	0.0565	-3078.018491	0.054	-3075.171924	0.2092	1.258286	0.533048428	1	0.0565	90
1963	MSTRG.15783.1_3	-912.920617	0.705	-910.934898	0.5421	-907.854408	7.1111	3.971438	0.137281873	0.50622242	0.705	6.65
1964	MSTRG.15793.4_1	-433.835915	0.2814	-433.022477	0.5544	-433.022477	0.5544	1.626876	0.44333127	1	0.2814	90
1965	MSTRG.15794.1_3	-572.992626	0.309	-572.992626	0.309	-572.992626	0.309	0	1	1	0.309	15.76
1966	MSTRG.15796.1_6	-391.950708	1.00E-04	-391.95059	0	-391.950572	0	0.000236	0.999882007	1	1.00E-04	29.44
1967	MSTRG.15798.1_2	-200.017932	0.8379	-199.122171	0.5076	-196.884142	3.299	1.791522	0.408296767	1	0.8379	29.44
1968	MSTRG.158.1_4	-2045.935027	0.739	-2045.676458	0.7999	-2045.676458	0.7999	0.517138	0.77215575	1	0.739	90
1969	MSTRG.1580.24_3	-2860.989804	0.4058	-2860.597848	0.3039	-2856.960175	1.4495	0.783912	0.675733846	1	0.4058	90
1970	MSTRG.15801.1_11	-5701.286272	0.1524	-5701.286273	0.1524	-5701.286272	0.1524	-2.00E-06	1	1	0.1524	90
1971	MSTRG.15802.1_2	-339.922512	999	-340.106612	1	-339.922522	951.4298	-0.3682	1	1	999	29.44
1972	MSTRG.15803.1_1	-297.742632	999	-298.159957	1	-297.742785	951.4232	-0.83465	1	1	999	29.44
1973	MSTRG.15817.1_1	-169.349101	0.2827	-169.349103	0.2827	-169.349101	0.2827	-4.00E-06	1	1	0.2827	29.44
1974	MSTRG.15819.1_3	-516.737805	1.0948	-515.370318	0.7097	-512.575292	2.1848	2.734974	0.254746333	0.830634815	1.0948	29.44
1975	MSTRG.15820.1_6	-578.267048	0.6065	-572.620202	0.628	-568.296224	43.2228	11.293692	0.003528629	0.024915933	0.628	29.44
1976	MSTRG.15821.1_5	-721.44433	1.0828	-703.156661	0.4211	-674.044522	361.7818	36.575338	1.14E-08	3.64E-07	0.4211	90
1977	MSTRG.15822.2_1	-312.336511	0.586	-312.336511	0.586	-312.336511	0.586	0	1	1	0.586	90
1978	MSTRG.15823.11_6	-2149.019001	0.7431	-2123.731561	0.4455	-2078.393549	26.3365	50.57488	1.04E-11	6.33E-10	0.4455	15.76
1979	MSTRG.15823.2_4	-2520.419941	0.4716	-2507.779929	0.1712	-2475.639349	25.1321	25.280024	3.24E-06	5.60E-05	0.1712	90
1980	MSTRG.15823.8_14	-2355.069578	0.0637	-2355.068482	0.0649	-2355.068482	0.0649	0.002192	0.9989046	1	0.0637	90
1981	MSTRG.15832.3_4	-2593.21996	0.268	-2592.645069	0.5713	-2592.645069	0.5713	1.149782	0.562766207	1	0.268	90
1982	MSTRG.15832.6_4	-4890.540754	0.2873	-4878.077291	0.1665	-4845.341901	33.0036	24.926926	3.87E-06	6.55E-05	0.1665	90
1983	MSTRG.15835.1_2	-410.108297	2.1305	-410.379604	1	-410.108297	2.1305	-0.542614	1	1	2.1305	6.65
1984	MSTRG.15837.1_1	-398.993041	0.6076	-397.574369	0.5512	-396.971808	2.0106	2.837344	0.242035226	0.797423332	0.6076	29.44
1985	MSTRG.1584.1_6	-641.296677	2.4471	-641.296646	0.3298	-641.296607	0	6.20E-05	0.999969	1	2.4471	29.44
1986	MSTRG.15851.1_1	-585.677905	0.5444	-583.229607	0.527	-581.296126	64.7605	4.896596	0.086440583	0.348314388	0.5444	29.44
1987	MSTRG.15852.1_2	-268.738679	999	-269.194858	1	-268.738846	950.148	-0.912358	1	1	999	29.44
1988	MSTRG.15853.1_10	-532.821718	0.7402	-530.705564	0.6525	-530.036988	0.9396	4.232308	0.120494159	0.455915533	0.7402	29.44
1989	MSTRG.15857.3_13	-16113.17869	0.0146	-16113.1787	0.0146	-16113.17876	0.0146	-1.00E-05	1	1	0.0146	90
1990	MSTRG.15857.4_5	-15921.21153	0.0596	-15921.21213	0.0596	-15921.21208	0.0596	-0.00119	1	1	0.0596	90
1991	MSTRG.15867.1_3	-470.349475	0.8021	-470.349475	0.8021	-470.349475	0.8021	0	1	1	0.8021	29.44
1992	MSTRG.15867.3_2	-744.68096	1.0743	-744.684501	1	-744.68096	1.0743	-0.007082	1	1	1.0743	90
1993	MSTRG.1587.3_1	-1467.124833	0.6757	-1464.551236	0.5221	-1456.937066	116.2565	5.147194	0.076260742	0.313992991	0.6757	90
1994	MSTRG.15873.10_18	-1117.207927	999	-1118.501472	1	-1117.208005	951.4969	-2.58709	1	1	999	90
1995	MSTRG.15876.1_6	-673.707423	0.7325	-672.787745	0.714	-669.885199	53.1891	1.839356	0.398647385	1	0.7325	29.44
1996	MSTRG.15879.10_14	-1151.627672	0.3921	-1150.573759	0.4963	-1150.57378	0.496	2.107826	0.348571118	1	0.3921	90
1997	MSTRG.15881.1_2	-518.566424	1.3426	-518.764427	1	-517.954225	7.8571	-0.396006	1	1	1.3426	29.44
1998	MSTRG.15885.3_5	-2255.378505	0.5386	-2237.269285	0.2449	-2185.576735	66.2148	36.21844	1.37E-08	4.22E-07	0.2449	90
1999	MSTRG.15888.2_3	-1125.950405	0.1113	-1125.950407	0.1113	-1125.950405	0.1113	-4.00E-06	1	1	0.1113	90
[truncated: 19,156 more rows]
