# Supplementary material for: Stochastic Gain and Loss of Novel Transcribed Open Reading Frames in the Human Lineage
Source: Oxford University Press journal article supplement (doi:10.1093/gbe/evaa194), 2020-09-14
Supplement: evaa194_supplementary_data.zip [file evaa194_supplementary_data.zip › dowling-supplementary-material-1.pdf]

# Supplementary material for Stochastic gain and loss of novel transcribed open reading frames in the human lineage

Daniel Dowling, Johnathan Schmitz, and Erich Bornberg-Bauer

September 2, 2020

## Contents

|           |                                                                  |           |
|-----------|------------------------------------------------------------------|-----------|
| <b>1</b>  | <b>Data sets used</b>                                            | <b>2</b>  |
| 1.1       | RNAseq, Riboseq, and Mass spectrometry data used . . . . .       | 2         |
| 1.2       | Genome and GFF data used . . . . .                               | 3         |
| 1.3       | Total read counts for transcriptomic data sets used . . . . .    | 3         |
| <b>2</b>  | <b>ORFs identified</b>                                           | <b>5</b>  |
| <b>3</b>  | <b>Statistical tests</b>                                         | <b>5</b>  |
| 3.1       | ORF sequence properties . . . . .                                | 5         |
| 3.2       | Selection analysis . . . . .                                     | 6         |
| <b>4</b>  | <b>Repetitive elements found in human ORFs</b>                   | <b>7</b>  |
| 4.1       | Repetitive elements found in human ORFs . . . . .                | 7         |
| <b>5</b>  | <b>Primate specific ORFs with proteomics evidence</b>            | <b>8</b>  |
| 5.1       | Great apes with mass spectrometry evidence for translation . . . | 8         |
| <b>6</b>  | <b>Re-analysis of sequences</b>                                  | <b>9</b>  |
| <b>7</b>  | <b>GC-content of transcribed ORFs</b>                            | <b>12</b> |
| <b>8</b>  | <b>Sequence identity of transcribed ORF homologs</b>             | <b>13</b> |
| <b>9</b>  | <b>Expression of novel ORFs</b>                                  | <b>14</b> |
| <b>10</b> | <b>Analyses of new sequence properties</b>                       | <b>17</b> |

# 1 Data sets used

## 1.1 RNAseq, Riboseq, and Mass spectrometry data used

Table S1: Transcriptomic and proteomic data sets used

| species                | datatype          | identifiers                                                                                                                                                                                                     | reference |
|------------------------|-------------------|-----------------------------------------------------------------------------------------------------------------------------------------------------------------------------------------------------------------|-----------|
| <i>Homo sapiens</i>    | RNAseq            | SRR306840, SRX081984, SRR306845, SRX081989, SRR306848, SRX081991, SRR306852, SRR306854, SRR306855, SRR306840, SRX081984, SRR306845, SRX081989, SRR306848, SRX081991, SRR306852, SRR306854, SRR306855, SRR306858 | [1]       |
| <i>Pan troglodytes</i> | RNAseq            | SRR306812, SRR306818, SRR306824, SRR306825, SRR306822, SRR306820                                                                                                                                                | [1]       |
| <i>Pan paniscus</i>    | RNAseq            | RR306828, SRR306830, SRR306836, SRR306834, SRR306832, SRR306837                                                                                                                                                 | [1]       |
| <i>Gorilla gorilla</i> | RNAseq            | RR306801, SRR306803, SRR306809, SRR306810, SRR306805, SRR306807                                                                                                                                                 | [1]       |
| <i>Pongo pygmaeus</i>  | RNAseq            | SRR306792, SRR306793, SRR306795, SRR306799, SRR306797                                                                                                                                                           | [1]       |
| <i>Macaca mulatta</i>  | RNAseq            | SRR306778, SRR306781, SRR306783, SRR306785, SRR306787, SRR306788                                                                                                                                                | [1]       |
| <i>Mus musculus</i>    | RNAseq            | RR306761, SRR306760, SRR306759, SRR306758, SRR306764, SRR306767, SRR306770, SRR306773, SRR306775, SRR306789                                                                                                     | [1]       |
| <i>Homo sapiens</i>    | Riboseq           | Battle15_All_ribocov_track                                                                                                                                                                                      | [2]       |
| <i>Homo sapiens</i>    | RNAseq            | Battle15_All_mrnacov_track                                                                                                                                                                                      | [2]       |
| <i>Homo sapiens</i>    | Mass-spectrometry | PXD011817                                                                                                                                                                                                       | [3]       |
| <i>Homo sapiens</i>    | Mass-spectrometry | PXD001572                                                                                                                                                                                                       | [4]       |

## 1.2 Genome and GFF data used

Table S2: Genome and GFF files used for assembling transcriptomes

| species                | data type | source                                          |
|------------------------|-----------|-------------------------------------------------|
| <i>Homo sapiens</i>    | GFF       | GCF_000001405.37_GRCh38.p11_genomic.gff.gz      |
| <i>Homo sapiens</i>    | genome    | GCF_000001405.37_GRCh38.p11_genomic.fna.gz      |
| <i>Pan troglodytes</i> | GFF       | GCF_000001515.7_Pan_tro.3.0_genomic.gff.gz      |
| <i>Pan troglodytes</i> | genome    | GCF_000001515.7_Pan_tro.3.0_genomic.fna.gz      |
| <i>Pan paniscus</i>    | GFF       | GCF_000258655.2_panpan1.1_genomic.gff.gz        |
| <i>Pan paniscus</i>    | genome    | GCF_000258655.2_panpan1.1_genomic.fna.gz        |
| <i>Gorilla gorilla</i> | GFF       | GCF_000151905.2_gorGor4_genomic.gff.gz          |
| <i>Gorilla gorilla</i> | genome    | GCF_000151905.2_gorGor4_genomic.fna.gz          |
| <i>Pongo pygmaeus</i>  | GFF       | GCF_000001545.4_P_pygmaeus.2.0.2_genomic.gff.gz |
| <i>Pongo pygmaeus</i>  | genome    | GCF_000001545.4_P_pygmaeus.2.0.2_genomic.fna.gz |
| <i>Macaca mulatta</i>  | GFF       | GCF_000772875.2_Mmul.8.0.1_genomic.gff.gz       |
| <i>Macaca mulatta</i>  | genome    | GCF_000772875.2_Mmul.8.0.1_genomic.fna.gz       |
| <i>Mus musculus</i>    | GFF       | GCF_000001635.26_GRCm38.p6_genomic.gff.gz       |
| <i>Mus musculus</i>    | genome    | GCF_000001635.26_GRCm38.p6_genomic.fna.gz       |

## 1.3 Total read counts for transcriptomic data sets used

Table S3: Read counts for transcriptomes

| species                | brain    | cerebellum | testes   | heart    | liver    | kidney   |
|------------------------|----------|------------|----------|----------|----------|----------|
| <i>Homo sapiens</i>    | 44795322 | 37635232   | 33068033 | 30936565 | 32922167 | 21926014 |
| <i>Pan troglodytes</i> | 27273899 | 19900399   | 26364419 | 45840208 | 18043692 | 36411794 |
| <i>Pan paniscus</i>    | 37206658 | 32941383   | 15536191 | 24925667 | 19075280 | 25534408 |
| <i>Gorilla gorilla</i> | 32611328 | 19090764   | 21236012 | 32269972 | 36337882 | 29542949 |
| <i>Pongo pygmaeus</i>  | 33527031 | 20085444   | -        | 32239994 | 35506723 | 27472342 |
| <i>Macaca mulatta</i>  | 18281486 | 19055736   | 21720133 | 20137441 | 31782210 | 22145222 |
| <i>Mus musculus</i>    | 65943582 | 20799622   | 16660610 | 26376762 | 16274055 | 23768384 |

Table S4: Mapped read counts for transcriptomes

| species                | brain    | cerebellum | testes   | heart    | liver    | kidney   | total     |
|------------------------|----------|------------|----------|----------|----------|----------|-----------|
| <i>Homo sapiens</i>    | 28578072 | 28956571   | 25575196 | 23373069 | 26593621 | 16642917 | 129719446 |
| <i>Pan troglodytes</i> | 23229971 | 15319772   | 18484822 | 32599034 | 14053939 | 31171210 | 134858748 |
| <i>Pan paniscus</i>    | 18763106 | 15485844   | 8107037  | 8025950  | 8855145  | 10770673 | 70007755  |
| <i>Gorilla gorilla</i> | 28072348 | 14933934   | 16194892 | 26312358 | 30352140 | 24568505 | 140434177 |
| <i>Pongo pygmaeus</i>  | 24452145 | 14561503   | -        | 19122614 | 26837837 | 20188269 | 105162368 |
| <i>Macaca mulatta</i>  | 13288615 | 14888764   | 14629340 | 14711442 | 24266373 | 13802011 | 95586545  |
| <i>Mus musculus</i>    | 55795533 | 14036330   | 13930205 | 19342816 | 13646773 | 17955868 | 134707525 |

## 2 ORFs identified

ORFs were assigned one of eight annotation statuses based on their proximity to annotated genes. These are 0 (intergenic ORF), 1 (close to gene), 2 (close to gene on opposite strand), 3 (intonic ORF), 4 (intronic ORF on opposite strand), 5 overlap with exon (out of frame), 6 overlap with exon (out of form and on opposite strand), and 7 overlap with exon (in frame).

Table S5: Number of ORFs identified using BLASTp at each conservation class and annotation status

| Conservation level | total | annotation status |     |     |      |      |     |     |       |
|--------------------|-------|-------------------|-----|-----|------|------|-----|-----|-------|
|                    |       | 0                 | 1   | 2   | 3    | 4    | 5   | 6   | 7     |
| 0                  | 4429  | 1512              | 226 | 229 | 1158 | 1225 | 43  | 15  | 19    |
| 1                  | 1048  | 312               | 67  | 78  | 246  | 299  | 25  | 11  | 10    |
| 2                  | 1283  | 412               | 87  | 97  | 294  | 333  | 30  | 16  | 14    |
| 3                  | 1559  | 502               | 99  | 127 | 366  | 371  | 52  | 22  | 20    |
| 4                  | 4836  | 1491              | 300 | 327 | 1017 | 1184 | 309 | 88  | 120   |
| 5                  | 16596 | 872               | 98  | 95  | 419  | 425  | 627 | 600 | 13460 |

## 3 Statistical tests

### 3.1 ORF sequence properties

Table S6: Statistical tests used. In each test the youngest ORF (conservation class 0) were compared to the oldest ORFs (conservation class 5)

| Features                 | Mann Whitney U-test |           | Cohen's D  |
|--------------------------|---------------------|-----------|------------|
|                          | W                   | P         | D          |
| ISD intergenic           | 755120              | 3.145e-09 | 0.2429161  |
| ISD intronic             | 261730              | 0.01665   | 0.1270498  |
| ISD exon overlap         | 10464000            | 0.0001934 | 0.2519427  |
| Aggregation intergenic   | 637770              | 0.1782    | 0.06616157 |
| Aggregation intronic     | 229680              | 0.0993    | 0.00485418 |
| Aggregation exon overlap | 9603500             | 0.1294    | 0.3158485  |
| ORF length intergenic    | 1089400             | 2.2e-16   | 1.020863   |
| ORF length intronic      | 393190              | 2.2e-16   | 1.202443   |
| ORF length exon overlap  | 19119000            | 2.2e-16   | 0.9654509  |
| GC-content intergenic    | 690610              | 0.05245   | 0.1166842  |
| GC-content intronic      | 247350              | 0.5518    | 0.05137238 |
| GC-content exon overlap  | 12790000            | 2.2e-16   | 0.5693152  |

## 3.2 Selection analysis

Table S7: Results of chi square tests to determine if the proportion of sequences below omega threshold differed between different conservation levels.

| conservation | n     | omega | df | chi square | Yates correction | p value  |
|--------------|-------|-------|----|------------|------------------|----------|
| 1 and 5      | 15452 | <0.5  | 1  | 848.3271   | 846.2846         | <0.00001 |
| 1 and 5      | 15452 | <0.25 | 1  | 432.8146   | 431.4745         | <0.00001 |
| 2 and 5      | 15052 | <0.5  | 1  | 492.8775   | 490.8951         | <0.00001 |
| 2 and 5      | 15052 | <0.25 | 1  | 297.7561   | 296.3583         | <0.00001 |
| 3 and 5      | 15319 | <0.5  | 1  | 666.9086   | 664.9682         | <0.00001 |
| 3 and 5      | 15319 | <0.25 | 1  | 410.2197   | 408.8289         | <0.00001 |
| 4 and 5      | 18577 | <0.5  | 1  | 2529.5564  | 2527.7201        | <0.00001 |
| 4 and 5      | 18577 | <0.25 | 1  | 1960.6516  | 1959.0624        | <0.00001 |

## 4 Repetitive elements found in human ORFs

### 4.1 Repetitive elements found in human ORFs

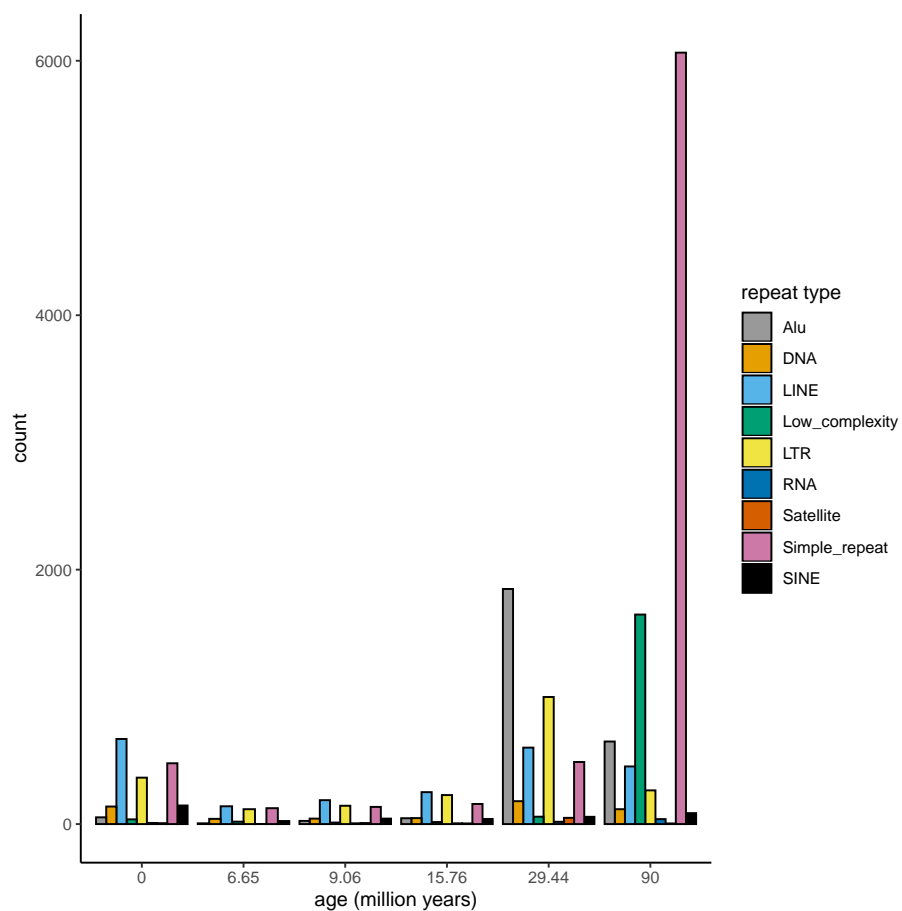

Figure S1: Repetitive elements identified in human ORFs. Age corresponds to the age of the ORF based on identifying homologous sequences transcribed in other primate taxa. SINE refers to non alu-element SINEs.

## 5 Primate specific ORFs with proteomics evidence

### 5.1 Great apes with mass spectrometry evidence for translation

Table S8: great-ape specific ORFs with mass spectrometry evidence

| ORF ID           | Minimum<br>Age (MY) | reference |
|------------------|---------------------|-----------|
| MSTRG.26607.1_2  | 0.00                | [5]       |
| MSTRG.26607.2_2  | 0.00                | [5]       |
| MSTRG.37003.1_1  | 0.00                | [5]       |
| MSTRG.9310.5_2   | 6.65                | [5]       |
| MSTRG.14698.17_2 | 9.06                | [5]       |
| MSTRG.19945.1_5  | 9.06                | [5]       |
| rna106715_4      | 9.06                | [5]       |
| MSTRG.17291.1_2  | 15.76               | [5]       |
| MSTRG.18707.1_1  | 15.76               | [5]       |
| MSTRG.19700.1_2  | 15.76               | [5]       |
| MSTRG.20318.13_1 | 15.76               | [5]       |
| MSTRG.29103.4_17 | 15.76               | [5]       |
| MSTRG.29865.1_1  | 15.76               | [5]       |
| MSTRG.31316.11_7 | 15.76               | [5]       |
| MSTRG.32504.1_2  | 15.76               | [5]       |
| MSTRG.33748.5_15 | 15.76               | [5]       |
| MSTRG.33754.1_3  | 15.76               | [5]       |
| MSTRG.39770.1_2  | 15.76               | [5]       |
| MSTRG.5.4_15     | 15.76               | [5]       |
| rna77466_7       | 15.76               | [5]       |
| MSTRG.20868.1_2  | 0.00                | [3]       |
| MSTRG.28027.1_9  | 0.00                | [3]       |
| MSTRG.32964.10_3 | 0.00                | [3]       |
| MSTRG.38646.1_9  | 0.00                | [3]       |
| MSTRG.39718.1_10 | 15.76               | [3]       |

## 6 Re-analysis of sequences

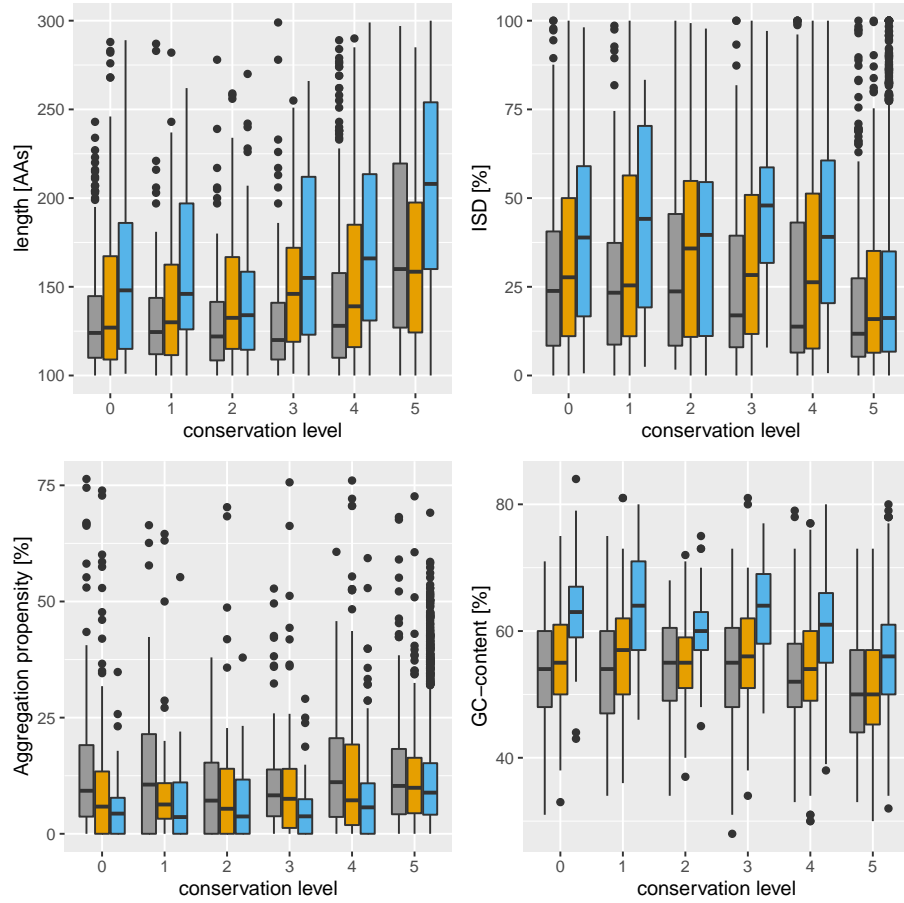

Figure S2: **Sequence properties of transcribed human ORFs.** Only ORFs with lengths between 100 and 300 amino-acids were used in this plot. a.) ORF length. b.) Intrinsic structural disorder (ISD). c.) Aggregation propensity. d.) GC-content. Coloured boxes show ORFs which overlap with intergenic regions (grey), introns (yellow), and exon overlap (blue).

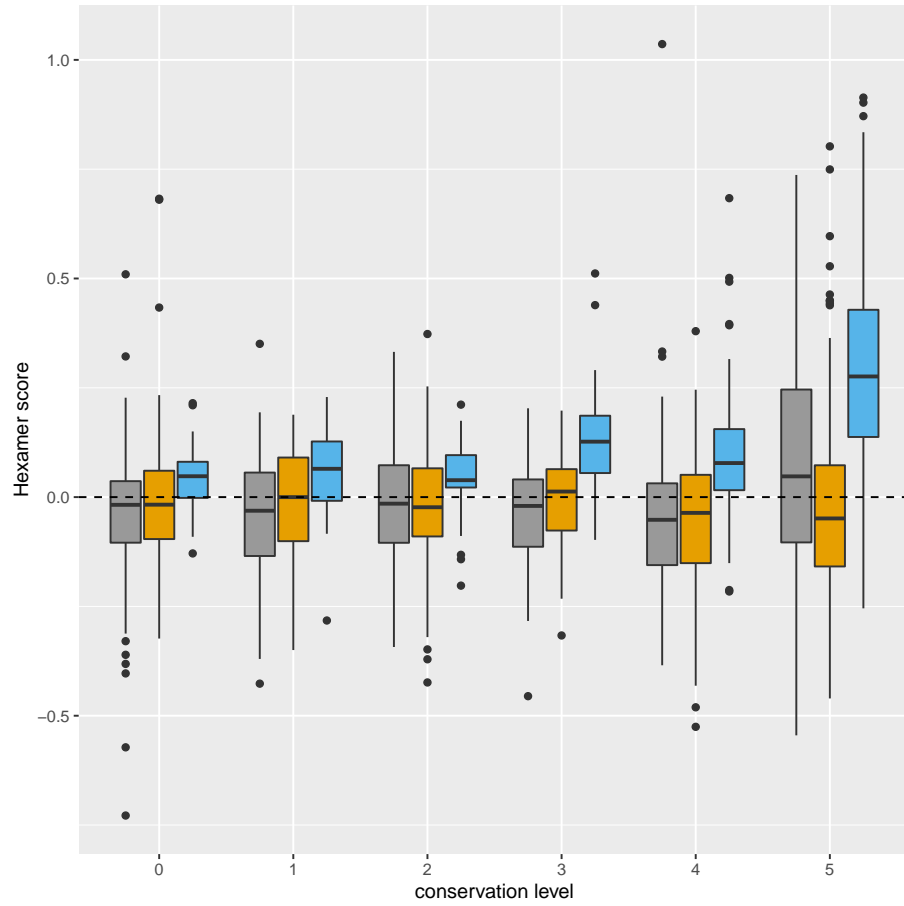

Figure S3: **Hexamer score of transcribed ORFs.** Only ORFs with lengths between 100 and 300 amino-acids were used in this plot. Grey boxed show ORFs overlap intergenic regions, yellow boxes overlap introns, and blue boxes overlap exons. Values greater than 0 (marked with a dotted line) indicate coding sequences, values below 0 indicate non-coding.

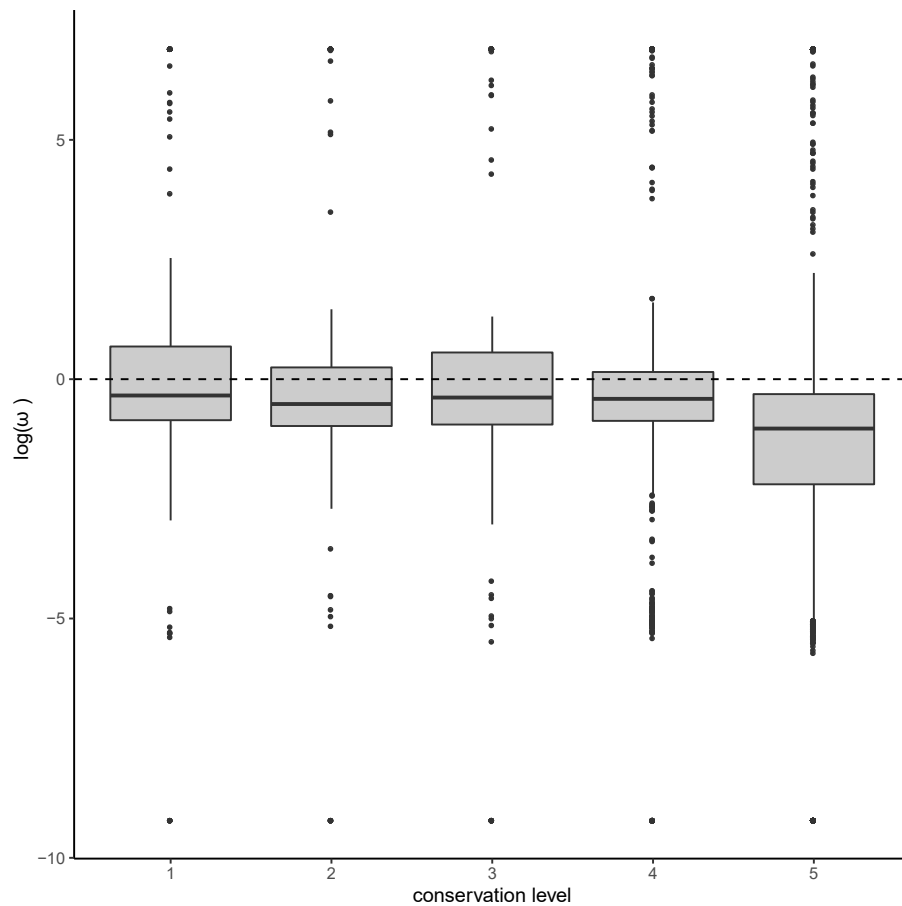

Figure S4: **dN/dS ( $\omega$ ) values of transcribed ORFs.** Only ORFs with lengths between 100 and 300 amino-acids were used in this plot. Dotted line indicates omega of 1, values below 1 are likely to evolving under purifying selection.

## 7 GC-content of transcribed ORFs

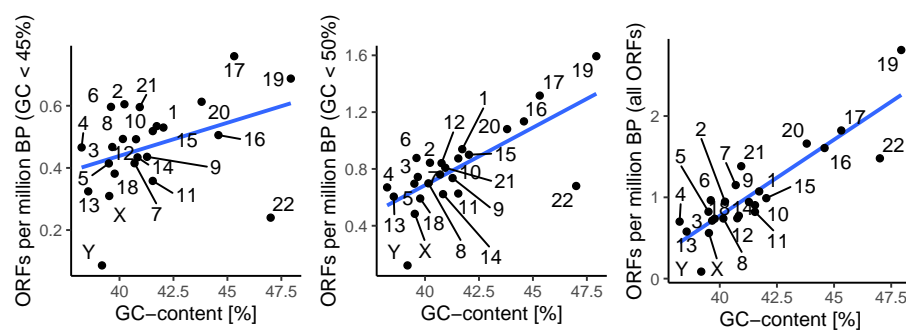

Figure S5: **Correlation between number of ORFs per chromosome and chromosome GC content.** From left to right, ORFs below 45% GC, below 50%, all ORFs.

## 8 Sequence identity of transcribed ORF homologs

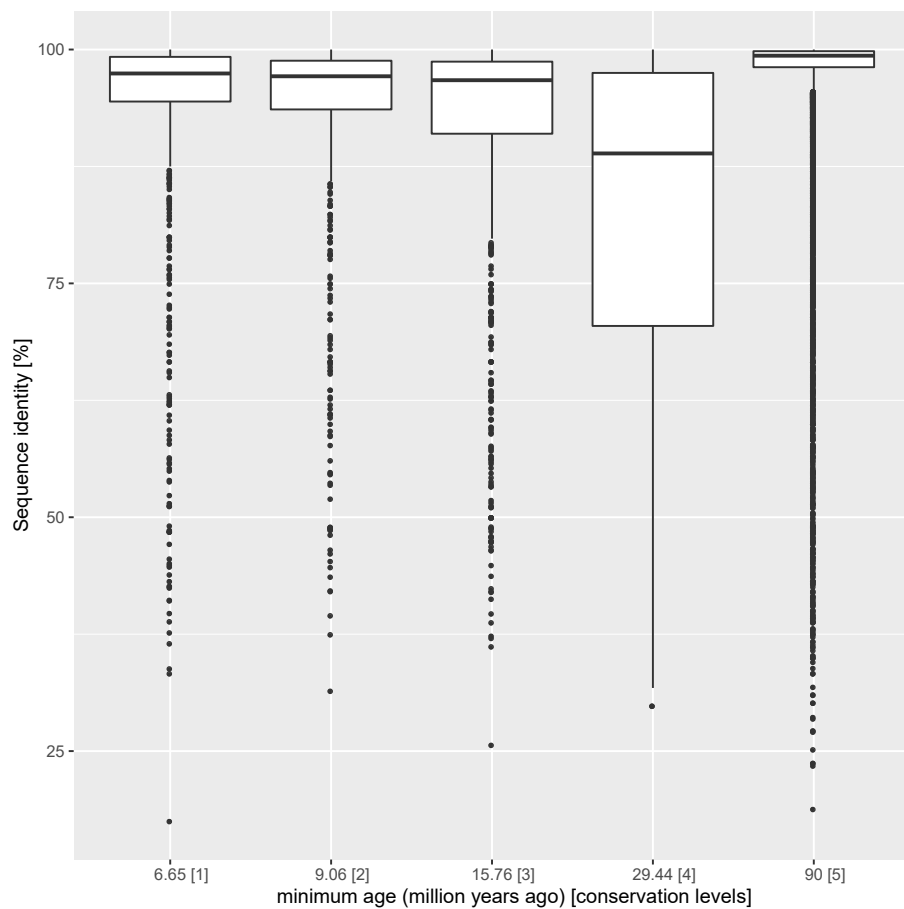

Figure S6: **Sequence identity [%] between human and chimpanzee homologs assigned to different age categories.** Conservation level shown in square brackets.

## 9 Expression of novel ORFs

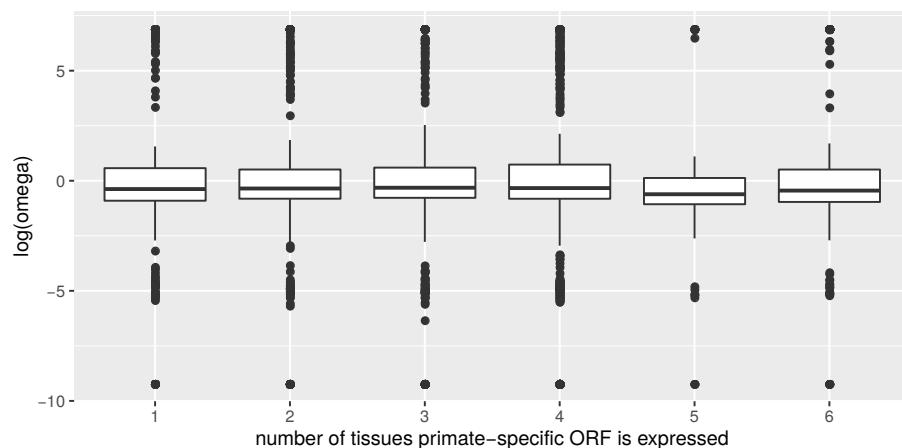

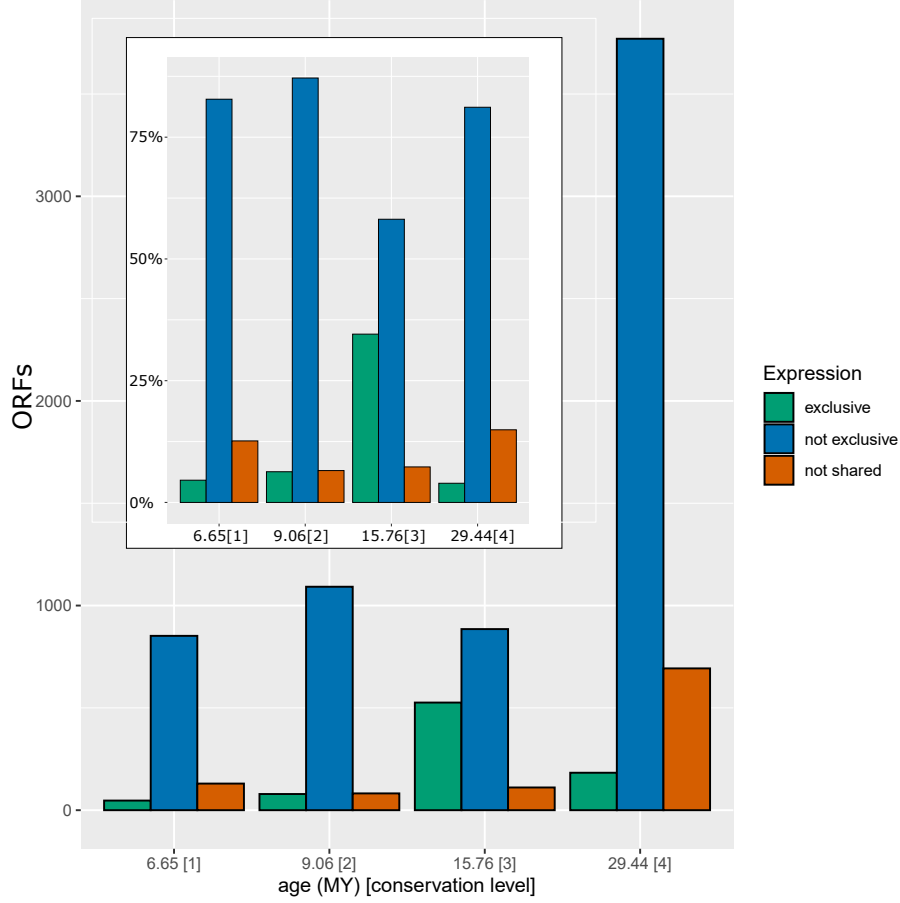

Figure S8: **Expression of human ORFs and homologous ORFs** . Expression of ORFs was compared between human and other primates in six tissues (brain, cerebellum, liver, heart, testes, and kidney). ORFs are categorized into three groups. 1) ORFs which are expressed in the exact same tissues in human and other taxa (exclusive, green bar), for example homologs expressed in brain in human and brain in chimpanzee. 2) ORFs which share expression in at least one tissue, but not all tissues (not exclusive, blue bar), for example homologs expressed in brain in human but brain and heart in chimpanzee. 3) ORFs which are expressed in different tissues in human and other taxa (not shared, red bar), for example homologs expressed in brain in human but heart in chimpanzee. The inset shows the proportion of ORFs belonging to each category as a percentage. Each age/conservation levels sums to 100%.

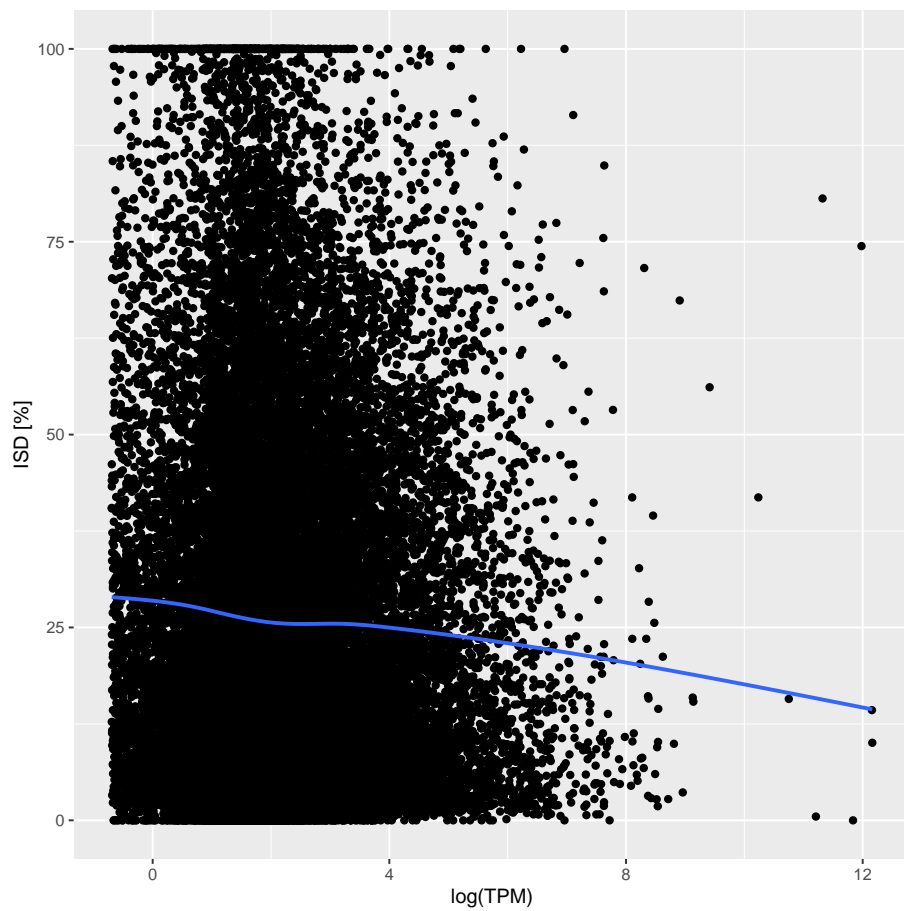

Figure S9: **Intrinsic structural disorder (ISD) and expression level.** ISD of expressed human ORFs does not correlate strongly with expression.

## 10 Analyses of new sequence properties

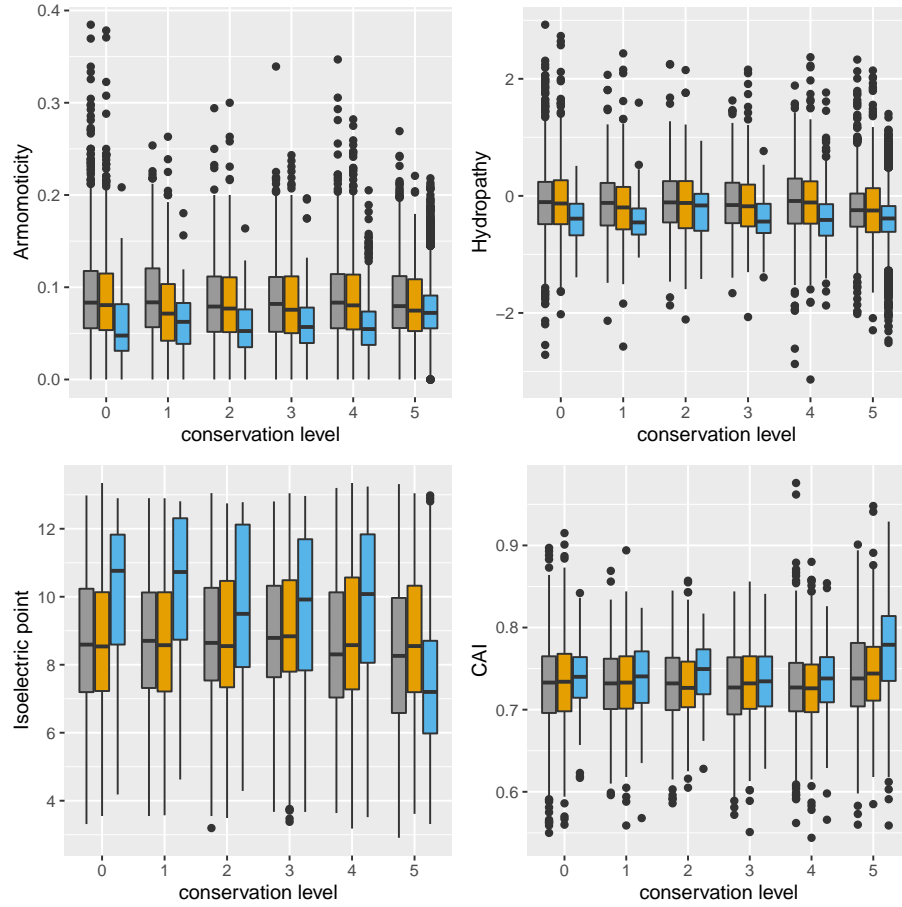

Figure S10: **Sequence properties of transcribed human ORFs** Top left: Proportion of aromatic amino-acids. Top right: Proportion of hydrophilic and hydrophobic amino-acids. Bottom left: Isoelectric point. Bottom right: Codon adaptation index. Box colours correspond to ORFs overlapping intergenic regions (grey), introns (yellow), and CDSs (blue).

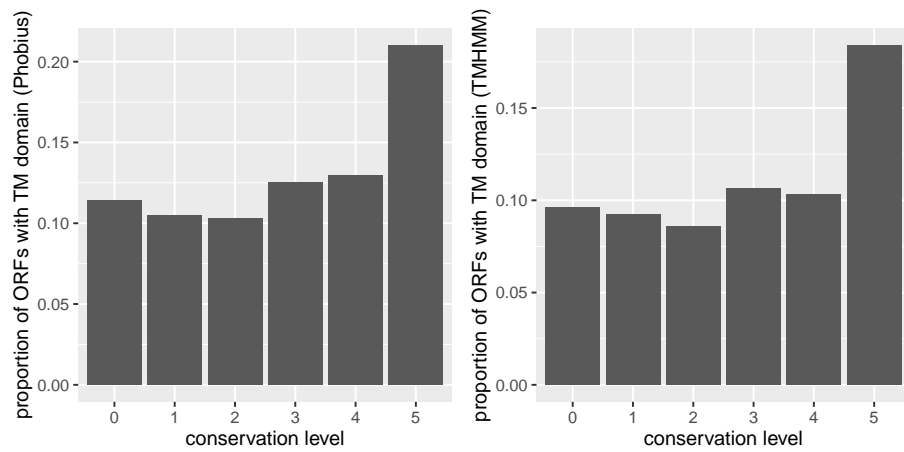

Figure S11: **Transmembrane domains in transcribed human ORFs.** Proportion of ORFs with at least one transmembrane domains predicted by Phobius (left) or TMHMM (right).

## References

- [1] David Brawand, Magali Soumillon, Anamaria Necsulea, Philippe Julien, Gábor Csárdi, Patrick Harrigan, Manuela Weier, Angélica Liechti, Ayinuer Aximu-Petri, Martin Kircher, Frank W. Albert, Ulrich Zeller, Philipp Khaitovich, Frank Grützner, Sven Bergmann, Rasmus Nielsen, Svante Pääbo, and Henrik Kaessmann. The evolution of gene expression levels in mammalian organs. *Nature*, 478(7369):343–348, October 2011.
- [2] Alexis Battle, Zia Khan, Sidney H. Wang, Amy Mitrano, Michael J. Ford, Jonathan K. Pritchard, and Yoav Gilad. Impact of regulatory variation from RNA to protein. *Science*, 347(6222):664–667, 2015.
- [3] Massimo Alfano, Filippo Pederzoli, Irene Locatelli, Silvia Ippolito, Erika Longhi, Pietro Zerbi, Maurizio Ferrari, Andrea Brendolan, Francesco Montorsi, Denise Drago, Annapaola Andolfo, Manuela Nebuloni, and Andrea Salonia. Impaired testicular signaling of vitamin A and vitamin K contributes to the aberrant composition of the extracellular matrix in idiopathic germ cell aplasia. *Fertility and Sterility*, 111(4):687–698, April 2019.
- [4] B. A. Diner, T. Li, T. M. Greco, M. S. Crow, J. A. Fuesler, J. Wang, and I. M. Cristea. The functional interactome of PYHIN immune regulators reveals IFIX is a sensor of viral DNA. *Molecular Systems Biology*, 11(2):787–787, February 2015.
- [5] Yajing Hao, Lili Zhang, Yiwei Niu, Tanxi Cai, Jianjun Luo, Shunmin He, Bao Zhang, Dejiu Zhang, Yan Qin, Fuquan Yang, and Runsheng Chen. SmProt: a database of small proteins encoded by annotated coding and non-coding RNA loci. *Briefings in Bioinformatics*, 19(4):636–643, 01 2017.
